# Supplementary material for: Major Outbreaks in the Nineteenth Century Shaped Grape Phylloxera Contemporary Genetic Structure in Europe
Source: PubMed Central journal article supplement (PMC6879566; doi:10.1038/s41598-019-54122-0), 2019-11-26
Supplement: 41598_2019_54122_MOESM1_ESM.pdf [file 41598_2019_54122_MOESM1_ESM.pdf]

# Major Outbreaks in the Nineteenth Century Shaped Grape Phylloxera Contemporary Genetic Structure in Europe

Javier Tello<sup>1,\*</sup>, Roswitha Mammerler<sup>1</sup>, Marko Čajić<sup>1,2</sup>, Astrid Forneck<sup>1</sup>

<sup>1</sup> Department of Crop Sciences, Institute of Viticulture and Pomology, University of Natural Resources and Applied Life Sciences Vienna, Konrad Lorenz Str. 24, A-3430 Tulln, Austria

<sup>2</sup> Faculty of Agricultural Sciences, University of Zagreb, Svetošimunska cesta 25, 10000, Zagreb, Croatia

\* javier.tello@boku.ac.at

## List of Supplementary Files

**Supplementary Figure S1.** Estimates of the number of genetic groups ( $K$ ) in grape phylloxera European populations based on *MedMedK*, *MedMeanK*, *MaxMedK* and *MaxMeanK* statistics obtained from STRUCTURE SELECTOR using (A) sampling site (country), (B) feeding form or (C) host plant as correcting factor. The horizontal red line indicates the most likely number of genetic groups in the population in each case.

**Supplementary Figure S2.** Delta K plot obtained from STRUCTURE HARVESTER to determine the most likely number of genetic groups present in 302 grape phylloxera MLGs obtained from Europe and 319 MLGs from the native range and diverse introduced regions (data from Lund et al.<sup>3</sup>).

**Supplementary Figure S3.** Location of the sampling sites of grape phylloxera populations (coloured circles). Note that for the sake of simplicity, sites in South Africa and Uruguay are not shown. Map was generated using Multiplottr 3.0 (<http://multiplottr.com>).

**Supplementary Table S1.** SSRs profiles of the 774 multi-locus genotypes (MLGs) identified in this study. For each MLG, we indicate its sampling site (country), grape phylloxera feeding form, host plant and genetic group assigned by STRUCTURE analysis ( $K=2$ ).

**Supplementary Table S2.** Genetic group assignment at  $K=2$ , 3 and 5 for 302 grape phylloxera MLGs identified in Europe (143 of Eu1 and 159 of Eu2) and 319 MLGs from the native range.

**Supplementary Table S3.** List of the 1173 grape phylloxera individuals included in this study. For each sample, we indicate the sampling site (country), grape phylloxera feeding form and host plant.

**a) Country**

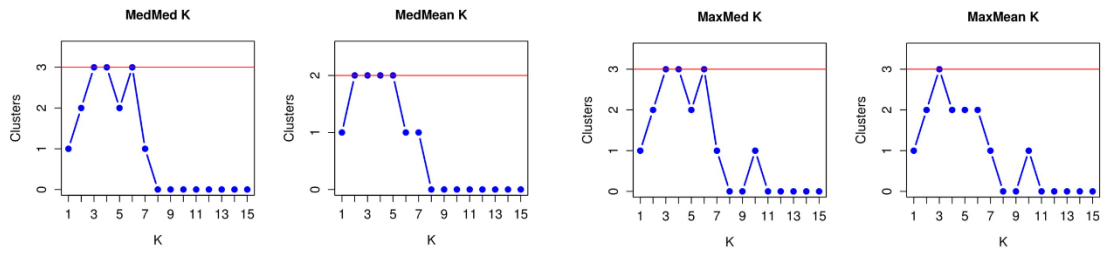

**b) Grape phylloxera feeding form**

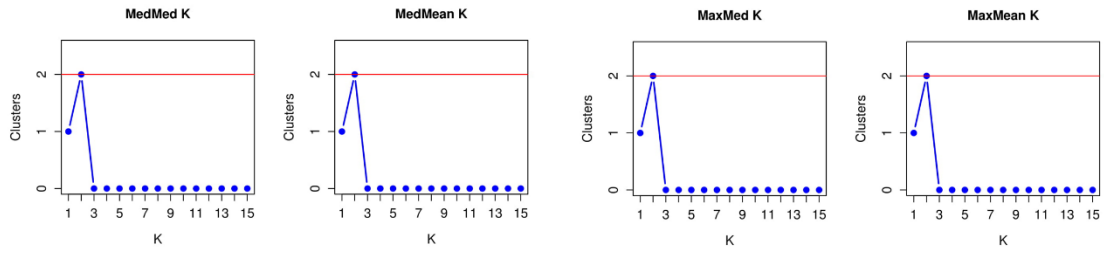

**c) Host plant**

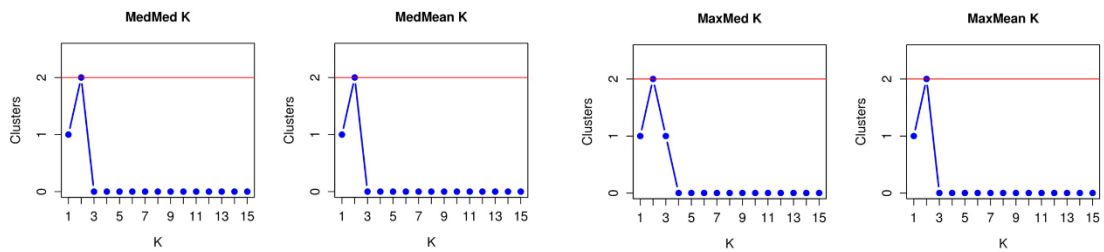

**Supplementary Figure S1.** Estimates of the number of genetic groups ( $K$ ) in grape phylloxera European populations based on *MedMedK*, *MedMeanK*, *MaxMedK* and *MaxMeanK* statistics obtained from STRUCTURE SELECTOR using (A) sampling site (country), (B) feeding form or (C) host plant as correcting factor. The horizontal red line indicates the most likely number of genetic groups in the population in each case.

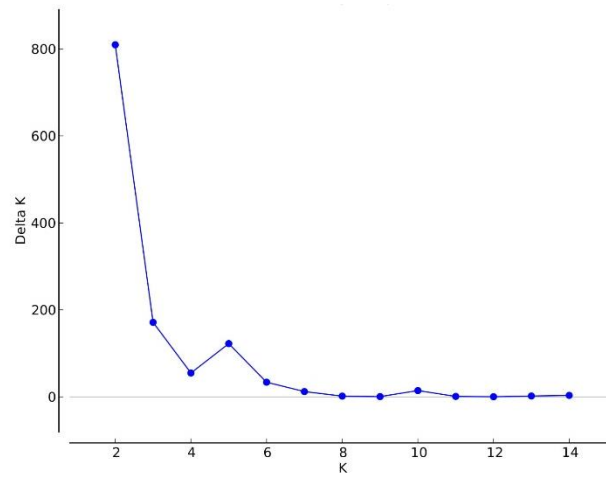

**Supplementary Figure S2.** Delta K plot obtained from STRUCTURE HARVESTER to determine the most likely number of genetic groups present in 302 grape phylloxera MLGs obtained from Europe and 319 MLGs from the native range and diverse introduced regions (data from Lund et al. <sup>3</sup>).

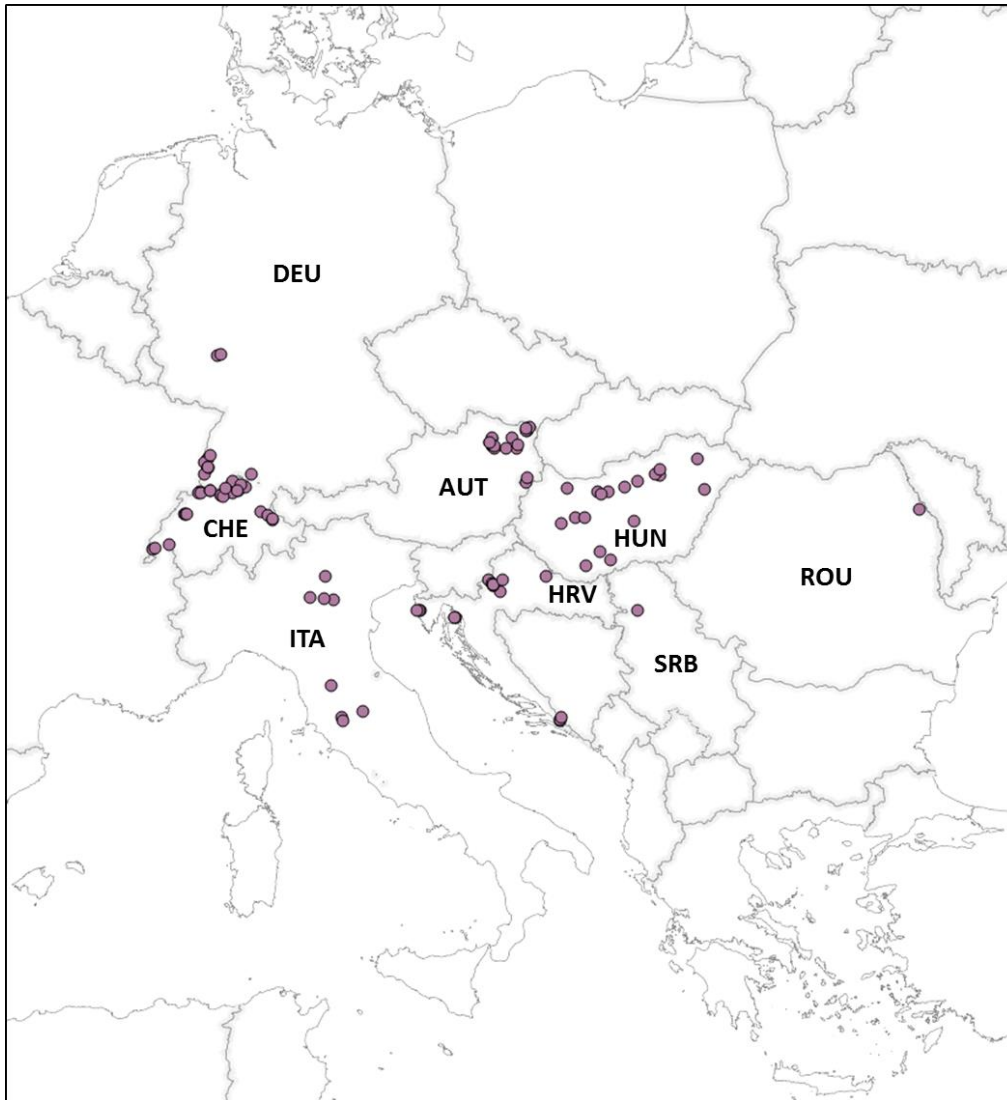

**Supplementary Figure S3.** Location of the sampling sites of grape phylloxera populations (coloured circles). Note that for the sake of simplicity, sites in South Africa and Uruguay are not shown. Map was generated using Multiplottr 3.0 (<http://multiplottr.com>).

**Supplementary Table S1.** SSRs profiles of the 774 multi-locus genotypes (MLGs) identified in this study. For each MLG, we indicate its sampling site (country), grape phylloxera feeding form, host plant and genetic group assigned by STRUCTURE analysis (K=2).

| MLG   | N  | Sample(s)<br>Code <sup>1</sup>                                            | Country <sup>2</sup> | Feeding<br>form | Host<br>plant <sup>3</sup> | PhyIII_55 | PhyIII_30 | PhyIII_36 | DV8     | Dvit6   | DVSSR4  | DV4     | Genetic<br>group<br>(K=2) |
|-------|----|---------------------------------------------------------------------------|----------------------|-----------------|----------------------------|-----------|-----------|-----------|---------|---------|---------|---------|---------------------------|
| MLG1  | 2  | AUT001,<br>AUT004                                                         | AUT (2)              | Leaf (2)        | Vvin (2)                   | 130:130   | 129:132   | 195:195   | 145:147 | 208:208 | 251:251 | 210:228 | Eu2                       |
| MLG2  | 1  | AUT002                                                                    | AUT (1)              | Leaf (1)        | Vvin (1)                   | 130:130   | 129:132   | 195:195   | 145:147 | 208:208 | 251:251 | 228:228 | Eu2                       |
| MLG3  | 1  | AUT003                                                                    | AUT (1)              | Leaf (1)        | Vvin (1)                   | 124:124   | 129:132   | 195:195   | 143:145 | 202:208 | 245:251 | 219:222 | Admixed                   |
| MLG4  | 1  | AUT005                                                                    | AUT (1)              | Leaf (1)        | Vvin (1)                   | 124:130   | 132:132   | 195:207   | 147:147 | 208:208 | 251:251 | 210:228 | Admixed                   |
| MLG5  | 1  | AUT006                                                                    | AUT (1)              | Leaf (1)        | RGV (1)                    | 124:124   | 132:132   | 195:213   | 143:147 | 202:208 | 251:251 | 210:222 | Admixed                   |
| MLG6  | 1  | AUT007                                                                    | AUT (1)              | Leaf (1)        | RGV (1)                    | 124:130   | 129:132   | 195:207   | 149:149 | 196:202 | 251:251 | 222:222 | Eu1                       |
| MLG7  | 1  | AUT008                                                                    | AUT (1)              | Leaf (1)        | RGV (1)                    | 121:124   | 132:132   | 195:204   | 143:145 | 202:202 | 251:251 | 222:222 | Admixed                   |
| MLG8  | 1  | AUT009                                                                    | AUT (1)              | Leaf (1)        | RGV (1)                    | 124:127   | 129:132   | 195:195   | 143:145 | 202:202 | 241:251 | 219:219 | Admixed                   |
| MLG9  | 2  | AUT010,<br>AUT011                                                         | AUT (2)              | Leaf (2)        | Vvin (2)                   | 124:133   | 129:132   | 195:213   | 143:145 | 205:208 | 251:251 | 210:222 | Admixed                   |
| MLG10 | 1  | AUT012                                                                    | AUT (1)              | Leaf (1)        | Vvin (1)                   | 115:124   | 129:132   | 195:210   | 143:147 | 202:205 | 251:251 | 219:222 | Admixed                   |
| MLG11 | 2  | AUT013,<br>AUT014                                                         | AUT (2)              | Leaf (2)        | Vvin (2)                   | 124:124   | 129:129   | 195:195   | 145:145 | 202:205 | 251:251 | 222:222 | Admixed                   |
| MLG12 | 3  | AUT015,<br>AUT016,<br>AUT017                                              | AUT (3)              | Leaf (3)        | RGV (3)                    | 124:130   | 129:132   | 195:195   | 143:145 | 202:208 | 251:251 | 222:222 | Admixed                   |
| MLG13 | 1  | AUT018                                                                    | AUT (1)              | Leaf (1)        | Rts (1)                    | 124:130   | 132:135   | 195:195   | 143:145 | 208:208 | 253:253 | 216:216 | Eu2                       |
| MLG14 | 1  | AUT019                                                                    | AUT (1)              | Leaf (1)        | Rts (1)                    | 124:124   | 132:132   | 195:195   | 143:143 | 205:208 | 253:253 | 216:219 | Admixed                   |
| MLG15 | 1  | AUT020                                                                    | AUT (1)              | Leaf (1)        | Rts (1)                    | 124:130   | 132:135   | 195:195   | 143:143 | 208:208 | 251:253 | 216:216 | Eu2                       |
| MLG16 | 18 | AUT021,<br>AUT022,<br>AUT023,<br>AUT095,<br>AUT096,<br>AUT100,<br>AUT103, | AUT (18)             | Leaf (18)       | Rts (18)                   | 130:130   | 132:135   | 195:195   | 145:145 | 202:208 | 251:251 | 222:222 | Eu2                       |

| MLG   | N | Sample(s)<br>Code <sup>1</sup>                                                                                       | Country <sup>2</sup> | Feeding<br>form | Host<br>plant <sup>3</sup> | PhyIII_55 | PhyIII_30 | PhyIII_36 | DV8     | Dvit6   | DVSSR4  | DV4     | Genetic<br>group<br>(K=2) |
|-------|---|----------------------------------------------------------------------------------------------------------------------|----------------------|-----------------|----------------------------|-----------|-----------|-----------|---------|---------|---------|---------|---------------------------|
|       |   | AUT104,<br>AUT105,<br>AUT106,<br>AUT109,<br>AUT110,<br>AUT111,<br>AUT112,<br>AUT115,<br>AUT119,<br>AUT120,<br>AUT121 |                      |                 |                            |           |           |           |         |         |         |         |                           |
| MLG17 | 1 | AUT024                                                                                                               | AUT (1)              | Leaf (1)        | Rts (1)                    | 130:130   | 132:132   | 195:198   | 147:147 | 199:205 | 251:251 | 219:222 | Eu2                       |
| MLG18 | 1 | AUT025                                                                                                               | AUT (1)              | Leaf (1)        | Rts (1)                    | 124:130   | 129:129   | 195:195   | 145:145 | 202:208 | 251:253 | 219:219 | Eu2                       |
| MLG19 | 1 | AUT026                                                                                                               | AUT (1)              | Leaf (1)        | Rts (1)                    | 130:130   | 129:132   | 195:195   | 145:145 | 202:205 | 251:251 | 222:228 | Eu2                       |
| MLG20 | 1 | AUT027                                                                                                               | AUT (1)              | Leaf (1)        | Rts (1)                    | 127:130   | 129:132   | 195:195   | 143:143 | 202:202 | 251:251 | 222:222 | Admixed                   |
| MLG21 | 1 | AUT028                                                                                                               | AUT (1)              | Leaf (1)        | Rts (1)                    | 130:130   | 132:132   | 195:198   | 145:147 | 199:205 | 251:253 | 219:222 | Admixed                   |
| MLG22 | 1 | AUT029                                                                                                               | AUT (1)              | Leaf (1)        | Rts (1)                    | 124:127   | 129:132   | 195:195   | 143:143 | 202:202 | 251:251 | 219:222 | Admixed                   |
| MLG23 | 1 | AUT030                                                                                                               | AUT (1)              | Leaf (1)        | Rts (1)                    | 127:130   | 129:132   | 195:198   | 143:145 | 202:205 | 251:251 | 219:219 | Admixed                   |
| MLG24 | 1 | AUT031                                                                                                               | AUT (1)              | Leaf (1)        | Rts (1)                    | 130:130   | 129:129   | 195:195   | 143:143 | 202:202 | 251:251 | 222:222 | Eu2                       |
| MLG25 | 1 | AUT032                                                                                                               | AUT (1)              | Leaf (1)        | Rts (1)                    | 127:130   | 129:132   | 195:207   | 143:145 | 202:208 | 251:251 | 219:219 | Admixed                   |
| MLG26 | 2 | AUT033,<br>AUT041                                                                                                    | AUT (2)              | Leaf (2)        | Rts (2)                    | 130:130   | 132:132   | 195:198   | 147:147 | 199:205 | 251:253 | 219:222 | Admixed                   |
| MLG27 | 1 | AUT034                                                                                                               | AUT (1)              | Leaf (1)        | Rts (1)                    | 130:130   | 129:132   | 198:198   | 147:147 | 199:205 | 251:253 | 219:222 | Eu2                       |
| MLG28 | 3 | AUT035,<br>AUT038,<br>AUT050                                                                                         | AUT (3)              | Leaf (3)        | Rts (3)                    | 124:124   | 129:132   | 195:195   | 145:145 | 202:205 | 245:251 | 222:225 | Admixed                   |
| MLG29 | 1 | AUT036                                                                                                               | AUT (1)              | Leaf (1)        | Rts (1)                    | 130:130   | 132:132   | 195:195   | 143:147 | 202:205 | 251:251 | 219:222 | Admixed                   |
| MLG30 | 1 | AUT037                                                                                                               | AUT (1)              | Leaf (1)        | Rts (1)                    | 124:124   | 129:132   | 195:195   | 145:145 | 202:205 | 251:253 | 222:225 | Admixed                   |
| MLG31 | 1 | AUT039                                                                                                               | AUT (1)              | Leaf (1)        | Rts (1)                    | 127:130   | 132:135   | 195:195   | 143:143 | 202:202 | 251:251 | 222:228 | Eu2                       |
| MLG32 | 1 | AUT040                                                                                                               | AUT (1)              | Leaf (1)        | Rts (1)                    | 127:130   | 129:132   | 195:195   | 145:145 | 202:205 | 251:251 | 222:228 | Admixed                   |
| MLG33 | 1 | AUT042                                                                                                               | AUT (1)              | Leaf (1)        | Rts (1)                    | 130:130   | 129:129   | 195:195   | 145:147 | 202:205 | 245:251 | 222:228 | Eu2                       |

| MLG   | N | Sample(s)<br>Code <sup>1</sup>                                                      | Country <sup>2</sup> | Feeding<br>form | Host<br>plant <sup>3</sup> | PhyIII_55 | PhyIII_30 | PhyIII_36 | DV8     | Dvit6   | DVSSR4  | DV4     | Genetic<br>group<br>(K=2) |
|-------|---|-------------------------------------------------------------------------------------|----------------------|-----------------|----------------------------|-----------|-----------|-----------|---------|---------|---------|---------|---------------------------|
| MLG34 | 1 | AUT043                                                                              | AUT (1)              | Leaf (1)        | Rts (1)                    | 124:127   | 132:135   | 195:195   | 143:143 | 202:202 | 251:251 | 222:228 | Admixed                   |
| MLG35 | 1 | AUT044                                                                              | AUT (1)              | Leaf (1)        | Rts (1)                    | 130:130   | 129:129   | 195:195   | 145:145 | 202:208 | 245:255 | 216:219 | Eu2                       |
| MLG36 | 1 | AUT045                                                                              | AUT (1)              | Leaf (1)        | Rts (1)                    | 133:133   | 129:132   | 195:195   | 145:147 | 202:208 | 251:253 | 219:222 | Eu2                       |
| MLG37 | 1 | AUT046                                                                              | AUT (1)              | Leaf (1)        | Rts (1)                    | 124:124   | 129:132   | 195:195   | 145:145 | 202:208 | 245:251 | 222:225 | Admixed                   |
| MLG38 | 1 | AUT047                                                                              | AUT (1)              | Leaf (1)        | Rts (1)                    | 130:130   | 129:132   | 195:195   | 145:147 | 202:205 | 251:251 | 219:228 | Eu2                       |
| MLG39 | 1 | AUT048                                                                              | AUT (1)              | Leaf (1)        | Rts (1)                    | 130:130   | 132:135   | 195:198   | 147:147 | 199:205 | 251:253 | 219:222 | Eu2                       |
| MLG40 | 1 | AUT049                                                                              | AUT (1)              | Leaf (1)        | Rts (1)                    | 124:130   | 129:132   | 195:195   | 143:145 | 202:202 | 253:253 | 216:216 | Admixed                   |
| MLG41 | 1 | AUT051                                                                              | AUT (1)              | Leaf (1)        | Rts (1)                    | 130:130   | 132:132   | 195:198   | 147:147 | 199:205 | 251:253 | 216:219 | Eu2                       |
| MLG42 | 1 | AUT052                                                                              | AUT (1)              | Leaf (1)        | Rts (1)                    | 127:130   | 129:132   | 195:195   | 143:145 | 202:202 | 251:253 | 219:222 | Admixed                   |
| MLG43 | 1 | AUT053                                                                              | AUT (1)              | Leaf (1)        | Rts (1)                    | 127:127   | 129:132   | 195:207   | 145:147 | 202:205 | 251:251 | 216:222 | Admixed                   |
| MLG44 | 8 | AUT054,<br>AUT055,<br>AUT058,<br>AUT062,<br>AUT070,<br>AUT073,<br>AUT074,<br>AUT075 | AUT (8)              | Leaf (8)        | Rts (8)                    | 121:124   | 132:135   | 195:195   | 145:147 | 202:208 | 251:253 | 210:216 | Admixed                   |
| MLG45 | 3 | AUT056,<br>AUT056,<br>AUT059                                                        | AUT (3)              | Leaf (3)        | Rts (3)                    | 121:124   | 132:135   | 195:195   | 145:147 | 202:208 | 251:253 | 216:216 | Eu2                       |
| MLG46 | 4 | AUT060,<br>AUT077,<br>AUT078,<br>AUT080                                             | AUT (4)              | Leaf (4)        | Rts (4)                    | 127:127   | 132:132   | 195:195   | 145:147 | 202:202 | 241:253 | 210:216 | Admixed                   |
| MLG47 | 1 | AUT061                                                                              | AUT (1)              | Leaf (1)        | Rts (1)                    | 127:127   | 132:132   | 195:195   | 145:147 | 202:202 | 253:253 | 210:216 | Admixed                   |
| MLG48 | 1 | AUT063                                                                              | AUT (1)              | Leaf (1)        | Rts (1)                    | 121:124   | 132:132   | 195:195   | 145:147 | 202:208 | 251:253 | 210:216 | Admixed                   |
| MLG49 | 2 | AUT064,<br>AUT068                                                                   | AUT (2)              | Leaf (2)        | Rts (2)                    | 127:130   | 132:132   | 195:195   | 145:147 | 202:208 | 251:251 | 219:222 | Admixed                   |

| MLG   | N | Sample(s)<br>Code <sup>1</sup>                                | Country <sup>2</sup> | Feeding<br>form | Host<br>plant <sup>3</sup> | PhyIII_55 | PhyIII_30 | PhyIII_36 | DV8     | Dvit6   | DVSSR4  | DV4     | Genetic<br>group<br>(K=2) |
|-------|---|---------------------------------------------------------------|----------------------|-----------------|----------------------------|-----------|-----------|-----------|---------|---------|---------|---------|---------------------------|
| MLG50 | 3 | AUT065,<br>AUT066,<br>AUT069                                  | AUT (3)              | Leaf (3)        | Rts (3)                    | 124:127   | 132:132   | 195:198   | 145:147 | 202:208 | 251:251 | 219:222 | Admixed                   |
| MLG51 | 1 | AUT067                                                        | AUT (1)              | Leaf (1)        | Rts (1)                    | 130:130   | 132:132   | 195:195   | 145:147 | 202:208 | 251:251 | 219:222 | Admixed                   |
| MLG52 | 1 | AUT071                                                        | AUT (1)              | Leaf (1)        | Rts (1)                    | 121:124   | 129:132   | 195:195   | 145:147 | 202:205 | 251:253 | 210:216 | Admixed                   |
| MLG53 | 1 | AUT072                                                        | AUT (1)              | Leaf (1)        | Rts (1)                    | 124:127   | 135:135   | 195:195   | 145:147 | 202:202 | 241:251 | 210:216 | Admixed                   |
| MLG54 | 2 | AUT076,<br>AUT079                                             | AUT (2)              | Leaf (2)        | Rts (2)                    | 127:127   | 132:132   | 195:195   | 145:147 | 202:202 | 241:253 | 216:216 | Admixed                   |
| MLG55 | 1 | AUT081                                                        | AUT (1)              | Leaf (1)        | Rts (1)                    | 127:130   | 132:132   | 195:195   | 145:147 | 202:202 | 241:253 | 216:216 | Admixed                   |
| MLG56 | 1 | AUT082                                                        | AUT (1)              | Leaf (1)        | Rts (1)                    | 124:130   | 129:132   | 195:195   | 145:145 | 202:202 | 251:251 | 222:228 | Eu2                       |
| MLG57 | 1 | AUT083                                                        | AUT (1)              | Leaf (1)        | Rts (1)                    | 124:130   | 132:132   | 198:198   | 143:143 | 208:208 | 251:253 | 219:219 | Admixed                   |
| MLG58 | 5 | AUT084,<br>AUT085,<br>AUT086,<br>AUT087,<br>AUT090            | AUT (5)              | Leaf (5)        | Rts (5)                    | 124:130   | 132:135   | 198:198   | 143:143 | 208:208 | 251:253 | 219:219 | Eu2                       |
| MLG59 | 1 | AUT088                                                        | AUT (1)              | Leaf (1)        | Rts (1)                    | 124:130   | 129:129   | 195:195   | 145:145 | 205:208 | 251:251 | 219:219 | Eu2                       |
| MLG60 | 1 | AUT089                                                        | AUT (1)              | Leaf (1)        | Rts (1)                    | 124:124   | 129:129   | 195:195   | 143:145 | 205:205 | 251:251 | 219:222 | Admixed                   |
| MLG61 | 1 | AUT091                                                        | AUT (1)              | Leaf (1)        | Rts (1)                    | 124:130   | 132:135   | 198:198   | 143:143 | 208:208 | 251:251 | 219:219 | Eu2                       |
| MLG62 | 1 | AUT092                                                        | AUT (1)              | Leaf (1)        | Rts (1)                    | 124:127   | 132:135   | 195:195   | 143:143 | 202:205 | 251:251 | 210:219 | Admixed                   |
| MLG63 | 1 | AUT093                                                        | AUT (1)              | Leaf (1)        | Rts (1)                    | 130:133   | 129:132   | 195:195   | 143:145 | 202:205 | 251:253 | 219:222 | Admixed                   |
| MLG64 | 1 | AUT094                                                        | AUT (1)              | Leaf (1)        | Rts (1)                    | 124:127   | 129:135   | 195:195   | 143:145 | 202:208 | 251:251 | 219:219 | Eu2                       |
| MLG65 | 1 | AUT097                                                        | AUT (1)              | Leaf (1)        | Rts (1)                    | 130:130   | 132:135   | 195:195   | 145:145 | 205:205 | 251:251 | 222:222 | Admixed                   |
| MLG66 | 6 | AUT098,<br>AUT102,<br>AUT107,<br>AUT113,<br>AUT116,<br>AUT117 | AUT (6)              | Leaf (6)        | Rts (6)                    | 124:133   | 132:141   | 195:195   | 143:143 | 205:205 | 245:251 | 222:222 | Admixed                   |
| MLG67 | 1 | AUT099                                                        | AUT (1)              | Leaf (1)        | Rts (1)                    | 124:124   | 132:132   | 195:195   | 145:145 | 196:196 | 245:253 | 222:222 | Eu1                       |



| MLG   | N  | Sample(s)<br>Code <sup>1</sup>                                                                                                  | Country <sup>2</sup> | Feeding<br>form | Host<br>plant <sup>3</sup> | PhyIII_55 | PhyIII_30 | PhyIII_36 | DV8     | Dvit6   | DVSSR4  | DV4     | Genetic<br>group<br>(K=2) |
|-------|----|---------------------------------------------------------------------------------------------------------------------------------|----------------------|-----------------|----------------------------|-----------|-----------|-----------|---------|---------|---------|---------|---------------------------|
| MLG68 | 1  | AUT101                                                                                                                          | AUT (1)              | Leaf (1)        | Rts (1)                    | 130:130   | 132:135   | 195:195   | 145:145 | 202:208 | 249:249 | 222:222 | Admixed                   |
| MLG69 | 1  | AUT108                                                                                                                          | AUT (1)              | Leaf (1)        | Rts (1)                    | 127:130   | 129:141   | 195:195   | 145:147 | 196:202 | 245:245 | 210:222 | Admixed                   |
| MLG70 | 1  | AUT114                                                                                                                          | AUT (1)              | Leaf (1)        | Rts (1)                    | 127:130   | 132:135   | 195:195   | 145:145 | 202:208 | 253:253 | 219:222 | Admixed                   |
| MLG71 | 1  | AUT118                                                                                                                          | AUT (1)              | Leaf (1)        | Rts (1)                    | 124:124   | 132:135   | 195:195   | 145:145 | 202:208 | 251:251 | 222:222 | Admixed                   |
| MLG72 | 1  | AUT122                                                                                                                          | AUT (1)              | Leaf (1)        | Rts (1)                    | 130:130   | 129:132   | 195:195   | 145:145 | 208:208 | 251:253 | 219:222 | Eu2                       |
| MLG73 | 3  | AUT123,<br>AUT125,<br>AUT128                                                                                                    | AUT (3)              | Leaf (3)        | Rts (3)                    | 130:130   | 129:132   | 183:195   | 145:145 | 208:208 | 251:253 | 219:222 | Eu2                       |
| MLG74 | 2  | AUT124,<br>AUT127                                                                                                               | AUT (2)              | Leaf (2)        | Rts (2)                    | 121:130   | 129:132   | 183:195   | 145:145 | 208:208 | 251:253 | 219:222 | Eu2                       |
| MLG75 | 12 | AUT126,<br>AUT130,<br>AUT131,<br>AUT132,<br>AUT133,<br>AUT134,<br>AUT135,<br>AUT136,<br>AUT137,<br>AUT138,<br>AUT139,<br>AUT140 | AUT (12)             | Leaf (12)       | Rts (12)                   | 130:130   | 129:132   | 183:195   | 145:145 | 208:208 | 251:253 | 204:219 | Eu2                       |
| MLG76 | 1  | AUT129                                                                                                                          | AUT (1)              | Leaf (1)        | Rts (1)                    | 130:130   | 129:132   | 195:195   | 145:145 | 208:208 | 251:253 | 204:219 | Eu2                       |
| MLG77 | 3  | AUT141,<br>AUT143,<br>AUT144                                                                                                    | AUT (3)              | Leaf (3)        | Rts (3)                    | 127:130   | 132:132   | 195:195   | 145:145 | 208:208 | 251:251 | 222:222 | Admixed                   |
| MLG78 | 1  | AUT142                                                                                                                          | AUT (1)              | Leaf (1)        | Rts (1)                    | 127:130   | 132:132   | 195:195   | 145:145 | 208:208 | 251:251 | 207:222 | Admixed                   |
| MLG79 | 2  | AUT145,<br>AUT146                                                                                                               | AUT (2)              | Leaf (2)        | Rts (2)                    | 124:133   | 132:141   | 195:198   | 145:147 | 202:205 | 251:253 | 216:216 | Admixed                   |
| MLG80 | 1  | AUT147                                                                                                                          | AUT (1)              | Leaf (1)        | Rts (1)                    | 124:130   | 132:135   | 195:207   | 143:145 | 202:208 | 241:251 | 222:222 | Admixed                   |
| MLG81 | 1  | AUT148                                                                                                                          | AUT (1)              | Leaf (1)        | Rts (1)                    | 127:133   | 129:141   | 183:195   | 143:145 | 202:205 | 251:253 | 216:222 | Eu2                       |
| MLG82 | 1  | AUT149                                                                                                                          | AUT (1)              | Leaf (1)        | Rts (1)                    | 124:133   | 129:132   | 195:198   | 145:147 | 202:205 | 251:253 | 216:216 | Eu2                       |

| MLG    | N | Sample(s)<br>Code <sup>1</sup>                     | Country <sup>2</sup> | Feeding<br>form | Host<br>plant <sup>3</sup> | PhyIII_55 | PhyIII_30 | PhyIII_36 | DV8     | Dvit6   | DVSSR4  | DV4     | Genetic<br>group<br>(K=2) |
|--------|---|----------------------------------------------------|----------------------|-----------------|----------------------------|-----------|-----------|-----------|---------|---------|---------|---------|---------------------------|
| MLG83  | 1 | AUT150                                             | AUT (1)              | Leaf (1)        | Rts (1)                    | 127:133   | 129:129   | 195:195   | 143:145 | 202:202 | 251:251 | 216:222 | Eu2                       |
| MLG84  | 1 | AUT151                                             | AUT (1)              | Leaf (1)        | Rts (1)                    | 121:127   | 129:135   | 195:213   | 143:145 | 205:208 | 253:253 | 216:216 | Admixed                   |
| MLG85  | 1 | AUT152                                             | AUT (1)              | Leaf (1)        | Rts (1)                    | 130:130   | 132:141   | 195:195   | 147:147 | 202:202 | 251:253 | 216:216 | Eu2                       |
| MLG86  | 1 | AUT153                                             | AUT (1)              | Leaf (1)        | Rts (1)                    | 121:133   | 129:141   | 195:195   | 143:145 | 202:205 | 251:253 | 216:216 | Eu2                       |
| MLG87  | 5 | AUT154,<br>AUT155,<br>AUT156,<br>AUT157,<br>AUT158 | AUT (5)              | Leaf (5)        | Rts (5)                    | 130:130   | 132:141   | 195:195   | 143:143 | 202:202 | 251:251 | 222:222 | Admixed                   |
| MLG88  | 2 | AUT159,<br>AUT165                                  | AUT (2)              | Leaf (2)        | Rts (2)                    | 124:130   | 132:132   | 195:195   | 143:143 | 205:205 | 241:241 | 216:216 | Eu1                       |
| MLG89  | 4 | AUT160,<br>AUT161,<br>AUT163,<br>AUT164            | AUT (4)              | Leaf (4)        | Rts (4)                    | 127:130   | 129:132   | 195:204   | 143:143 | 202:202 | 241:253 | 216:219 | Admixed                   |
| MLG90  | 1 | AUT162                                             | AUT (1)              | Leaf (1)        | Rts (1)                    | 127:130   | 129:132   | 195:204   | 143:147 | 202:205 | 251:253 | 216:219 | Admixed                   |
| MLG91  | 1 | AUT166                                             | AUT (1)              | Leaf (1)        | Rts (1)                    | 121:124   | 135:135   | 195:213   | 145:145 | 208:208 | 253:253 | 216:216 | Eu2                       |
| MLG92  | 1 | AUT167                                             | AUT (1)              | Leaf (1)        | Rts (1)                    | 115:130   | 132:135   | 195:213   | 143:145 | 205:208 | 251:253 | 210:216 | Admixed                   |
| MLG93  | 1 | AUT168                                             | AUT (1)              | Leaf (1)        | Rts (1)                    | 127:130   | 129:135   | 195:198   | 145:147 | 202:202 | 251:253 | 210:216 | Eu2                       |
| MLG94  | 1 | AUT169                                             | AUT (1)              | Leaf (1)        | Rts (1)                    | 130:133   | 129:132   | 195:204   | 145:145 | 202:202 | 251:251 | 219:219 | Eu2                       |
| MLG95  | 1 | AUT170                                             | AUT (1)              | Leaf (1)        | Rts (1)                    | 121:127   | 135:141   | 195:213   | 143:145 | 208:208 | 241:251 | 222:222 | Admixed                   |
| MLG96  | 1 | AUT171                                             | AUT (1)              | Leaf (1)        | Rts (1)                    | 127:127   | 129:135   | 195:198   | 145:147 | 202:202 | 251:253 | 216:216 | Eu2                       |
| MLG97  | 5 | AUT172,<br>AUT173,<br>AUT174,<br>AUT175,<br>AUT176 | AUT (5)              | Leaf (5)        | Rts (5)                    | 121:127   | 132:132   | 195:195   | 143:147 | 208:208 | 251:251 | 216:219 | Admixed                   |
| MLG98  | 2 | AUT177,<br>AUT179                                  | AUT (2)              | Leaf (2)        | Rts (2)                    | 121:121   | 132:135   | 195:195   | 143:145 | 208:208 | 251:253 | 216:216 | Eu2                       |
| MLG99  | 1 | AUT178                                             | AUT (1)              | Leaf (1)        | Rts (1)                    | 136:136   | 132:135   | 195:195   | 143:145 | 208:208 | 251:253 | 216:216 | Eu2                       |
| MLG100 | 1 | AUT180                                             | AUT (1)              | Leaf (1)        | Rts (1)                    | 121:121   | 132:135   | 195:195   | 143:145 | 208:208 | 251:253 | 210:216 | Admixed                   |

| MLG    | N | Sample(s)<br>Code <sup>1</sup>                                | Country <sup>2</sup> | Feeding<br>form       | Host<br>plant <sup>3</sup> | PhyIII_55 | PhyIII_30 | PhyIII_36 | DV8     | Dvit6   | DVSSR4  | DV4     | Genetic<br>group<br>(K=2) |
|--------|---|---------------------------------------------------------------|----------------------|-----------------------|----------------------------|-----------|-----------|-----------|---------|---------|---------|---------|---------------------------|
| MLG101 | 1 | AUT181                                                        | AUT (1)              | Leaf (1)              | Rts (1)                    | 121:121   | 132:135   | 195:195   | 143:143 | 208:208 | 251:253 | 216:216 | Eu2                       |
| MLG102 | 1 | AUT182                                                        | AUT (1)              | Leaf (1)              | Rts (1)                    | 127:130   | 120:132   | 195:195   | 143:145 | 202:202 | 241:251 | 219:222 | Admixed                   |
| MLG103 | 1 | AUT183                                                        | AUT (1)              | Leaf (1)              | Rts (1)                    | 127:130   | 120:132   | 183:201   | 143:145 | 202:202 | 241:251 | 219:222 | Admixed                   |
| MLG104 | 3 | AUT184,<br>AUT186,<br>AUT188                                  | AUT (3)              | Leaf (3)              | Rts (3)                    | 115:130   | 132:135   | 183:195   | 145:145 | 202:205 | 251:251 | 210:222 | Admixed                   |
| MLG105 | 2 | AUT185,<br>AUT189                                             | AUT (2)              | Leaf (2)              | Rts (2)                    | 124:127   | 129:135   | 195:213   | 143:145 | 205:208 | 251:253 | 210:228 | Admixed                   |
| MLG106 | 1 | AUT187                                                        | AUT (1)              | Leaf (1)              | Rts (1)                    | 130:130   | 120:132   | 183:195   | 145:147 | 205:208 | 245:251 | 222:222 | Admixed                   |
| MLG107 | 1 | AUT190                                                        | AUT (1)              | Leaf (1)              | Rts (1)                    | 136:136   | 132:135   | 195:195   | 145:145 | 202:205 | 251:251 | 210:222 | Admixed                   |
| MLG108 | 6 | AUT191,<br>AUT192,<br>AUT193,<br>AUT194,<br>AUT195,<br>AUT196 | AUT (6)              | Leaf (6)              | Rts (6)                    | 130:130   | 129:135   | 195:195   | 143:147 | 202:202 | 251:251 | 216:219 | Eu2                       |
| MLG109 | 1 | AUT197                                                        | AUT (1)              | Leaf (1)              | Rts (1)                    | 130:130   | 123:132   | 195:204   | 143:145 | 205:205 | 251:251 | 219:222 | Admixed                   |
| MLG110 | 1 | AUT198                                                        | AUT (1)              | Leaf (1)              | Rts (1)                    | 121:124   | 132:135   | 195:204   | 143:145 | 205:205 | 251:251 | 216:219 | Admixed                   |
| MLG111 | 5 | AUT199,<br>AUT200,<br>AUT201,<br>AUT202,<br>AUT203            | AUT (5)              | Leaf (5)              | Rts (5)                    | 121:127   | 132:135   | 195:204   | 143:145 | 205:205 | 251:251 | 216:219 | Admixed                   |
| MLG112 | 2 | AUT204,<br>AUT205                                             | AUT (2)              | Leaf (2)              | Rts (2)                    | 127:130   | 129:129   | 195:195   | 143:145 | 205:208 | 245:251 | 219:222 | Admixed                   |
| MLG113 | 5 | AUT206,<br>AUT208,<br>AUT209,<br>AUT210,<br>CHE206            | AUT (4),<br>CHE (1)  | Leaf (4),<br>Root (1) | HDP (1),<br>Rts (4)        | 127:130   | 129:132   | 195:195   | 145:145 | 202:202 | 241:251 | 222:222 | Admixed                   |
| MLG114 | 1 | AUT207                                                        | AUT (1)              | Leaf (1)              | Rts (1)                    | 124:133   | 129:132   | 195:198   | 143:145 | 208:208 | 251:253 | 216:219 | Eu2                       |
| MLG115 | 1 | AUT211                                                        | AUT (1)              | Leaf (1)              | Rts (1)                    | 130:130   | 129:132   | 195:207   | 145:145 | 205:208 | 241:251 | 222:222 | Admixed                   |

| MLG    | N  | Sample(s)<br>Code <sup>1</sup>                                 | Country <sup>2</sup> | Feeding<br>form | Host<br>plant <sup>3</sup> | PhyIII_55 | PhyIII_30 | PhyIII_36 | DV8     | Dvit6   | DVSSR4  | DV4     | Genetic<br>group<br>(K=2) |
|--------|----|----------------------------------------------------------------|----------------------|-----------------|----------------------------|-----------|-----------|-----------|---------|---------|---------|---------|---------------------------|
| MLG116 | 4  | AUT212,<br>AUT213,<br>AUT215,<br>AUT2016                       | AUT (4)              | Leaf (4)        | Rts (4)                    | 127:130   | 129:132   | 198:207   | 145:145 | 202:208 | 241:241 | 222:222 | Admixed                   |
| MLG117 | 1  | AUT214                                                         | AUT (1)              | Leaf (1)        | Rts (1)                    | 127:130   | 129:132   | 195:195   | 145:145 | 205:208 | 251:253 | 219:222 | Admixed                   |
| MLG118 | 1  | AUT217                                                         | AUT (1)              | Leaf (1)        | Rts (1)                    | 127:130   | 129:132   | 198:207   | 145:145 | 202:202 | 241:241 | 222:222 | Admixed                   |
| MLG119 | 1  | AUT218                                                         | AUT (1)              | Leaf (1)        | Rts (1)                    | 130:130   | 129:129   | 195:195   | 145:145 | 205:208 | 251:251 | 219:222 | Eu2                       |
| MLG120 | 1  | AUT219                                                         | AUT (1)              | Leaf (1)        | Rts (1)                    | 127:130   | 132:132   | 183:195   | 147:147 | 202:208 | 241:251 | 207:222 | Admixed                   |
| MLG121 | 3  | AUT220,<br>AUT221,<br>AUT222                                   | AUT (3)              | Leaf (3)        | Rts (3)                    | 127:130   | 132:132   | 195:195   | 147:147 | 202:208 | 241:251 | 222:222 | Admixed                   |
| MLG122 | 3  | AUT223,<br>AUT225,<br>AUT226                                   | AUT (3)              | Leaf (3)        | Rts (3)                    | 130:130   | 129:132   | 195:195   | 143:143 | 202:208 | 251:251 | 222:222 | Eu2                       |
| MLG123 | 1  | AUT224                                                         | AUT (1)              | Leaf (1)        | Rts (1)                    | 130:130   | 132:132   | 195:207   | 145:145 | 202:208 | 241:251 | 222:222 | Admixed                   |
| MLG124 | 2  | AUT227,<br>AUT229                                              | AUT (2)              | Leaf (2)        | Rts (2)                    | 130:130   | 129:132   | 183:195   | 143:143 | 202:208 | 251:251 | 222:222 | Eu2                       |
| MLG125 | 1  | AUT228                                                         | AUT (1)              | Leaf (1)        | Rts (1)                    | 121:130   | 129:132   | 183:195   | 143:143 | 202:208 | 251:251 | 222:222 | Eu2                       |
| MLG126 | 4  | AUT230,<br>AUT231,<br>AUT232,<br>AUT236                        | AUT (4)              | Leaf (4)        | Rts (4)                    | 130:130   | 129:132   | 183:195   | 145:145 | 202:208 | 251:251 | 222:222 | Eu2                       |
| MLG127 | 1  | AUT233                                                         | AUT (1)              | Leaf (1)        | Rts (1)                    | 127:130   | 129:141   | 183:195   | 143:145 | 202:202 | 251:253 | 216:219 | Eu2                       |
| MLG128 | 1  | AUT234                                                         | AUT (1)              | Leaf (1)        | Rts (1)                    | 127:130   | 129:132   | 195:195   | 145:145 | 205:208 | 245:251 | 219:222 | Admixed                   |
| MLG129 | 1  | AUT235                                                         | AUT (1)              | Leaf (1)        | Rts (1)                    | 130:130   | 129:132   | 195:207   | 145:147 | 202:208 | 251:251 | 222:222 | Admixed                   |
| MLG130 | 1  | AUT237                                                         | AUT (1)              | Leaf (1)        | Rts (1)                    | 130:130   | 129:129   | 183:195   | 145:145 | 202:208 | 251:251 | 222:222 | Eu2                       |
| MLG131 | 14 | AUT238,<br>AUT239,<br>AUT242,<br>AUT243,<br>AUT244,<br>AUT245, | AUT (14)             | Leaf (14)       | Rts (14)                   | 127:130   | 129:132   | 195:195   | 143:147 | 202:202 | 251:251 | 222:222 | Admixed                   |

| MLG    | N | Sample(s)<br>Code <sup>1</sup>                                                      | Country <sup>2</sup> | Feeding<br>form | Host<br>plant <sup>3</sup> | PhyIII_55 | PhyIII_30 | PhyIII_36 | DV8     | Dvit6   | DVSSR4  | DV4     | Genetic<br>group<br>(K=2) |
|--------|---|-------------------------------------------------------------------------------------|----------------------|-----------------|----------------------------|-----------|-----------|-----------|---------|---------|---------|---------|---------------------------|
|        |   | AUT246,<br>AUT247,<br>AUT248,<br>AUT249,<br>AUT250,<br>AUT251,<br>AUT252,<br>AUT253 |                      |                 |                            |           |           |           |         |         |         |         |                           |
| MLG132 | 1 | AUT240                                                                              | AUT (1)              | Leaf (1)        | Rts (1)                    | 127:130   | 129:129   | 195:210   | 143:147 | 202:202 | 251:251 | 222:222 | Admixed                   |
| MLG133 | 1 | AUT241                                                                              | AUT (1)              | Leaf (1)        | Rts (1)                    | 127:130   | 129:132   | 183:195   | 143:147 | 202:202 | 251:251 | 222:222 | Eu2                       |
| MLG134 | 1 | AUT254                                                                              | AUT (1)              | Leaf (1)        | Rts (1)                    | 121:124   | 129:141   | 195:213   | 143:145 | 208:208 | 251:251 | 216:228 | Eu2                       |
| MLG135 | 3 | AUT255,<br>AUT256,<br>AUT257                                                        | AUT (3)              | Leaf (3)        | Rts (3)                    | 121:124   | 129:132   | 195:195   | 145:145 | 208:208 | 251:253 | 216:222 | Admixed                   |
| MLG136 | 2 | AUT258,<br>AUT259                                                                   | AUT (2)              | Leaf (2)        | Rts (2)                    | 121:124   | 129:141   | 195:213   | 143:145 | 208:208 | 251:253 | 216:228 | Eu2                       |
| MLG137 | 1 | AUT260                                                                              | AUT (1)              | Leaf (1)        | Rts (1)                    | 115:127   | 129:132   | 195:195   | 143:145 | 202:205 | 251:251 | 216:222 | Admixed                   |
| MLG138 | 1 | AUT261                                                                              | AUT (1)              | Leaf (1)        | Rts (1)                    | 124:130   | 129:132   | 195:195   | 143:145 | 202:208 | 251:251 | 204:207 | Eu2                       |
| MLG139 | 2 | AUT262,<br>AUT263                                                                   | AUT (2)              | Leaf (2)        | Rts (2)                    | 124:130   | 129:141   | 195:195   | 143:145 | 202:208 | 251:251 | 222:222 | Eu2                       |
| MLG140 | 3 | AUT264,<br>AUT265,<br>AUT268                                                        | AUT (3)              | Leaf (3)        | Rts (3)                    | 121:130   | 132:132   | 195:195   | 145:145 | 202:205 | 241:253 | 222:222 | Admixed                   |
| MLG141 | 1 | AUT266                                                                              | AUT (1)              | Leaf (1)        | Rts (1)                    | 121:130   | 123:132   | 183:195   | 147:147 | 202:208 | 251:253 | 222:222 | Eu2                       |
| MLG142 | 1 | AUT267                                                                              | AUT (1)              | Leaf (1)        | Rts (1)                    | 130:130   | 123:132   | 183:195   | 147:147 | 202:208 | 251:253 | 222:222 | Eu2                       |
| MLG143 | 1 | AUT269                                                                              | AUT (1)              | Leaf (1)        | Rts (1)                    | 121:130   | 123:132   | 183:195   | 145:145 | 202:205 | 241:253 | 207:222 | Admixed                   |
| MLG144 | 6 | AUT270,<br>AUT271,<br>AUT272,<br>AUT273,<br>AUT276,<br>AUT277                       | AUT (6)              | Leaf (6)        | Rts (6)                    | 124:130   | 132:135   | 195:195   | 143:147 | 202:202 | 251:253 | 216:222 | Eu2                       |

| MLG    | N | Sample(s)<br>Code <sup>1</sup> | Country <sup>2</sup> | Feeding<br>form | Host<br>plant <sup>3</sup> | PhyIII_55 | PhyIII_30 | PhyIII_36 | DV8     | Dvit6   | DVSSR4  | DV4     | Genetic<br>group<br>(K=2) |
|--------|---|--------------------------------|----------------------|-----------------|----------------------------|-----------|-----------|-----------|---------|---------|---------|---------|---------------------------|
| MLG145 | 1 | AUT274                         | AUT (1)              | Leaf (1)        | Rts (1)                    | 124:127   | 129:135   | 195:195   | 145:145 | 202:208 | 251:253 | 216:222 | Eu2                       |
| MLG146 | 1 | AUT275                         | AUT (1)              | Leaf (1)        | Rts (1)                    | 124:130   | 135:135   | 195:195   | 143:147 | 202:202 | 251:253 | 216:222 | Eu2                       |
| MLG147 | 1 | AUT278                         | AUT (1)              | Leaf (1)        | Rts (1)                    | 124:127   | 129:135   | 195:195   | 143:143 | 202:208 | 251:253 | 219:222 | Eu2                       |
| MLG148 | 2 | AUT279,<br>AUT282              | AUT (2)              | Leaf (2)        | Rts (2)                    | 127:130   | 132:132   | 195:195   | 145:145 | 205:208 | 251:253 | 213:219 | Admixed                   |
| MLG149 | 1 | AUT280                         | AUT (1)              | Leaf (1)        | Rts (1)                    | 127:130   | 135:135   | 195:195   | 145:145 | 202:202 | 251:251 | 222:228 | Eu2                       |
| MLG150 | 1 | AUT281                         | AUT (1)              | Leaf (1)        | Rts (1)                    | 127:130   | 135:135   | 183:195   | 145:145 | 202:202 | 251:251 | 222:228 | Eu2                       |
| MLG151 | 1 | AUT283                         | AUT (1)              | Leaf (1)        | Rts (1)                    | 124:127   | 123:135   | 195:195   | 145:145 | 202:202 | 251:251 | 222:222 | Admixed                   |
| MLG152 | 3 | AUT284,<br>AUT285,<br>AUT286   | AUT (3)              | Leaf (3)        | Rts (3)                    | 127:130   | 129:132   | 195:195   | 143:143 | 205:205 | 251:251 | 210:222 | Admixed                   |
| MLG153 | 2 | AUT287,<br>AUT288              | AUT (2)              | Leaf (2)        | Rts (2)                    | 124:127   | 129:132   | 195:204   | 145:147 | 202:205 | 251:253 | 222:222 | Admixed                   |
| MLG154 | 1 | AUT289                         | AUT (1)              | Leaf (1)        | Rts (1)                    | 127:130   | 129:132   | 195:207   | 143:143 | 205:205 | 251:251 | 210:222 | Eu1                       |
| MLG155 | 2 | AUT290,<br>AUT293              | AUT (2)              | Leaf (2)        | Rts (2)                    | 124:130   | 129:132   | 195:195   | 145:145 | 202:202 | 251:251 | 222:222 | Admixed                   |
| MLG156 | 1 | AUT291                         | AUT (1)              | Leaf (1)        | Rts (1)                    | 127:127   | 132:132   | 195:195   | 143:147 | 202:205 | 251:251 | 219:225 | Admixed                   |
| MLG157 | 1 | AUT292                         | AUT (1)              | Leaf (1)        | Rts (1)                    | 124:130   | 129:132   | 195:195   | 145:145 | 202:202 | 251:251 | 207:222 | Admixed                   |
| MLG158 | 1 | AUT294                         | AUT (1)              | Leaf (1)        | Rts (1)                    | 124:130   | 129:132   | 183:195   | 145:145 | 202:202 | 251:251 | 207:222 | Eu2                       |
| MLG159 | 1 | AUT295                         | AUT (1)              | Leaf (1)        | Rts (1)                    | 127:130   | 129:132   | 195:195   | 143:145 | 205:208 | 251:253 | 222:222 | Admixed                   |
| MLG160 | 1 | AUT296                         | AUT (1)              | Leaf (1)        | Rts (1)                    | 124:130   | 129:132   | 195:204   | 145:147 | 208:208 | 251:253 | 213:216 | Eu2                       |
| MLG161 | 2 | AUT297,<br>AUT298              | AUT (2)              | Leaf (2)        | Rts (2)                    | 127:130   | 129:135   | 195:198   | 145:147 | 202:208 | 253:253 | 222:222 | Eu2                       |
| MLG162 | 1 | AUT299                         | AUT (1)              | Leaf (1)        | Rts (1)                    | 124:127   | 129:132   | 195:195   | 145:145 | 202:208 | 253:253 | 216:222 | Admixed                   |
| MLG163 | 1 | AUT300                         | AUT (1)              | Leaf (1)        | Rts (1)                    | 127:130   | 129:132   | 195:198   | 145:147 | 202:208 | 253:253 | 222:222 | Eu2                       |
| MLG164 | 1 | AUT301                         | AUT (1)              | Leaf (1)        | Rts (1)                    | 121:127   | 126:132   | 195:195   | 145:145 | 202:205 | 251:251 | 216:222 | Admixed                   |
| MLG165 | 3 | AUT302,<br>AUT304,<br>AUT307   | AUT (3)              | Leaf (3)        | Rts (3)                    | 127:130   | 129:141   | 195:195   | 143:147 | 202:205 | 251:253 | 216:222 | Admixed                   |
| MLG166 | 1 | AUT303                         | AUT (1)              | Leaf (1)        | Rts (1)                    | 124:124   | 132:135   | 195:195   | 143:147 | 202:208 | 251:251 | 222:228 | Eu2                       |

| MLG    | N | Sample(s)<br>Code <sup>1</sup>                     | Country <sup>2</sup> | Feeding<br>form | Host<br>plant <sup>3</sup> | PhyIII_55 | PhyIII_30 | PhyIII_36 | DV8     | Dvit6   | DVSSR4  | DV4     | Genetic<br>group<br>(K=2) |
|--------|---|----------------------------------------------------|----------------------|-----------------|----------------------------|-----------|-----------|-----------|---------|---------|---------|---------|---------------------------|
| MLG167 | 1 | AUT305                                             | AUT (1)              | Leaf (1)        | Rts (1)                    | 127:127   | 132:132   | 195:195   | 145:145 | 202:202 | 251:253 | 216:222 | Admixed                   |
| MLG168 | 1 | AUT306                                             | AUT (1)              | Leaf (1)        | Rts (1)                    | 127:130   | 129:141   | 183:195   | 143:147 | 202:205 | 251:253 | 216:222 | Admixed                   |
| MLG169 | 1 | AUT308                                             | AUT (1)              | Leaf (1)        | Rts (1)                    | 130:130   | 129:132   | 195:195   | 143:143 | 202:202 | 251:253 | 213:222 | Admixed                   |
| MLG170 | 4 | AUT309,<br>AUT310,<br>AUT311,<br>AUT312            | AUT (4)              | Leaf (4)        | Rts (4)                    | 127:130   | 129:135   | 195:204   | 143:145 | 202:205 | 251:251 | 219:222 | Eu2                       |
| MLG171 | 2 | AUT313,<br>AUT314                                  | AUT (2)              | Leaf (2)        | Rts (2)                    | 130:130   | 129:135   | 195:195   | 143:145 | 202:208 | 251:251 | 210:228 | Eu2                       |
| MLG172 | 1 | AUT315                                             | AUT (1)              | Leaf (1)        | Rts (1)                    | 127:127   | 129:135   | 195:195   | 147:147 | 202:208 | 241:251 | 210:216 | Eu2                       |
| MLG173 | 1 | AUT316                                             | AUT (1)              | Leaf (1)        | Rts (1)                    | 127:133   | 129:132   | 195:198   | 143:147 | 202:208 | 251:253 | 216:228 | Eu2                       |
| MLG174 | 1 | AUT317                                             | AUT (1)              | Leaf (1)        | Rts (1)                    | 127:130   | 129:135   | 195:195   | 143:143 | 208:208 | 251:251 | 210:222 | Eu2                       |
| MLG175 | 1 | AUT318                                             | AUT (1)              | Leaf (1)        | Rts (1)                    | 121:127   | 129:135   | 195:195   | 145:147 | 208:208 | 251:251 | 216:216 | Eu2                       |
| MLG176 | 2 | AUT319,<br>AUT321                                  | AUT (2)              | Leaf (2)        | Rts (2)                    | 121:127   | 132:135   | 195:195   | 145:147 | 208:208 | 251:251 | 216:216 | Eu2                       |
| MLG177 | 2 | AUT320,<br>AUT327                                  | AUT (2)              | Leaf (2)        | Rts (2)                    | 130:130   | 132:135   | 195:198   | 143:147 | 208:208 | 241:251 | 216:228 | Eu2                       |
| MLG178 | 1 | AUT322                                             | AUT (1)              | Leaf (1)        | Rts (1)                    | 124:133   | 129:132   | 195:195   | 145:147 | 202:208 | 251:251 | 216:222 | Eu2                       |
| MLG179 | 2 | AUT323,<br>AUT326                                  | AUT (2)              | Leaf (2)        | Rts (2)                    | 124:133   | 129:132   | 195:198   | 145:147 | 202:208 | 251:251 | 216:222 | Eu2                       |
| MLG180 | 1 | AUT324                                             | AUT (1)              | Leaf (1)        | Rts (1)                    | 130:130   | 129:135   | 195:198   | 143:147 | 208:208 | 241:251 | 216:228 | Eu2                       |
| MLG181 | 1 | AUT325                                             | AUT (1)              | Leaf (1)        | Rts (1)                    | 127:130   | 129:132   | 195:198   | 143:147 | 205:205 | 251:251 | 210:222 | Admixed                   |
| MLG182 | 1 | AUT328                                             | AUT (1)              | Leaf (1)        | Rts (1)                    | 130:130   | 129:132   | 195:195   | 143:147 | 205:208 | 251:253 | 222:222 | Admixed                   |
| MLG183 | 5 | AUT329,<br>AUT330,<br>AUT331,<br>AUT333,<br>AUT334 | AUT (5)              | Leaf (5)        | Rts (5)                    | 124:130   | 129:132   | 195:204   | 143:145 | 202:205 | 251:253 | 210:210 | Eu1                       |
| MLG184 | 1 | AUT332                                             | AUT (1)              | Leaf (1)        | Rts (1)                    | 124:130   | 129:132   | 195:204   | 143:145 | 202:205 | 251:253 | 207:207 | Admixed                   |
| MLG185 | 1 | AUT335                                             | AUT (1)              | Leaf (1)        | Rts (1)                    | 124:130   | 129:132   | 195:204   | 143:145 | 205:205 | 251:253 | 210:210 | Eu1                       |
| MLG186 | 1 | AUT336                                             | AUT (1)              | Leaf (1)        | Rts (1)                    | 130:130   | 132:132   | 195:198   | 143:145 | 202:205 | 237:253 | 216:222 | Admixed                   |

| MLG    | N | Sample(s)<br>Code <sup>1</sup> | Country <sup>2</sup> | Feeding<br>form | Host<br>plant <sup>3</sup> | PhyIII_55 | PhyIII_30 | PhyIII_36 | DV8     | Dvit6   | DVSSR4  | DV4     | Genetic<br>group<br>(K=2) |
|--------|---|--------------------------------|----------------------|-----------------|----------------------------|-----------|-----------|-----------|---------|---------|---------|---------|---------------------------|
| MLG187 | 1 | AUT337                         | AUT (1)              | Leaf (1)        | Rts (1)                    | 115:133   | 135:135   | 195:195   | 145:145 | 208:208 | 251:251 | 222:222 | Eu2                       |
| MLG188 | 1 | AUT338                         | AUT (1)              | Leaf (1)        | Rts (1)                    | 115:133   | 135:135   | 195:195   | 143:145 | 202:208 | 251:251 | 222:222 | Eu2                       |
| MLG189 | 2 | AUT339,<br>AUT340              | AUT (2)              | Leaf (2)        | Rts (2)                    | 130:130   | 135:135   | 195:195   | 145:147 | 205:208 | 251:251 | 216:216 | Eu2                       |
| MLG190 | 2 | AUT341,<br>AUT342              | AUT (2)              | Leaf (2)        | Rts (2)                    | 130:130   | 135:135   | 195:195   | 143:145 | 205:208 | 245:251 | 219:222 | Eu2                       |
| MLG191 | 1 | AUT343                         | AUT (1)              | Leaf (1)        | Rts (1)                    | 130:130   | 135:135   | 195:195   | 145:145 | 202:202 | 241:251 | 222:222 | Eu2                       |
| MLG192 | 3 | AUT344,<br>AUT345,<br>AUT346   | AUT (3)              | Leaf (3)        | Rts (3)                    | 130:130   | 129:135   | 195:195   | 145:147 | 205:208 | 251:251 | 216:216 | Eu2                       |
| MLG193 | 1 | AUT347                         | AUT (1)              | Leaf (1)        | Rts (1)                    | 127:127   | 129:132   | 195:198   | 145:147 | 202:205 | 251:253 | 216:219 | Admixed                   |
| MLG194 | 1 | AUT348                         | AUT (1)              | Leaf (1)        | Rts (1)                    | 124:127   | 129:132   | 195:195   | 145:145 | 202:205 | 241:251 | 219:222 | Admixed                   |
| MLG195 | 1 | AUT349                         | AUT (1)              | Leaf (1)        | Rts (1)                    | 121:130   | 129:132   | 195:195   | 145:145 | 205:208 | 241:251 | 219:228 | Admixed                   |
| MLG196 | 1 | AUT350                         | AUT (1)              | Leaf (1)        | Rts (1)                    | 124:130   | 132:132   | 195:204   | 145:147 | 205:205 | 251:251 | 219:222 | Admixed                   |
| MLG197 | 1 | AUT351                         | AUT (1)              | Leaf (1)        | Rts (1)                    | 130:130   | 129:129   | 195:195   | 145:147 | 205:205 | 251:251 | 216:216 | Eu2                       |
| MLG198 | 1 | AUT352                         | AUT (1)              | Leaf (1)        | Rts (1)                    | 121:130   | 129:132   | 195:195   | 145:147 | 205:208 | 241:251 | 219:228 | Admixed                   |
| MLG199 | 1 | AUT353                         | AUT (1)              | Leaf (1)        | Rts (1)                    | 124:130   | 129:129   | 195:198   | 145:145 | 202:202 | 251:251 | 216:222 | Eu2                       |
| MLG200 | 2 | AUT354,<br>AUT361              | AUT (2)              | Leaf (2)        | Rts (2)                    | 121:121   | 129:132   | 195:195   | 143:145 | 202:205 | 251:251 | 219:222 | Admixed                   |
| MLG201 | 1 | AUT355                         | AUT (1)              | Leaf (1)        | Rts (1)                    | 121:124   | 129:132   | 195:198   | 145:147 | 202:205 | 251:253 | 222:222 | Admixed                   |
| MLG202 | 1 | AUT356                         | AUT (1)              | Leaf (1)        | Rts (1)                    | 121:121   | 132:135   | 195:195   | 147:147 | 202:202 | 251:251 | 216:219 | Eu2                       |
| MLG203 | 1 | AUT357                         | AUT (1)              | Leaf (1)        | Rts (1)                    | 124:127   | 129:132   | 195:195   | 147:147 | 202:205 | 251:253 | 216:216 | Admixed                   |
| MLG204 | 2 | AUT358,<br>AUT359              | AUT (2)              | Leaf (2)        | Rts (2)                    | 124:127   | 129:132   | 195:195   | 145:147 | 202:205 | 251:251 | 222:222 | Admixed                   |
| MLG205 | 1 | AUT360                         | AUT (1)              | Leaf (1)        | Rts (1)                    | 124:127   | 129:132   | 195:195   | 143:145 | 202:205 | 251:251 | 216:222 | Admixed                   |
| MLG206 | 1 | AUT362                         | AUT (1)              | Leaf (1)        | Rts (1)                    | 121:130   | 129:132   | 195:195   | 145:147 | 202:205 | 241:251 | 219:222 | Admixed                   |
| MLG207 | 1 | AUT363                         | AUT (1)              | Leaf (1)        | Rts (1)                    | 121:130   | 132:132   | 195:204   | 145:145 | 202:205 | 253:253 | 216:222 | Admixed                   |
| MLG208 | 2 | AUT364,<br>AUT368              | AUT (2)              | Leaf (2)        | Rts (2)                    | 115:124   | 129:135   | 198:204   | 143:145 | 202:202 | 251:251 | 216:222 | Eu2                       |
| MLG209 | 1 | AUT365                         | AUT (1)              | Leaf (1)        | Rts (1)                    | 127:127   | 129:135   | 198:204   | 143:145 | 202:202 | 237:253 | 216:222 | Eu2                       |



| MLG    | N | Sample(s)<br>Code <sup>1</sup> | Country <sup>2</sup> | Feeding<br>form | Host<br>plant <sup>3</sup> | PhyIII_55 | PhyIII_30 | PhyIII_36 | DV8     | Dvit6   | DVSSR4  | DV4     | Genetic<br>group<br>(K=2) |
|--------|---|--------------------------------|----------------------|-----------------|----------------------------|-----------|-----------|-----------|---------|---------|---------|---------|---------------------------|
| MLG210 | 1 | AUT366                         | AUT (1)              | Leaf (1)        | Rts (1)                    | 115:124   | 129:135   | 198:204   | 143:143 | 202:202 | 251:251 | 216:222 | Eu2                       |
| MLG211 | 1 | AUT367                         | AUT (1)              | Leaf (1)        | Rts (1)                    | 124:127   | 132:135   | 195:195   | 143:147 | 205:208 | 245:251 | 216:219 | Admixed                   |
| MLG212 | 1 | AUT369                         | AUT (1)              | Leaf (1)        | Rts (1)                    | 127:127   | 129:132   | 195:195   | 143:143 | 202:205 | 251:253 | 210:222 | Admixed                   |
| MLG213 | 1 | AUT370                         | AUT (1)              | Leaf (1)        | Rts (1)                    | 127:130   | 129:132   | 195:198   | 143:145 | 202:205 | 251:253 | 216:222 | Admixed                   |
| MLG214 | 1 | AUT371                         | AUT (1)              | Leaf (1)        | Rts (1)                    | 115:127   | 129:132   | 195:198   | 143:145 | 202:202 | 251:253 | 216:219 | Eu2                       |
| MLG215 | 1 | AUT372                         | AUT (1)              | Leaf (1)        | Rts (1)                    | 127:127   | 129:132   | 195:195   | 143:145 | 202:205 | 251:253 | 210:222 | Admixed                   |
| MLG216 | 1 | AUT373                         | AUT (1)              | Leaf (1)        | Rts (1)                    | 127:130   | 126:129   | 195:198   | 143:145 | 202:205 | 251:253 | 216:222 | Admixed                   |
| MLG217 | 2 | AUT374,<br>AUT375              | AUT (2)              | Leaf (2)        | Rts (2)                    | 115:127   | 126:126   | 195:198   | 143:145 | 202:202 | 251:253 | 216:219 | Eu2                       |
| MLG218 | 1 | AUT376                         | AUT (1)              | Leaf (1)        | Rts (1)                    | 130:130   | 129:129   | 195:210   | 143:143 | 202:205 | 251:253 | 219:222 | Admixed                   |
| MLG219 | 1 | AUT377                         | AUT (1)              | Leaf (1)        | Rts (1)                    | 130:130   | 129:129   | 195:210   | 143:143 | 202:205 | 251:253 | 222:222 | Admixed                   |
| MLG220 | 1 | AUT378                         | AUT (1)              | Leaf (1)        | Rts (1)                    | 127:127   | 126:126   | 195:195   | 145:147 | 202:205 | 245:245 | 216:222 | Admixed                   |
| MLG221 | 1 | AUT379                         | AUT (1)              | Leaf (1)        | Rts (1)                    | 130:130   | 132:132   | 195:210   | 143:143 | 202:205 | 253:253 | 207:222 | Admixed                   |
| MLG222 | 1 | AUT380                         | AUT (1)              | Leaf (1)        | Rts (1)                    | 124:130   | 132:135   | 195:198   | 145:145 | 202:202 | 251:251 | 222:222 | Eu2                       |
| MLG223 | 1 | AUT381                         | AUT (1)              | Leaf (1)        | Rts (1)                    | 130:130   | 129:132   | 195:198   | 143:145 | 202:205 | 245:251 | 216:222 | Admixed                   |
| MLG224 | 1 | AUT382                         | AUT (1)              | Leaf (1)        | Rts (1)                    | 115:127   | 129:132   | 195:195   | 145:147 | 202:202 | 251:251 | 216:228 | Eu2                       |
| MLG225 | 1 | AUT383                         | AUT (1)              | Leaf (1)        | Rts (1)                    | 130:130   | 129:129   | 195:210   | 143:143 | 202:205 | 251:251 | 222:222 | Admixed                   |
| MLG226 | 3 | AUT384,<br>AUT387,<br>AUT390   | AUT (3)              | Leaf (3)        | Rts (3)                    | 130:130   | 129:132   | 195:198   | 143:145 | 202:202 | 251:251 | 216:216 | Eu2                       |
| MLG227 | 1 | AUT385                         | AUT (1)              | Leaf (1)        | Rts (1)                    | 124:127   | 129:132   | 195:195   | 143:145 | 205:205 | 249:249 | 216:219 | Eu1                       |
| MLG228 | 1 | AUT386                         | AUT (1)              | Leaf (1)        | Rts (1)                    | 124:127   | 132:132   | 195:195   | 143:145 | 205:205 | 251:251 | 216:219 | Eu1                       |
| MLG229 | 1 | AUT388                         | AUT (1)              | Leaf (1)        | Rts (1)                    | 127:130   | 129:132   | 195:195   | 143:145 | 208:208 | 245:251 | 216:228 | Eu2                       |
| MLG230 | 1 | AUT389                         | AUT (1)              | Leaf (1)        | Rts (1)                    | 124:127   | 129:129   | 195:195   | 143:145 | 205:205 | 251:251 | 216:219 | Admixed                   |
| MLG231 | 1 | AUT391                         | AUT (1)              | Leaf (1)        | Rts (1)                    | 124:127   | 129:129   | 183:195   | 143:145 | 205:205 | 251:251 | 216:219 | Admixed                   |
| MLG232 | 1 | DEU001                         | DEU (1)              | Leaf (1)        | Vvin (1)                   | 130:130   | 132:132   | 198:207   | 143:145 | 202:208 | 253:253 | 210:219 | Admixed                   |
| MLG233 | 1 | DEU002                         | DEU (1)              | Leaf (1)        | Vvin (1)                   | 121:130   | 132:132   | 195:195   | 145:147 | 205:208 | 241:253 | 210:216 | Admixed                   |
| MLG234 | 1 | DEU003                         | DEU (1)              | Leaf (1)        | Vvin (1)                   | 121:130   | 132:132   | 195:195   | 143:145 | 202:205 | 251:253 | 210:225 | Eu1                       |

| MLG    | N | Sample(s)<br>Code <sup>1</sup>                     | Country <sup>2</sup> | Feeding<br>form | Host<br>plant <sup>3</sup> | PhyIII_55 | PhyIII_30 | PhyIII_36 | DV8     | Dvit6   | DVSSR4  | DV4     | Genetic<br>group<br>(K=2) |
|--------|---|----------------------------------------------------|----------------------|-----------------|----------------------------|-----------|-----------|-----------|---------|---------|---------|---------|---------------------------|
| MLG235 | 1 | DEU004                                             | DEU (1)              | Leaf (1)        | Vvin (1)                   | 130:130   | 132:132   | 195:195   | 143:143 | 205:208 | 251:253 | 210:222 | Admixed                   |
| MLG236 | 1 | DEU005                                             | DEU (1)              | Leaf (1)        | Vvin (1)                   | 121:130   | 129:129   | 195:195   | 143:145 | 202:208 | 245:253 | 210:219 | Admixed                   |
| MLG237 | 3 | DEU006,<br>DEU007,<br>DEU009                       | DEU (3)              | Leaf (3)        | Vvin (3)                   | 124:127   | 129:132   | 195:195   | 143:145 | 208:208 | 241:245 | 216:219 | Admixed                   |
| MLG238 | 1 | DEU008                                             | DEU (1)              | Leaf (1)        | Vvin (1)                   | 130:130   | 132:132   | 198:204   | 145:147 | 202:205 | 245:251 | 210:216 | Admixed                   |
| MLG239 | 1 | DEU010                                             | DEU (1)              | Leaf (1)        | Vvin (1)                   | 130:130   | 129:132   | 195:195   | 143:147 | 208:208 | 245:251 | 216:219 | Eu2                       |
| MLG240 | 1 | DEU011                                             | DEU (1)              | Leaf (1)        | Vvin (1)                   | 124:130   | 132:132   | 195:195   | 143:143 | 208:208 | 245:245 | 216:216 | Admixed                   |
| MLG241 | 2 | DEU012,<br>DEU013                                  | DEU (2)              | Leaf (2)        | Vvin (2)                   | 124:130   | 132:132   | 195:195   | 143:147 | 202:205 | 251:253 | 216:216 | Admixed                   |
| MLG242 | 1 | DEU014                                             | DEU (1)              | Leaf (1)        | Vvin (1)                   | 130:130   | 132:132   | 195:204   | 143:145 | 208:208 | 245:251 | 219:222 | Admixed                   |
| MLG243 | 1 | DEU015                                             | DEU (1)              | Leaf (1)        | Vvin (1)                   | 130:130   | 132:132   | 195:195   | 143:143 | 196:205 | 241:253 | 219:222 | Eu1                       |
| MLG244 | 1 | DEU016                                             | DEU (1)              | Leaf (1)        | Vvin (1)                   | -:-       | 132:132   | 195:195   | 143:143 | 196:205 | 241:253 | 219:222 | Eu1                       |
| MLG245 | 1 | DEU017                                             | DEU (1)              | Leaf (1)        | Vvin (1)                   | 124:130   | 132:132   | 195:195   | 145:147 | 196:208 | -:-     | 216:225 | Admixed                   |
| MLG246 | 1 | DEU018                                             | DEU (1)              | Leaf (1)        | Vvin (1)                   | 124:130   | 132:132   | 195:195   | 145:147 | 196:208 | 249:253 | 216:225 | Eu1                       |
| MLG247 | 5 | DEU019,<br>DEU030,<br>DEU031,<br>DEU032,<br>DEU056 | DEU (5)              | Leaf (5)        | HDP (4),<br>Vvin (1)       | 121:124   | 132:132   | 195:195   | 143:143 | 208:208 | 245:251 | 210:216 | Admixed                   |
| MLG248 | 1 | DEU020                                             | DEU (1)              | Leaf (1)        | Vvin (1)                   | 130:130   | 129:132   | 195:195   | 143:145 | 208:208 | 245:251 | 222:228 | Eu2                       |
| MLG249 | 1 | DEU021                                             | DEU (1)              | Leaf (1)        | Vvin (1)                   | 127:130   | 129:132   | 195:195   | 143:145 | 196:208 | 251:251 | 216:222 | Admixed                   |
| MLG250 | 1 | DEU022                                             | DEU (1)              | Leaf (1)        | Vvin (1)                   | 130:130   | 132:132   | 195:195   | 143:145 | 202:202 | 251:251 | 210:222 | Admixed                   |
| MLG251 | 1 | DEU023                                             | DEU (1)              | Leaf (1)        | Vvin (1)                   | 127:133   | 129:132   | 195:195   | 143:145 | 208:208 | 245:251 | 219:222 | Eu2                       |
| MLG252 | 5 | DEU024,<br>DEU025,<br>DEU026,<br>DEU027,<br>DEU028 | DEU (5)              | Leaf (5)        | Vvin (5)                   | 127:127   | 129:132   | 195:195   | 145:145 | 205:208 | 251:251 | 219:219 | Admixed                   |
| MLG253 | 1 | DEU029                                             | DEU (1)              | Leaf (1)        | Vvin (1)                   | 130:130   | 129:135   | 195:195   | 143:143 | 208:208 | 251:253 | 216:222 | Eu2                       |

| MLG    | N | Sample(s)<br>Code <sup>1</sup>                      | Country <sup>2</sup> | Feeding<br>form | Host<br>plant <sup>3</sup> | PhyIII_55 | PhyIII_30 | PhyIII_36 | DV8     | Dvit6   | DVSSR4  | DV4     | Genetic<br>group<br>(K=2) |
|--------|---|-----------------------------------------------------|----------------------|-----------------|----------------------------|-----------|-----------|-----------|---------|---------|---------|---------|---------------------------|
| MLG254 | 1 | DEU033                                              | DEU (1)              | Leaf (1)        | HDP (1)                    | 124:130   | 132:132   | 195:207   | 143:143 | 208:208 | 251:251 | 219:222 | Admixed                   |
| MLG255 | 1 | DEU034                                              | DEU (1)              | Leaf (1)        | HDP (1)                    | 124:124   | 132:132   | 195:207   | 143:143 | 208:208 | 251:251 | 219:222 | Admixed                   |
| MLG256 | 1 | DEU035                                              | DEU (1)              | Leaf (1)        | HDP (1)                    | 130:130   | 132:132   | 195:195   | 143:145 | 208:208 | 251:253 | 213:222 | Admixed                   |
| MLG257 | 1 | DEU036                                              | DEU (1)              | Leaf (1)        | HDP (1)                    | 124:127   | 132:141   | 195:207   | 143:143 | 205:208 | 251:253 | 222:222 | Eu1                       |
| MLG258 | 1 | DEU037                                              | DEU (1)              | Leaf (1)        | HDP (1)                    | 124:130   | 120:132   | 195:204   | 143:145 | 205:205 | 251:251 | 216:228 | Admixed                   |
| MLG259 | 2 | DEU038,<br>DEU039                                   | DEU (2)              | Leaf (2)        | HDP (2)                    | 130:130   | 132:132   | 195:195   | 143:145 | 205:205 | 241:251 | 216:222 | Admixed                   |
| MLG260 | 1 | DEU040                                              | DEU (1)              | Leaf (1)        | HDP (1)                    | 124:130   | 132:141   | 195:207   | 143:143 | 202:202 | 251:251 | 216:222 | Admixed                   |
| MLG261 | 1 | DEU041                                              | DEU (1)              | Leaf (1)        | HDP (1)                    | 124:127   | 132:141   | 195:207   | 143:143 | 202:202 | 251:251 | 216:222 | Admixed                   |
| MLG262 | 4 | DEU042,<br>DEU043,<br>DEU044,<br>DEU045             | DEU (4)              | Leaf (4)        | HDP (4)                    | 124:127   | 132:132   | 195:195   | 143:145 | 208:208 | 251:251 | 222:222 | Admixed                   |
| MLG263 | 1 | DEU046                                              | DEU (1)              | Leaf (1)        | HDP (1)                    | 124:127   | 132:132   | 195:204   | 143:143 | 202:202 | 245:251 | 216:222 | Admixed                   |
| MLG264 | 3 | DEU047,<br>DEU050,<br>DEU052                        | DEU (3)              | Leaf (3)        | HDP (3)                    | 124:127   | 132:135   | 195:207   | 143:147 | 202:202 | 251:253 | 222:222 | Admixed                   |
| MLG265 | 1 | DEU048                                              | DEU (1)              | Leaf (1)        | HDP (1)                    | 124:127   | 132:135   | 195:207   | 143:143 | 202:208 | 251:251 | 219:222 | Admixed                   |
| MLG266 | 1 | DEU049                                              | DEU (1)              | Leaf (1)        | HDP (1)                    | 124:127   | 132:135   | 195:207   | 143:145 | 202:202 | 251:253 | 216:222 | Admixed                   |
| MLG267 | 1 | DEU051                                              | DEU (1)              | Leaf (1)        | HDP (1)                    | 124:127   | 129:132   | 195:195   | 143:145 | 202:208 | 251:253 | 210:219 | Admixed                   |
| MLG268 | 3 | DEU053,<br>DEU054,<br>DEU055                        | DEU (3)              | Leaf (3)        | HDP (3)                    | 127:130   | 132:132   | 195:204   | 143:145 | 202:202 | 245:251 | 216:222 | Admixed                   |
| MLG269 | 1 | DEU057                                              | DEU (1)              | Leaf (1)        | HDP (1)                    | 124:127   | 120:120   | 195:195   | 145:147 | 205:205 | 241:251 | 216:219 | Eu1                       |
| MLG270 | 1 | DEU058                                              | DEU (1)              | Leaf (1)        | HDP (1)                    | 124:127   | 132:132   | 195:198   | 145:147 | 205:205 | 241:251 | 216:222 | Admixed                   |
| MLG271 | 7 | DEU059,<br>DEU061,<br>DEU064,<br>DEU066,<br>DEU067, | DEU (7)              | Leaf (7)        | HDP (7)                    | 124:127   | 132:132   | 195:207   | 143:145 | 202:205 | 251:253 | 222:222 | Eu1                       |

| MLG    | N | Sample(s)<br>Code <sup>1</sup>                                                      | Country <sup>2</sup> | Feeding<br>form | Host<br>plant <sup>3</sup> | PhyIII_55 | PhyIII_30 | PhyIII_36 | DV8     | Dvit6   | DVSSR4  | DV4     | Genetic<br>group<br>(K=2) |
|--------|---|-------------------------------------------------------------------------------------|----------------------|-----------------|----------------------------|-----------|-----------|-----------|---------|---------|---------|---------|---------------------------|
|        |   | DEU068,<br>DEU069                                                                   |                      |                 |                            |           |           |           |         |         |         |         |                           |
| MLG272 | 3 | DEU060,<br>DEU062,<br>DEU063                                                        | DEU (3)              | Leaf (3)        | HDP (3)                    | 127:130   | 132:132   | 195:204   | 143:145 | 205:205 | 251:253 | 216:222 | Eu1                       |
| MLG273 | 4 | DEU065,<br>DEU088,<br>DEU090,<br>DEU092                                             | DEU (4)              | Leaf (4)        | HDP (4)                    | 124:127   | 132:132   | 198:198   | 145:145 | 202:202 | 245:251 | 216:222 | Admixed                   |
| MLG274 | 8 | DEU069,<br>DEU070,<br>DEU071,<br>DEU072,<br>DEU073,<br>DEU074,<br>DEU075,<br>DEU076 | DEU (8)              | Leaf (8)        | HDP (8)                    | 124:124   | 132:132   | 195:207   | 145:147 | 205:205 | 241:251 | 216:216 | Eu1                       |
| MLG275 | 1 | DEU077                                                                              | DEU (1)              | Leaf (1)        | HDP (1)                    | 124:130   | 132:132   | 195:195   | 143:145 | 205:205 | 245:245 | 213:222 | Eu1                       |
| MLG276 | 2 | DEU078,<br>DEU081                                                                   | DEU (2)              | Leaf (2)        | HDP (2)                    | 124:127   | 132:132   | 195:201   | 145:145 | 205:205 | 245:251 | 210:219 | Eu1                       |
| MLG277 | 1 | DEU079                                                                              | DEU (1)              | Leaf (1)        | HDP (1)                    | 127:127   | 132:132   | 195:207   | 145:145 | 205:205 | 251:253 | 222:222 | Eu1                       |
| MLG278 | 1 | DEU080                                                                              | DEU (1)              | Leaf (1)        | HDP (1)                    | 127:127   | 132:132   | 207:207   | 145:145 | 202:208 | 241:251 | 216:222 | Eu1                       |
| MLG279 | 1 | DEU082                                                                              | DEU (1)              | Leaf (1)        | HDP (1)                    | 124:130   | 132:132   | 204:204   | 145:147 | 202:205 | 251:251 | 210:222 | Admixed                   |
| MLG280 | 1 | DEU083                                                                              | DEU (1)              | Leaf (1)        | HDP (1)                    | 124:124   | 120:132   | 195:204   | 145:147 | 205:205 | 251:251 | 216:216 | Admixed                   |
| MLG281 | 1 | DEU084                                                                              | DEU (1)              | Leaf (1)        | HDP (1)                    | 124:130   | 132:132   | 195:207   | 143:145 | 205:208 | 245:245 | 213:222 | Eu1                       |
| MLG282 | 1 | DEU085                                                                              | DEU (1)              | Leaf (1)        | HDP (1)                    | 124:127   | 132:132   | 195:195   | 143:145 | 205:208 | 251:253 | 219:222 | Admixed                   |
| MLG283 | 1 | DEU086                                                                              | DEU (1)              | Leaf (1)        | HDP (1)                    | 124:130   | 132:132   | 195:207   | 143:145 | 202:205 | 251:251 | 216:222 | Eu1                       |
| MLG284 | 1 | DEU087                                                                              | DEU (1)              | Leaf (1)        | HDP (1)                    | 124:124   | 132:132   | 207:207   | 145:145 | 205:205 | 245:245 | 219:222 | Eu1                       |
| MLG285 | 1 | DEU091                                                                              | DEU (1)              | Leaf (1)        | HDP (1)                    | 124:124   | 132:132   | 195:207   | 143:145 | 202:205 | 251:251 | 219:222 | Eu1                       |
| MLG286 | 1 | DEU093                                                                              | DEU (1)              | Leaf (1)        | HDP (1)                    | 124:127   | 132:132   | 195:198   | 145:145 | 202:208 | 251:253 | 216:222 | Admixed                   |
| MLG287 | 1 | DEU094                                                                              | DEU (1)              | Leaf (1)        | Vvin (1)                   | 124:124   | 129:132   | 195:195   | 143:145 | 205:205 | 251:251 | 219:222 | Admixed                   |

| MLG    | N | Sample(s)<br>Code <sup>1</sup> | Country <sup>2</sup> | Feeding<br>form | Host<br>plant <sup>3</sup> | PhyIII_55 | PhyIII_30 | PhyIII_36 | DV8     | Dvit6   | DVSSR4  | DV4     | Genetic<br>group<br>(K=2) |
|--------|---|--------------------------------|----------------------|-----------------|----------------------------|-----------|-----------|-----------|---------|---------|---------|---------|---------------------------|
| MLG288 | 1 | DEU095                         | DEU (1)              | Leaf (1)        | Vvin (1)                   | 130:130   | 129:132   | 195:198   | 145:145 | 196:205 | 241:251 | 222:222 | Admixed                   |
| MLG289 | 1 | DEU096                         | DEU (1)              | Leaf (1)        | Vvin (1)                   | 127:130   | 132:132   | 195:201   | 143:145 | 196:202 | 251:253 | 216:222 | Eu1                       |
| MLG290 | 1 | DEU097                         | DEU (1)              | Root (1)        | Vvin (1)                   | 124:130   | 129:129   | 195:195   | 145:145 | 196:208 | 241:251 | 222:222 | Admixed                   |
| MLG291 | 1 | DEU098                         | DEU (1)              | Root (1)        | Vvin (1)                   | 124:130   | 129:129   | 195:195   | 145:145 | 208:208 | 241:251 | 222:222 | Eu2                       |
| MLG292 | 1 | DEU099                         | DEU (1)              | Leaf (1)        | Vvin (1)                   | 127:130   | 132:132   | 195:195   | 147:147 | 208:208 | 251:253 | 216:228 | Eu2                       |
| MLG293 | 1 | DEU100                         | DEU (1)              | Leaf (1)        | Vvin (1)                   | 130:130   | 129:132   | 195:207   | 143:145 | 202:208 | 251:253 | 216:228 | Admixed                   |
| MLG294 | 1 | DEU101                         | DEU (1)              | Leaf (1)        | Vvin (1)                   | 124:127   | 132:132   | 195:207   | 143:145 | 202:208 | 251:251 | 222:228 | Admixed                   |
| MLG295 | 1 | DEU102                         | DEU (1)              | Root (1)        | Vvin (1)                   | 127:130   | 132:132   | 204:207   | 143:145 | 202:208 | 245:251 | 216:222 | Admixed                   |
| MLG296 | 1 | DEU103                         | DEU (1)              | Root (1)        | Vvin (1)                   | 127:130   | 129:132   | 195:195   | 145:147 | 205:208 | 251:251 | 219:228 | Eu2                       |
| MLG297 | 1 | DEU104                         | DEU (1)              | Leaf (1)        | HDP (1)                    | 121:124   | 132:132   | 195:207   | 145:145 | 205:205 | 251:251 | 222:222 | Eu1                       |
| MLG298 | 1 | DEU105                         | DEU (1)              | Leaf (1)        | HDP (1)                    | 124:130   | 132:132   | 195:195   | 143:143 | 205:208 | 241:251 | 210:216 | Eu1                       |
| MLG299 | 1 | DEU106                         | DEU (1)              | Leaf (1)        | HDP (1)                    | 127:127   | 132:132   | 195:207   | 143:149 | 202:205 | 245:251 | 216:228 | Eu1                       |
| MLG300 | 1 | DEU107                         | DEU (1)              | Leaf (1)        | HDP (1)                    | 130:130   | 132:132   | 195:204   | 143:145 | 205:208 | 251:251 | 216:222 | Admixed                   |
| MLG301 | 1 | DEU108                         | DEU (1)              | Root (1)        | Vvin (1)                   | 124:130   | 132:132   | 195:210   | 143:145 | 208:208 | 251:251 | 219:222 | Admixed                   |
| MLG302 | 1 | DEU109                         | DEU (1)              | Leaf (1)        | HDP (1)                    | 124:124   | 129:132   | 195:195   | 143:145 | 202:205 | 245:251 | 210:213 | Admixed                   |
| MLG303 | 1 | DEU110                         | DEU (1)              | Leaf (1)        | HDP (1)                    | 127:127   | 129:132   | 195:195   | 147:147 | 202:202 | 245:251 | 213:216 | Admixed                   |
| MLG304 | 1 | DEU111                         | DEU (1)              | Leaf (1)        | HDP (1)                    | 121:121   | 120:129   | 195:198   | 143:147 | 196:202 | 251:253 | 210:222 | Admixed                   |
| MLG305 | 1 | DEU112                         | DEU (1)              | Leaf (1)        | HDP (1)                    | 127:127   | 120:132   | 195:198   | 143:147 | 202:205 | 251:251 | 210:222 | Admixed                   |
| MLG306 | 1 | DEU113                         | DEU (1)              | Root (1)        | HDP (1)                    | 121:127   | 132:132   | 195:195   | 143:145 | 202:208 | 245:251 | 216:222 | Admixed                   |
| MLG307 | 1 | DEU114                         | DEU (1)              | Leaf (1)        | Vvin (1)                   | 124:130   | 123:129   | 195:198   | 143:145 | 202:208 | 251:253 | 216:222 | Eu2                       |
| MLG308 | 2 | DEU115,<br>DEU116              | DEU (2)              | Leaf (2)        | Vvin (2)                   | 124:130   | 132:132   | 195:198   | 143:145 | 202:208 | 251:253 | 216:222 | Admixed                   |
| MLG309 | 1 | DEU117                         | DEU (1)              | Leaf (1)        | Vvin (1)                   | 124:130   | 132:132   | 195:198   | 145:145 | 202:208 | 251:253 | 216:222 | Admixed                   |
| MLG310 | 2 | CHE001,<br>CHE002              | CHE (2)              | Leaf (2)        | HDP (2)                    | 127:130   | 132:132   | 195:201   | 143:143 | 205:205 | 251:253 | 222:222 | Eu1                       |
| MLG311 | 1 | CHE003                         | CHE (1)              | Leaf (1)        | HDP (1)                    | 130:130   | 132:132   | 195:195   | 143:147 | 205:208 | -:-     | 222:222 | Admixed                   |
| MLG312 | 1 | CHE004                         | CHE (1)              | Leaf (1)        | Vvin (1)                   | 123:138   | 132:141   | 195:195   | 143:147 | 202:205 | 251:253 | 216:222 | Admixed                   |

| MLG    | N | Sample(s)<br>Code <sup>1</sup>                                 | Country <sup>2</sup> | Feeding<br>form       | Host<br>plant <sup>3</sup> | PhyIII_55 | PhyIII_30 | PhyIII_36 | DV8     | Dvit6   | DVSSR4  | DV4     | Genetic<br>group<br>(K=2) |
|--------|---|----------------------------------------------------------------|----------------------|-----------------------|----------------------------|-----------|-----------|-----------|---------|---------|---------|---------|---------------------------|
| MLG313 | 1 | CHE005                                                         | CHE (1)              | Leaf (1)              | Vvin (1)                   | 115:124   | 129:132   | 195:195   | -:-     | 202:202 | -:-     | 222:222 | Admixed                   |
| MLG314 | 2 | CHE006,<br>CHE009                                              | CHE (2)              | Leaf (2)              | Rts (2)                    | 124:124   | 132:132   | 195:195   | 145:145 | 202:208 | 245:251 | 219:222 | Admixed                   |
| MLG315 | 1 | CHE007                                                         | CHE (1)              | Leaf (1)              | Rts (1)                    | 124:124   | 129:132   | 195:195   | 145:145 | 202:202 | 251:251 | 219:219 | Admixed                   |
| MLG316 | 1 | CHE008                                                         | CHE (1)              | Leaf (1)              | Rts (1)                    | 124:124   | 132:132   | 195:210   | 143:145 | 196:202 | 241:251 | 219:219 | Eu1                       |
| MLG317 | 4 | CHE010,<br>CHE012,<br>CHE013,<br>CHE014                        | CHE (4)              | Leaf (4)              | HDP (4)                    | 124:130   | 129:132   | 195:195   | 143:143 | 202:208 | 251:251 | 216:219 | Admixed                   |
| MLG318 | 2 | CHE011,<br>CHE015                                              | CHE (2)              | Leaf (1),<br>Root (1) | HDP (2)                    | 121:127   | 132:132   | 195:195   | 143:143 | 205:205 | 251:251 | 216:222 | Admixed                   |
| MLG319 | 1 | CHE016                                                         | CHE (1)              | Root (1)              | HDP (1)                    | 127:127   | 132:132   | 195:195   | 143:145 | 202:202 | 251:251 | 210:216 | Admixed                   |
| MLG320 | 1 | CHE017                                                         | CHE (1)              | Root (1)              | HDP (1)                    | 124:127   | 129:129   | 195:195   | 143:145 | 205:205 | 245:253 | 219:222 | Admixed                   |
| MLG321 | 1 | CHE018                                                         | CHE (1)              | Root (1)              | HDP (1)                    | 124:130   | 129:132   | 195:195   | 147:147 | 202:205 | 251:251 | 219:222 | Admixed                   |
| MLG322 | 4 | CHE019,<br>CHE021,<br>CHE022,<br>CHE023                        | CHE (4)              | Leaf (4)              | HDP (4)                    | 121:124   | 129:132   | 195:207   | 143:145 | 202:208 | 251:251 | 222:222 | Admixed                   |
| MLG323 | 1 | CHE020                                                         | CHE (1)              | Leaf (1)              | HDP (1)                    | 124:127   | 132:132   | 195:207   | 145:145 | 208:208 | 251:253 | 210:222 | Eu1                       |
| MLG324 | 2 | CHE024,<br>CHE029                                              | CHE (2)              | Root (2)              | HDP (2)                    | 124:127   | 132:132   | 195:195   | 143:147 | 205:205 | 241:251 | 210:222 | Eu1                       |
| MLG325 | 2 | CHE025,<br>CHE044                                              | CHE (2)              | Root (2)              | HDP (2)                    | 124:130   | 132:132   | 195:195   | 143:145 | 202:205 | 251:251 | 216:219 | Admixed                   |
| MLG326 | 1 | CHE026                                                         | CHE (1)              | Root (1)              | HDP (1)                    | 124:130   | 129:132   | 195:195   | 143:145 | 205:208 | 251:251 | 219:219 | Admixed                   |
| MLG327 | 1 | CHE027                                                         | CHE (1)              | Root (1)              | HDP (1)                    | 121:121   | 132:132   | 195:195   | 143:145 | 196:208 | 245:253 | 210:222 | Eu1                       |
| MLG328 | 1 | CHE028                                                         | CHE (1)              | Root (1)              | HDP (1)                    | 121:121   | 132:132   | 195:207   | 145:145 | 202:205 | 245:251 | 210:210 | Eu1                       |
| MLG329 | 9 | CHE030,<br>CHE031,<br>CHE032,<br>CHE033,<br>CHE034,<br>CHE047, | CHE (9)              | Leaf (5),<br>Root (4) | HDP (9)                    | 121:124   | 129:132   | 195:195   | 143:143 | 202:205 | 251:251 | 210:222 | Admixed                   |

| MLG    | N | Sample(s)<br>Code <sup>1</sup>                     | Country <sup>2</sup> | Feeding<br>form | Host<br>plant <sup>3</sup> | PhyIII_55 | PhyIII_30 | PhyIII_36 | DV8     | Dvit6   | DVSSR4  | DV4     | Genetic<br>group<br>(K=2) |
|--------|---|----------------------------------------------------|----------------------|-----------------|----------------------------|-----------|-----------|-----------|---------|---------|---------|---------|---------------------------|
|        |   | CHE048,<br>CHE049,<br>CHE051                       |                      |                 |                            |           |           |           |         |         |         |         |                           |
| MLG330 | 1 | CHE035                                             | CHE (1)              | Root (1)        | HDP (1)                    | 121:124   | 129:132   | 195:195   | 143:143 | 202:205 | 251:251 | 222:222 | Admixed                   |
| MLG331 | 1 | CHE036                                             | CHE (1)              | Root (1)        | HDP (1)                    | 124:127   | 132:132   | 195:195   | 143:143 | 202:208 | 251:251 | 219:222 | Admixed                   |
| MLG332 | 1 | CHE037                                             | CHE (1)              | Root (1)        | HDP (1)                    | 124:127   | 132:132   | 195:195   | 143:143 | 202:208 | 251:251 | 219:219 | Admixed                   |
| MLG333 | 1 | CHE038                                             | CHE (1)              | Root (1)        | HDP (1)                    | 127:130   | 129:132   | 195:207   | 143:143 | 205:205 | 245:245 | 222:222 | Eu1                       |
| MLG334 | 2 | CHE039,<br>CHE040                                  | CHE (2)              | Root (2)        | HDP (2)                    | 121:124   | 132:132   | 195:195   | 143:145 | 202:205 | 251:253 | 210:210 | Eu1                       |
| MLG335 | 1 | CHE041                                             | CHE (1)              | Root (1)        | HDP (1)                    | 124:127   | 132:132   | 195:207   | 143:143 | 208:208 | 245:253 | 210:222 | Eu1                       |
| MLG336 | 1 | CHE042                                             | CHE (1)              | Root (1)        | HDP (1)                    | 124:127   | 132:132   | 183:195   | 145:147 | 205:205 | 251:253 | 216:216 | Admixed                   |
| MLG337 | 1 | CHE043                                             | CHE (1)              | Root (1)        | HDP (1)                    | 121:124   | 132:132   | 195:195   | 143:143 | 196:196 | 251:253 | 210:222 | Eu1                       |
| MLG338 | 1 | CHE045                                             | CHE (1)              | Root (1)        | HDP (1)                    | 121:124   | 129:132   | 183:195   | 143:143 | 202:205 | 251:251 | 210:222 | Admixed                   |
| MLG339 | 1 | CHE046                                             | CHE (1)              | Root (1)        | HDP (1)                    | 127:127   | 129:132   | 195:195   | 143:143 | 205:208 | 251:253 | 210:216 | Admixed                   |
| MLG340 | 1 | CHE050                                             | CHE (1)              | Root (1)        | HDP (1)                    | 127:127   | 132:132   | 195:204   | 143:147 | 196:205 | 245:253 | 216:222 | Eu1                       |
| MLG341 | 1 | CHE052                                             | CHE (1)              | Root (1)        | HDP (1)                    | 124:130   | 132:132   | 195:195   | 143:145 | 196:205 | 245:245 | 210:222 | Eu1                       |
| MLG342 | 5 | CHE053,<br>CHE054,<br>CHE055,<br>CHE056,<br>CHE057 | CHE (5)              | Leaf (5)        | RGV (5)                    | 124:124   | 132:135   | 195:195   | 143:145 | 202:205 | 241:245 | 210:222 | Admixed                   |
| MLG343 | 1 | CHE058                                             | CHE (1)              | Root (1)        | RGV (1)                    | 127:130   | 132:132   | 195:195   | 145:145 | 202:205 | 245:251 | 216:222 | Admixed                   |
| MLG344 | 1 | CHE059                                             | CHE (1)              | Root (1)        | RGV (1)                    | 130:130   | 132:132   | 195:195   | 143:147 | 202:202 | 251:251 | 222:222 | Admixed                   |
| MLG345 | 3 | CHE060,<br>CHE061,<br>CHE062                       | CHE (3)              | Root (3)        | RGV (3)                    | 127:127   | 132:135   | 195:195   | 143:145 | 202:208 | 241:251 | 210:222 | Admixed                   |
| MLG346 | 1 | CHE063                                             | CHE (1)              | Leaf (1)        | RGV (1)                    | 124:130   | 129:132   | 195:195   | 145:147 | 205:208 | 245:251 | 222:228 | Admixed                   |
| MLG347 | 2 | CHE064,<br>CHE065                                  | CHE (2)              | Leaf (2)        | RGV (2)                    | 127:130   | 129:135   | 195:195   | 145:145 | 205:208 | 241:251 | 219:222 | Admixed                   |
| MLG348 | 1 | CHE066                                             | CHE (1)              | Leaf (1)        | RGV (1)                    | 124:127   | 132:132   | 195:204   | 145:145 | 208:208 | 251:251 | 222:222 | Admixed                   |

| MLG    | N | Sample(s)<br>Code <sup>1</sup>                     | Country <sup>2</sup> | Feeding<br>form       | Host<br>plant <sup>3</sup> | PhyIII_55 | PhyIII_30 | PhyIII_36 | DV8     | Dvit6   | DVSSR4  | DV4     | Genetic<br>group<br>(K=2) |
|--------|---|----------------------------------------------------|----------------------|-----------------------|----------------------------|-----------|-----------|-----------|---------|---------|---------|---------|---------------------------|
| MLG349 | 1 | CHE067                                             | CHE (1)              | Leaf (1)              | RGV (1)                    | 124:127   | 132:132   | 195:204   | 145:145 | 208:208 | 251:251 | 219:222 | Admixed                   |
| MLG350 | 2 | CHE068,<br>CHE069                                  | CHE (2)              | Root (2)              | Vvin (2)                   | 124:127   | 132:132   | 195:195   | 147:147 | 202:208 | 251:253 | 219:222 | Admixed                   |
| MLG351 | 4 | CHE070,<br>CHE071,<br>CHE073,<br>CHE074            | CHE (4)              | Leaf (4)              | Vvin (4)                   | 127:130   | 132:132   | 195:195   | 145:147 | 205:208 | 251:251 | 216:222 | Admixed                   |
| MLG352 | 1 | CHE072                                             | CHE (1)              | Leaf (1)              | Vvin (1)                   | 124:127   | 132:132   | 195:195   | 143:143 | 202:208 | 241:251 | 222:222 | Admixed                   |
| MLG353 | 1 | CHE075                                             | CHE (1)              | Leaf (1)              | HDP (1)                    | 115:127   | 132:132   | 195:195   | 143:143 | 205:208 | 241:253 | 222:222 | Admixed                   |
| MLG354 | 1 | CHE076                                             | CHE (1)              | Leaf (1)              | HDP (1)                    | 127:130   | 132:132   | 195:201   | 145:147 | 205:205 | 241:251 | 222:222 | Eu1                       |
| MLG355 | 1 | CHE077                                             | CHE (1)              | Leaf (1)              | HDP (1)                    | 124:130   | 132:132   | 201:204   | 143:145 | 202:205 | 251:251 | 219:222 | Eu1                       |
| MLG356 | 1 | CHE078                                             | CHE (1)              | Leaf (1)              | HDP (1)                    | 130:130   | 129:132   | 195:195   | 145:147 | 205:208 | 251:253 | 216:222 | Admixed                   |
| MLG357 | 1 | CHE079                                             | CHE (1)              | Leaf (1)              | HDP (1)                    | 130:130   | 129:132   | 195:195   | 145:147 | 205:208 | 253:253 | 216:222 | Admixed                   |
| MLG358 | 1 | CHE080                                             | CHE (1)              | Root (1)              | HDP (1)                    | 127:130   | 132:132   | 195:201   | 143:147 | 205:208 | 241:251 | 219:222 | Eu1                       |
| MLG359 | 1 | CHE081                                             | CHE (1)              | Leaf (1)              | Vvin (1)                   | 127:130   | 129:132   | 195:204   | 143:145 | 202:208 | 251:251 | 219:222 | Admixed                   |
| MLG360 | 5 | CHE082,<br>CHE083,<br>CHE084,<br>CHE085,<br>CHE087 | CHE (5)              | Leaf (4),<br>Root (1) | Rts (1),<br>Vvin (4)       | 127:130   | 132:132   | 195:204   | 143:145 | 208:208 | 241:251 | 219:222 | Admixed                   |
| MLG361 | 1 | CHE086                                             | CHE (1)              | Root (1)              | Rts (1)                    | 127:127   | 132:132   | 195:195   | 143:145 | 205:205 | 241:251 | 219:222 | Eu1                       |
| MLG362 | 1 | CHE088                                             | CHE (1)              | Leaf (1)              | HDP (1)                    | 124:127   | 132:132   | 207:213   | 143:145 | 205:208 | 251:251 | 213:219 | Eu1                       |
| MLG363 | 1 | CHE089                                             | CHE (1)              | Leaf (1)              | HDP (1)                    | 121:127   | 129:132   | 195:195   | 143:145 | 202:202 | 251:251 | 213:222 | Admixed                   |
| MLG364 | 1 | CHE090                                             | CHE (1)              | Leaf (1)              | HDP (1)                    | 127:127   | 129:132   | 195:204   | 143:145 | 196:202 | 245:253 | 222:222 | Eu1                       |
| MLG365 | 1 | CHE091                                             | CHE (1)              | Leaf (1)              | HDP (1)                    | 121:124   | 132:132   | 195:195   | 143:145 | 208:208 | 251:253 | 219:222 | Admixed                   |
| MLG366 | 1 | CHE092                                             | CHE (1)              | Leaf (1)              | HDP (1)                    | 124:127   | 132:132   | 195:213   | 143:145 | 202:208 | 251:251 | 219:222 | Admixed                   |
| MLG367 | 2 | CHE093,<br>CHE094                                  | CHE (2)              | Leaf (2)              | HDP (2)                    | 124:127   | 132:132   | 195:213   | 143:145 | 202:208 | 251:251 | 222:222 | Admixed                   |
| MLG368 | 1 | CHE095                                             | CHE (1)              | Leaf (1)              | HDP (1)                    | 121:124   | 132:132   | 195:195   | 147:147 | 202:202 | 255:255 | 222:222 | Admixed                   |
| MLG369 | 1 | CHE096                                             | CHE (1)              | Leaf (1)              | HDP (1)                    | 121:124   | 132:132   | 195:195   | 145:145 | 202:202 | 251:251 | 222:222 | Admixed                   |



| MLG    | N  | Sample(s)<br>Code <sup>1</sup>                                           | Country <sup>2</sup> | Feeding<br>form | Host<br>plant <sup>3</sup> | PhyIII_55 | PhyIII_30 | PhyIII_36 | DV8     | Dvit6   | DVSSR4  | DV4     | Genetic<br>group<br>(K=2) |
|--------|----|--------------------------------------------------------------------------|----------------------|-----------------|----------------------------|-----------|-----------|-----------|---------|---------|---------|---------|---------------------------|
| MLG370 | 1  | CHE097                                                                   | CHE (1)              | Root (1)        | n.a. (1)                   | 124:127   | 132:132   | 195:195   | 143:145 | 202:202 | 251:251 | 222:222 | Admixed                   |
| MLG371 | 1  | CHE098                                                                   | CHE (1)              | Leaf (1)        | HDP (1)                    | 124:127   | 132:132   | 201:213   | 145:145 | 202:205 | 251:251 | 210:210 | Eu1                       |
| MLG372 | 4  | CHE099,<br>CHE100,<br>CHE101,<br>CHE102                                  | CHE (4)              | Leaf (4)        | HDP (4)                    | 124:127   | 132:132   | 195:201   | 143:147 | 205:205 | 251:251 | 210:210 | Eu1                       |
| MLG373 | 1  | CHE103                                                                   | CHE (1)              | Root (1)        | HDP (1)                    | 124:127   | 132:132   | 201:201   | 145:145 | 202:205 | 251:251 | 210:222 | Eu1                       |
| MLG374 | 7  | CHE104,<br>CHE105,<br>CHE106,<br>CHE107,<br>CHE109,<br>CHE110,<br>CHE111 | CHE (7)              | Root (7)        | HDP (7)                    | 124:127   | 132:132   | 195:201   | 145:145 | 205:205 | 251:253 | 222:222 | Eu1                       |
| MLG375 | 1  | CHE108                                                                   | CHE (1)              | Root (1)        | HDP (1)                    | 124:127   | 132:132   | 201:213   | 145:145 | 202:205 | 251:251 | 210:222 | Eu1                       |
| MLG376 | 5  | CHE112,<br>CHE113<br>CHE114,<br>CHE115,<br>CHE116                        | CHE (5)              | Leaf (5)        | Rts (5)                    | 124:130   | 132:132   | 201:201   | 143:145 | 205:205 | 241:251 | 222:222 | Eu1                       |
| MLG377 | 5  | CHE117,<br>CHE118,<br>CHE119,<br>CHE120,<br>CHE121                       | CHE (5)              | Leaf (5)        | HDP (5)                    | 127:133   | 132:132   | 195:207   | 145:145 | 202:205 | 251:253 | 222:222 | Admixed                   |
| MLG378 | 1  | CHE122                                                                   | CHE (1)              | Root (1)        | Rts (1)                    | 127:133   | 129:132   | 195:207   | 145:145 | 202:205 | 251:253 | 222:222 | Admixed                   |
| MLG379 | 4  | CHE123,<br>CHE124,<br>CHE125,<br>CHE126                                  | CHE (4)              | Root (4)        | Rts (4)                    | 127:133   | 129:132   | 195:207   | 145:147 | 202:205 | 251:253 | 222:222 | Admixed                   |
| MLG380 | 16 | CHE127,<br>CHE128,<br>CHE129,<br>HRV024,                                 | CHE (4),<br>HRV (12) | Leaf (16)       | HDP (4),<br>Rts (12)       | 124:130   | 132:132   | 195:204   | 145:145 | 202:202 | 251:251 | 222:222 | Admixed                   |

| MLG    | N | Sample(s)<br>Code <sup>1</sup>                                                                                       | Country <sup>2</sup> | Feeding<br>form | Host<br>plant <sup>3</sup> | PhyIII_55 | PhyIII_30 | PhyIII_36 | DV8     | Dvit6   | DVSSR4  | DV4     | Genetic<br>group<br>(K=2) |
|--------|---|----------------------------------------------------------------------------------------------------------------------|----------------------|-----------------|----------------------------|-----------|-----------|-----------|---------|---------|---------|---------|---------------------------|
|        |   | HRV025,<br>HRV027,<br>HRV028,<br>HRV029,<br>HRV030,<br>HRV031,<br>HRV032,<br>HRV033,<br>HRV035,<br>HRV036,<br>HRV044 |                      |                 |                            |           |           |           |         |         |         |         |                           |
| MLG381 | 6 | CHE131,<br>CHE132,<br>CHE133,<br>CHE134,<br>CHE135,<br>CHE141                                                        | CHE (6)              | Leaf (6)        | HDP (5),<br>Vvin (1)       | 121:130   | 129:132   | 195:204   | 145:145 | 202:208 | 251:251 | 222:222 | Admixed                   |
| MLG382 | 2 | CHE136,<br>CHE137                                                                                                    | CHE (2)              | Leaf (2)        | Vvin (2)                   | 115:124   | 129:132   | 195:207   | 143:143 | 202:202 | 251:251 | 222:222 | Admixed                   |
| MLG383 | 1 | CHE138                                                                                                               | CHE (1)              | Leaf (1)        | Vvin (1)                   | 124:130   | 129:132   | 195:204   | 143:145 | 202:202 | 251:251 | 222:222 | Admixed                   |
| MLG384 | 1 | CHE139                                                                                                               | CHE (1)              | Leaf (1)        | Vvin (1)                   | 130:130   | 129:132   | 204:204   | 143:145 | 202:208 | 251:251 | 222:222 | Admixed                   |
| MLG385 | 2 | CHE140,<br>CHE142                                                                                                    | CHE (2)              | Leaf (2)        | Vvin (2)                   | 124:130   | 132:132   | 195:195   | 143:145 | 202:208 | 251:251 | 213:222 | Admixed                   |
| MLG386 | 1 | CHE143                                                                                                               | CHE (1)              | Leaf (1)        | Vvin (1)                   | 124:130   | 132:132   | 195:195   | 143:145 | 202:208 | 251:253 | 213:222 | Admixed                   |
| MLG387 | 2 | CHE144,<br>CHE145                                                                                                    | CHE (2)              | Leaf (2)        | n.a. (2)                   | 124:124   | 129:132   | 195:195   | 145:147 | 202:202 | 251:251 | 210:210 | Admixed                   |
| MLG388 | 1 | CHE146                                                                                                               | CHE (1)              | Leaf (1)        | n.a. (1)                   | 124:130   | 132:132   | 195:204   | 143:145 | 202:202 | 251:251 | 210:222 | Admixed                   |
| MLG389 | 1 | CHE147                                                                                                               | CHE (1)              | Leaf (1)        | n.a. (1)                   | 130:130   | 129:132   | 195:195   | 143:145 | 202:205 | 241:253 | 210:210 | Admixed                   |
| MLG390 | 1 | CHE148                                                                                                               | CHE (1)              | Leaf (1)        | HDP (1)                    | 124:130   | 129:132   | 183:195   | 143:147 | 202:205 | 251:251 | 219:219 | Admixed                   |
| MLG391 | 1 | CHE149                                                                                                               | CHE (1)              | Leaf (1)        | HDP (1)                    | 115:124   | 132:132   | 195:195   | 143:143 | 202:202 | 251:251 | 222:222 | Admixed                   |
| MLG392 | 1 | CHE150                                                                                                               | CHE (1)              | Leaf (1)        | HDP (1)                    | 124:130   | 129:132   | 183:195   | 143:147 | 202:205 | 251:251 | 219:222 | Admixed                   |
| MLG393 | 1 | CHE151                                                                                                               | CHE (1)              | Leaf (1)        | HDP (1)                    | 127:127   | 132:135   | 195:195   | 143:145 | 202:208 | 251:253 | 216:222 | Admixed                   |

| MLG    | N | Sample(s)<br>Code <sup>1</sup>                                           | Country <sup>2</sup> | Feeding<br>form | Host<br>plant <sup>3</sup> | PhyIII_55 | PhyIII_30 | PhyIII_36 | DV8     | Dvit6   | DVSSR4  | DV4     | Genetic<br>group<br>(K=2) |
|--------|---|--------------------------------------------------------------------------|----------------------|-----------------|----------------------------|-----------|-----------|-----------|---------|---------|---------|---------|---------------------------|
| MLG394 | 7 | CHE152,<br>CHE154,<br>CHE155,<br>CHE156,<br>CHE157,<br>CHE158,<br>CHE159 | CHE (7)              | Leaf (7)        | HDP (5),<br>Rts (2)        | 124:130   | 132:132   | 183:195   | 143:147 | 205:205 | 251:253 | 219:222 | Admixed                   |
| MLG395 | 1 | CHE153                                                                   | CHE (1)              | Leaf (1)        | Rts (1)                    | 124:130   | 132:132   | 195:204   | 143:147 | 202:202 | 245:251 | 222:222 | Admixed                   |
| MLG396 | 4 | CHE160,<br>CHE161,<br>CHE162,<br>CHE163                                  | CHE (4)              | Leaf (4)        | HDP (4)                    | 124:127   | 132:135   | 195:195   | 143:145 | 202:208 | 241:253 | 210:222 | Admixed                   |
| MLG397 | 1 | CHE164                                                                   | CHE (1)              | Leaf (1)        | HDP (1)                    | 124:127   | 132:135   | 201:201   | 143:145 | 202:208 | 241:253 | 210:222 | Eu1                       |
| MLG398 | 1 | CHE165                                                                   | CHE (1)              | Leaf (1)        | HDP (1)                    | 124:130   | 132:132   | 195:195   | 143:145 | 205:208 | 249:249 | 216:219 | Eu1                       |
| MLG399 | 1 | CHE166                                                                   | CHE (1)              | Leaf (1)        | HDP (1)                    | 124:130   | 132:132   | 195:195   | 143:145 | 205:208 | 251:251 | 219:222 | Admixed                   |
| MLG400 | 1 | CHE167                                                                   | CHE (1)              | Leaf (1)        | Rts (1)                    | 124:130   | 132:132   | 195:207   | 145:147 | 202:202 | 251:251 | 210:219 | Admixed                   |
| MLG401 | 1 | CHE168                                                                   | CHE (1)              | Leaf (1)        | Rts (1)                    | 124:124   | 132:132   | 183:195   | 143:147 | 202:205 | 253:253 | 219:222 | Admixed                   |
| MLG402 | 1 | CHE169                                                                   | CHE (1)              | Leaf (1)        | Rts (1)                    | 124:130   | 132:132   | 195:207   | 143:143 | 202:202 | 251:253 | 219:219 | Admixed                   |
| MLG403 | 1 | CHE170                                                                   | CHE (1)              | Leaf (1)        | Rts (1)                    | 124:127   | 132:132   | 195:207   | 143:143 | 202:202 | 251:251 | 210:219 | Eu1                       |
| MLG404 | 1 | CHE171                                                                   | CHE (1)              | Leaf (1)        | Rts (1)                    | 124:124   | 132:132   | 195:204   | 145:145 | 202:202 | 251:251 | 222:222 | Admixed                   |
| MLG405 | 1 | CHE172                                                                   | CHE (1)              | Leaf (1)        | Rts (1)                    | 124:127   | 132:132   | 195:213   | 143:147 | 205:205 | 251:251 | 210:210 | Eu1                       |
| MLG406 | 1 | CHE173                                                                   | CHE (1)              | Leaf (1)        | Rts (1)                    | 127:130   | 132:132   | 195:195   | 147:147 | 202:205 | 251:251 | 210:222 | Admixed                   |
| MLG407 | 4 | CHE174,<br>CHE176,<br>CHE177,<br>CHE178                                  | CHE (4)              | Leaf (4)        | HDP (4)                    | 130:130   | 129:132   | 195:201   | 143:145 | 202:202 | 245:251 | 219:222 | Admixed                   |
| MLG408 | 1 | CHE175                                                                   | CHE (1)              | Leaf (1)        | HDP (1)                    | 130:130   | 129:132   | 195:201   | 143:145 | 202:202 | 251:253 | 219:222 | Admixed                   |
| MLG409 | 4 | CHE179,<br>CHE180,<br>CHE183,<br>CHE184                                  | CHE (4)              | Root (4)        | HDP (4)                    | 127:130   | 120:132   | 195:195   | 143:143 | 202:205 | 251:251 | 222:222 | Admixed                   |

| MLG    | N | Sample(s)<br>Code <sup>1</sup>          | Country <sup>2</sup> | Feeding<br>form | Host<br>plant <sup>3</sup> | PhyIII_55 | PhyIII_30 | PhyIII_36 | DV8     | Dvit6   | DVSSR4  | DV4     | Genetic<br>group<br>(K=2) |
|--------|---|-----------------------------------------|----------------------|-----------------|----------------------------|-----------|-----------|-----------|---------|---------|---------|---------|---------------------------|
| MLG410 | 2 | CHE181,<br>CHE182                       | CHE (2)              | Root (2)        | HDP (2)                    | 127:130   | 120:132   | 195:195   | 143:143 | 205:208 | 257:257 | 225:225 | Eu1                       |
| MLG411 | 1 | CHE185                                  | CHE (1)              | Root (1)        | HDP (1)                    | 127:130   | 120:132   | 195:195   | 143:143 | 202:205 | 249:249 | 219:219 | Eu1                       |
| MLG412 | 1 | CHE186                                  | CHE (1)              | Leaf (1)        | HDP (1)                    | 127:127   | 129:132   | 195:207   | 145:145 | 205:205 | 253:253 | 219:222 | Eu1                       |
| MLG413 | 1 | CHE187                                  | CHE (1)              | Leaf (1)        | HDP (1)                    | 127:127   | 129:132   | 195:207   | 145:145 | 205:205 | 241:253 | 219:222 | Eu1                       |
| MLG414 | 1 | CHE188                                  | CHE (1)              | Leaf (1)        | HDP (1)                    | 127:127   | 132:132   | 195:207   | 143:145 | 202:205 | 241:253 | 219:222 | Eu1                       |
| MLG415 | 1 | CHE189                                  | CHE (1)              | Leaf (1)        | HDP (1)                    | 127:130   | 132:132   | 195:207   | 145:145 | 202:205 | 241:253 | 219:222 | Eu1                       |
| MLG416 | 1 | CHE190                                  | CHE (1)              | Leaf (1)        | HDP (1)                    | 127:130   | 129:132   | 195:207   | 145:145 | 202:205 | 241:253 | 219:222 | Eu1                       |
| MLG417 | 3 | CHE191,<br>CHE197,<br>CHE198            | CHE (3)              | Root (3)        | Rts (3)                    | 127:130   | 132:132   | 195:207   | 145:145 | 202:205 | 253:253 | 219:222 | Eu1                       |
| MLG418 | 1 | CHE192                                  | CHE (1)              | Root (1)        | Rts (1)                    | 130:130   | 129:132   | 195:207   | 143:145 | 202:202 | 251:253 | 219:222 | Admixed                   |
| MLG419 | 1 | CHE193                                  | CHE (1)              | Root (1)        | Rts (1)                    | 127:130   | 132:132   | 207:207   | 143:145 | 202:205 | 241:253 | 219:222 | Eu1                       |
| MLG420 | 2 | CHE194,<br>CHE195                       | CHE (2)              | Root (2)        | Rts (2)                    | 124:127   | 132:132   | 195:207   | 145:145 | 202:205 | 241:245 | 219:219 | Eu1                       |
| MLG421 | 1 | CHE196                                  | CHE (1)              | Root (1)        | Rts (1)                    | 127:130   | 132:132   | 195:195   | 145:145 | 202:205 | 241:251 | 219:222 | Admixed                   |
| MLG422 | 1 | CHE199                                  | CHE (1)              | Root (1)        | Rts (1)                    | 127:130   | 132:132   | 195:207   | 145:145 | 202:205 | 245:253 | 219:222 | Eu1                       |
| MLG423 | 1 | CHE200                                  | CHE (1)              | Root (1)        | Rts (1)                    | 127:130   | 132:132   | 195:207   | 145:145 | 202:205 | 243:251 | 216:219 | Eu1                       |
| MLG424 | 1 | CHE201                                  | CHE (1)              | Leaf (1)        | HDP (1)                    | 124:130   | 132:132   | 195:195   | 145:145 | 202:202 | 251:253 | 222:222 | Admixed                   |
| MLG425 | 1 | CHE202                                  | CHE (1)              | Leaf (1)        | HDP (1)                    | 124:127   | 132:132   | 195:204   | 145:145 | 202:208 | 251:253 | 222:222 | Admixed                   |
| MLG426 | 1 | CHE203                                  | CHE (1)              | Leaf (1)        | HDP (1)                    | 124:127   | 132:132   | 195:207   | 145:145 | 202:202 | 241:251 | 219:222 | Eu1                       |
| MLG427 | 1 | CHE204                                  | CHE (1)              | Leaf (1)        | HDP (1)                    | 130:130   | 132:132   | 195:207   | 145:145 | 202:205 | 251:253 | 222:222 | Eu1                       |
| MLG428 | 1 | CHE205                                  | CHE (1)              | Leaf (1)        | HDP (1)                    | 130:130   | 132:132   | 195:195   | 143:145 | 202:202 | 251:251 | 219:219 | Admixed                   |
| MLG429 | 1 | CHE207                                  | CHE (1)              | Root (1)        | HDP (1)                    | 130:130   | 132:132   | 195:204   | 143:145 | 205:208 | 241:253 | 222:222 | Admixed                   |
| MLG430 | 4 | CHE208,<br>CHE209,<br>CHE210,<br>CHE211 | CHE (4)              | Root (4)        | HDP (4)                    | 130:130   | 132:132   | 195:207   | 143:145 | 202:205 | 241:251 | 219:222 | Eu1                       |
| MLG431 | 1 | CHE212                                  | CHE (1)              | Root (1)        | HDP (1)                    | 127:130   | 132:132   | 195:195   | 143:145 | 202:202 | 251:253 | 219:222 | Admixed                   |

| MLG    | N | Sample(s)<br>Code <sup>1</sup> | Country <sup>2</sup> | Feeding<br>form | Host<br>plant <sup>3</sup> | PhyIII_55 | PhyIII_30 | PhyIII_36 | DV8     | Dvit6   | DVSSR4  | DV4     | Genetic<br>group<br>(K=2) |
|--------|---|--------------------------------|----------------------|-----------------|----------------------------|-----------|-----------|-----------|---------|---------|---------|---------|---------------------------|
| MLG432 | 1 | CHE213                         | CHE (1)              | Root (1)        | HDP (1)                    | 127:130   | 129:132   | 195:195   | 143:145 | 202:202 | 251:251 | 219:219 | Admixed                   |
| MLG433 | 1 | CHE214                         | CHE (1)              | Root (1)        | HDP (1)                    | 130:130   | 132:132   | 195:207   | 145:145 | 202:202 | 241:251 | 219:219 | Admixed                   |
| MLG434 | 1 | CHE215                         | CHE (1)              | Root (1)        | HDP (1)                    | 121:124   | 132:132   | 195:204   | 145:145 | 202:208 | 251:253 | 222:222 | Admixed                   |
| MLG435 | 1 | CHE216                         | CHE (1)              | Leaf (1)        | HDP (1)                    | 124:130   | 132:132   | 195:207   | 145:145 | 208:208 | 241:253 | 219:222 | Admixed                   |
| MLG436 | 1 | CHE217                         | CHE (1)              | Leaf (1)        | HDP (1)                    | 127:130   | 132:132   | 207:213   | 145:145 | 202:208 | 241:241 | 222:222 | Eu1                       |
| MLG437 | 1 | CHE218                         | CHE (1)              | Leaf (1)        | HDP (1)                    | 124:127   | 132:132   | 207:207   | 143:145 | 208:208 | 251:253 | 222:222 | Eu1                       |
| MLG438 | 1 | CHE219                         | CHE (1)              | Leaf (1)        | HDP (1)                    | 124:124   | 132:132   | 195:195   | 145:145 | 196:196 | 251:251 | 222:222 | Eu1                       |
| MLG439 | 1 | CHE220                         | CHE (1)              | Leaf (1)        | HDP (1)                    | 130:130   | 132:132   | 213:213   | 145:145 | 202:202 | 241:241 | 222:222 | Admixed                   |
| MLG440 | 1 | CHE221                         | CHE (1)              | Leaf (1)        | HDP (1)                    | 124:130   | 132:132   | 195:195   | 143:145 | 196:202 | 251:251 | 222:222 | Eu1                       |
| MLG441 | 3 | CHE222,<br>CHE228,<br>CHE229   | CHE (3)              | Root (3)        | Rts (3)                    | 124:127   | 132:132   | 195:207   | 145:145 | 202:208 | 241:253 | 222:222 | Eu1                       |
| MLG442 | 1 | CHE223                         | CHE (1)              | Root (1)        | Rts (1)                    | 127:130   | 132:132   | 195:213   | 143:145 | 196:202 | 241:251 | 222:222 | Eu1                       |
| MLG443 | 1 | CHE224                         | CHE (1)              | Root (1)        | Rts (1)                    | 124:124   | 132:132   | 195:207   | 143:145 | 196:208 | 251:253 | 222:222 | Eu1                       |
| MLG444 | 1 | CHE225                         | CHE (1)              | Root (1)        | Rts (1)                    | 124:130   | 132:132   | 201:207   | 143:145 | 205:208 | 251:253 | 222:222 | Eu1                       |
| MLG445 | 2 | CHE226,<br>CHE227              | CHE (2)              | Root (2)        | Rts (2)                    | 130:130   | 132:132   | 195:207   | 143:145 | 196:208 | 241:251 | 219:222 | Eu1                       |
| MLG446 | 1 | CHE230                         | CHE (1)              | Root (1)        | Rts (1)                    | 124:130   | 132:132   | 195:195   | 143:145 | 196:202 | 241:241 | 222:222 | Eu1                       |
| MLG447 | 1 | CHE231                         | CHE (1)              | Root (1)        | Rts (1)                    | 124:124   | 132:132   | 195:213   | 145:147 | 208:208 | 251:253 | 216:222 | Admixed                   |
| MLG448 | 1 | CHE232                         | CHE (1)              | Leaf (1)        | HDP (1)                    | 127:127   | 132:132   | 195:207   | 143:147 | 202:205 | 251:253 | 210:219 | Eu1                       |
| MLG449 | 1 | CHE233                         | CHE (1)              | Leaf (1)        | HDP (1)                    | 124:127   | 132:132   | 195:207   | 143:145 | 202:202 | 251:251 | 210:219 | Eu1                       |
| MLG450 | 2 | CHE234,<br>CHE235              | CHE (2)              | Leaf (2)        | HDP (2)                    | 124:124   | 132:132   | 183:204   | 143:145 | 205:205 | 251:251 | 219:222 | Admixed                   |
| MLG451 | 1 | CHE236                         | CHE (1)              | Leaf (1)        | HDP (1)                    | 127:130   | 132:132   | 195:204   | 143:145 | 205:205 | 251:253 | 210:219 | Eu1                       |
| MLG452 | 1 | CHE237                         | CHE (1)              | Root (1)        | Rts (1)                    | 124:124   | 132:132   | 195:195   | 143:145 | 202:205 | 251:251 | 210:219 | Eu1                       |
| MLG453 | 1 | CHE238                         | CHE (1)              | Root (1)        | Rts (1)                    | 124:124   | 132:132   | 204:204   | 143:145 | 205:205 | 253:253 | 219:219 | Eu1                       |
| MLG454 | 1 | CHE239                         | CHE (1)              | Root (1)        | Rts (1)                    | 124:127   | 129:132   | 195:195   | 143:147 | 202:205 | 251:253 | 210:222 | Admixed                   |
| MLG455 | 1 | CHE240                         | CHE (1)              | Root (1)        | Rts (1)                    | 124:130   | 129:132   | 195:204   | 143:143 | 202:205 | 251:251 | 210:222 | Admixed                   |

| MLG    | N | Sample(s)<br>Code <sup>1</sup>                                                      | Country <sup>2</sup> | Feeding<br>form       | Host<br>plant <sup>3</sup> | PhyIII_55 | PhyIII_30 | PhyIII_36 | DV8     | Dvit6   | DVSSR4  | DV4     | Genetic<br>group<br>(K=2) |
|--------|---|-------------------------------------------------------------------------------------|----------------------|-----------------------|----------------------------|-----------|-----------|-----------|---------|---------|---------|---------|---------------------------|
| MLG456 | 1 | CHE241                                                                              | CHE (1)              | Root (1)              | Rts (1)                    | 124:124   | 132:132   | 195:195   | 145:145 | 205:205 | 251:251 | 216:216 | Admixed                   |
| MLG457 | 4 | CHE242,<br>CHE244,<br>CHE245,<br>CHE246                                             | CHE (4)              | Leaf (4)              | HDP (4)                    | 124:130   | 132:132   | 195:195   | 143:147 | 202:205 | 251:251 | 213:219 | Admixed                   |
| MLG458 | 1 | CHE243                                                                              | CHE (1)              | Leaf (1)              | HDP (1)                    | 115:130   | 132:132   | 195:195   | 143:147 | 202:205 | 251:251 | 213:219 | Admixed                   |
| MLG459 | 1 | CHE247                                                                              | CHE (1)              | Root (1)              | Rts (1)                    | 115:130   | 132:132   | 195:195   | 143:143 | 202:205 | 251:253 | 219:222 | Admixed                   |
| MLG460 | 1 | CHE248                                                                              | CHE (1)              | Root (1)              | Rts (1)                    | 115:130   | 132:132   | 195:195   | 143:147 | 202:205 | 251:251 | 222:222 | Admixed                   |
| MLG461 | 2 | CHE249,<br>CHE251                                                                   | CHE (2)              | Root (2)              | Rts (2)                    | 115:130   | 132:132   | 195:195   | 143:147 | 202:202 | 251:251 | 213:213 | Eu2                       |
| MLG462 | 1 | CHE250                                                                              | CHE (1)              | Root (1)              | Rts (1)                    | 124:130   | 132:132   | 195:195   | 143:143 | 202:202 | 241:251 | 213:219 | Admixed                   |
| MLG463 | 5 | CHE252,<br>CHE253,<br>CHE254,<br>CHE255,<br>CHE258                                  | CHE (5)              | Leaf (4),<br>Root (1) | HDP (5)                    | 121:130   | 132:132   | 195:195   | 143:147 | 202:202 | 245:251 | 222:225 | Admixed                   |
| MLG464 | 1 | CHE256                                                                              | CHE (1)              | Leaf (1)              | HDP (1)                    | 130:130   | 132:132   | 195:195   | 145:145 | 202:202 | 245:251 | 222:225 | Admixed                   |
| MLG465 | 2 | CHE257,<br>CHE259                                                                   | CHE (2)              | Root (2)              | HDP (2)                    | 124:130   | 132:132   | 195:195   | 143:147 | 202:202 | 241:251 | 222:222 | Admixed                   |
| MLG466 | 1 | CHE260                                                                              | CHE (1)              | Root (1)              | HDP (1)                    | 124:124   | 132:132   | 195:195   | 145:147 | 196:205 | 247:247 | 210:228 | Eu1                       |
| MLG467 | 1 | CHE261                                                                              | CHE (1)              | Root (1)              | HDP (1)                    | 121:124   | 132:132   | 195:195   | 145:147 | 202:202 | 251:253 | 219:222 | Admixed                   |
| MLG468 | 1 | CHE262                                                                              | CHE (1)              | Leaf (1)              | HDP (1)                    | 130:130   | 132:132   | 195:201   | 145:147 | 208:208 | 245:251 | 222:222 | Admixed                   |
| MLG469 | 8 | CHE263,<br>CHE264,<br>CHE265,<br>CHE266,<br>CHE267,<br>CHE268,<br>CHE269,<br>CHE270 | CHE (8)              | Leaf (4),<br>Root (4) | HDP (4),<br>Rts (4)        | 121:127   | 132:132   | 195:201   | 145:147 | 208:208 | 245:251 | 222:222 | Admixed                   |
| MLG470 | 1 | CHE271                                                                              | CHE (1)              | Leaf (1)              | HDP (1)                    | 121:130   | 132:132   | 195:195   | 145:145 | 208:208 | 251:251 | 222:228 | Eu2                       |

| MLG    | N | Sample(s)<br>Code <sup>1</sup>          | Country <sup>2</sup> | Feeding<br>form | Host<br>plant <sup>3</sup> | PhyIII_55 | PhyIII_30 | PhyIII_36 | DV8     | Dvit6   | DVSSR4  | DV4     | Genetic<br>group<br>(K=2) |
|--------|---|-----------------------------------------|----------------------|-----------------|----------------------------|-----------|-----------|-----------|---------|---------|---------|---------|---------------------------|
| MLG471 | 2 | CHE272,<br>CHE273                       | CHE (2)              | Leaf (2)        | HDP (2)                    | 130:130   | 132:132   | 195:213   | 145:145 | 208:208 | 251:251 | 222:222 | Admixed                   |
| MLG472 | 1 | CHE274                                  | CHE (1)              | Leaf (1)        | HDP (1)                    | 127:130   | 132:135   | 195:213   | 143:145 | 202:202 | 251:251 | 222:228 | Eu2                       |
| MLG473 | 1 | CHE275                                  | CHE (1)              | Leaf (1)        | HDP (1)                    | 130:130   | 135:135   | 195:195   | 143:143 | 205:208 | 251:251 | 222:222 | Eu2                       |
| MLG474 | 1 | CHE276                                  | CHE (1)              | Root (1)        | HDP (1)                    | 124:130   | 132:132   | 195:195   | 143:145 | 205:208 | 251:251 | 222:222 | Admixed                   |
| MLG475 | 3 | CHE277,<br>CHE280,<br>HUN023            | CHE (2),<br>HUN (1)  | Leaf (3)        | HDP (2),<br>Rts (1)        | 127:130   | 132:132   | 195:195   | 145:145 | 202:208 | 251:251 | 222:222 | Admixed                   |
| MLG476 | 1 | CHE278                                  | CHE (1)              | Leaf (1)        | HDP (1)                    | 121:127   | 132:132   | 195:195   | 145:145 | 205:208 | 251:253 | 222:222 | Admixed                   |
| MLG477 | 1 | CHE279                                  | CHE (1)              | Leaf (1)        | HDP (1)                    | 130:130   | 132:135   | 195:195   | 143:145 | 208:208 | 245:251 | 216:222 | Eu2                       |
| MLG478 | 2 | CHE281,<br>CHE283                       | CHE (2)              | Leaf (2)        | Rts (2)                    | 115:121   | 129:132   | 195:195   | 143:147 | 202:208 | 251:251 | 222:222 | Eu2                       |
| MLG479 | 1 | CHE282                                  | CHE (1)              | Leaf (1)        | Rts (1)                    | 115:121   | 129:132   | 201:201   | 143:147 | 202:208 | 251:251 | 222:222 | Admixed                   |
| MLG480 | 1 | URY001                                  | URY (1)              | Leaf (1)        | Vvin (1)                   | 124:130   | 129:130   | 207:210   | 145:145 | 205:205 | 253:253 | 216:222 | Eu1                       |
| MLG481 | 1 | URY002                                  | URY (1)              | Leaf (1)        | Vvin (1)                   | 130:130   | 132:132   | 195:201   | 145:145 | 205:205 | 253:253 | 216:222 | Eu1                       |
| MLG482 | 1 | URY003                                  | URY (1)              | Leaf (1)        | Vvin (1)                   | 130:130   | 132:132   | 195:201   | 143:143 | 205:205 | 245:245 | 216:219 | Eu1                       |
| MLG483 | 1 | URY004                                  | URY (1)              | Leaf (1)        | Vvin (1)                   | 124:130   | 129:132   | 207:210   | 145:145 | 205:205 | 253:253 | 216:222 | Eu1                       |
| MLG484 | 3 | URY005,<br>URY006,<br>URY007            | URY (3)              | Leaf (3)        | Vvin (3)                   | 124:124   | 132:132   | 195:207   | 143:145 | 202:205 | 251:253 | 216:222 | Eu1                       |
| MLG485 | 1 | URY008                                  | URY (1)              | Leaf (1)        | Vvin (1)                   | 124:130   | 132:132   | 195:201   | 143:143 | 205:205 | 245:251 | 210:216 | Eu1                       |
| MLG486 | 1 | URY009                                  | URY (1)              | Leaf (1)        | Vvin (1)                   | 124:124   | 132:132   | 195:201   | 143:143 | 202:205 | 241:253 | 210:219 | Eu1                       |
| MLG487 | 2 | URY010,<br>URY011                       | URY (2)              | Leaf (2)        | Vvin (2)                   | 124:127   | 132:132   | 195:207   | 143:143 | 202:205 | 251:253 | 222:222 | Eu1                       |
| MLG488 | 2 | URY012,<br>URY014                       | URY (2)              | Leaf (2)        | Vvin (2)                   | 124:124   | 132:132   | 195:207   | 143:145 | 205:205 | 245:253 | 210:216 | Eu1                       |
| MLG489 | 1 | URY013                                  | URY (1)              | Leaf (1)        | Vvin (1)                   | 127:127   | 132:135   | 195:195   | 143:143 | 202:205 | 253:253 | 216:216 | Admixed                   |
| MLG490 | 4 | URY015,<br>URY017,<br>URY018,<br>URY019 | URY (4)              | Leaf (4)        | Vvin (4)                   | 124:124   | 132:132   | 207:210   | 145:145 | 202:205 | 251:253 | 210:216 | Eu1                       |

| MLG    | N | Sample(s)<br>Code <sup>1</sup>                     | Country <sup>2</sup> | Feeding<br>form | Host<br>plant <sup>3</sup> | PhyIII_55 | PhyIII_30 | PhyIII_36 | DV8     | Dvit6   | DVSSR4  | DV4     | Genetic<br>group<br>(K=2) |
|--------|---|----------------------------------------------------|----------------------|-----------------|----------------------------|-----------|-----------|-----------|---------|---------|---------|---------|---------------------------|
| MLG491 | 1 | URY016                                             | URY (1)              | Leaf (1)        | Vvin (1)                   | 124:130   | 132:132   | 195:195   | 143:147 | 202:205 | 245:253 | 216:222 | Admixed                   |
| MLG492 | 2 | URY020,<br>URY021                                  | URY (2)              | Leaf (2)        | Vvin (2)                   | 130:130   | 129:132   | 195:201   | 143:147 | 205:208 | 251:253 | 219:222 | Admixed                   |
| MLG493 | 2 | URY022,<br>URY023                                  | URY (2)              | Leaf (2)        | Vvin (2)                   | 124:127   | 132:132   | 195:210   | 143:147 | 196:196 | 253:253 | 216:222 | Eu1                       |
| MLG494 | 1 | URY024                                             | URY (1)              | Leaf (1)        | Vvin (1)                   | 124:127   | 132:132   | 195:210   | 143:149 | 196:196 | 253:253 | 216:222 | Eu1                       |
| MLG495 | 2 | URY025,<br>URY026                                  | URY (2)              | Leaf (2)        | Vvin (2)                   | 124:124   | 132:132   | 195:207   | 143:143 | 205:208 | 241:253 | 210:219 | Eu1                       |
| MLG496 | 1 | URY027                                             | URY (1)              | Leaf (1)        | Vvin (1)                   | 124:127   | 132:132   | 207:210   | 143:145 | 202:205 | 251:253 | 216:216 | Eu1                       |
| MLG497 | 1 | URY028                                             | URY (1)              | Leaf (1)        | Vvin (1)                   | 124:127   | 132:132   | 195:195   | 145:147 | 205:205 | 253:253 | 210:219 | Eu1                       |
| MLG498 | 1 | URY029                                             | URY (1)              | Leaf (1)        | Vvin (1)                   | 124:130   | 132:132   | 195:195   | 147:147 | 205:205 | 245:253 | 210:216 | Eu1                       |
| MLG499 | 5 | URY030,<br>URY031,<br>URY032,<br>URY033,<br>URY034 | URY (5)              | Leaf (5)        | Vvin (5)                   | 124:127   | 132:132   | 195:210   | 143:147 | 205:205 | 253:253 | 210:216 | Eu1                       |
| MLG500 | 2 | URY035,<br>URY036                                  | URY (2)              | Leaf (2)        | Vvin (2)                   | 124:130   | 132:132   | 195:195   | 143:143 | 205:205 | 253:253 | 210:216 | Eu1                       |
| MLG501 | 1 | URY037                                             | URY (1)              | Leaf (1)        | Vvin (1)                   | 124:130   | 132:132   | 195:195   | 143:145 | 202:205 | 251:253 | 216:216 | Admixed                   |
| MLG502 | 1 | URY038                                             | URY (1)              | Leaf (1)        | Vvin (1)                   | 124:127   | 132:132   | 195:195   | 143:145 | 202:205 | 251:251 | 216:219 | Admixed                   |
| MLG503 | 2 | URY039,<br>URY040                                  | URY (2)              | Leaf (2)        | Vvin (2)                   | 127:130   | 129:132   | 195:195   | 143:143 | 205:208 | 253:253 | 216:219 | Admixed                   |
| MLG504 | 3 | URY041,<br>URY043,<br>URY044                       | URY (3)              | Leaf (3)        | Vvin (3)                   | 130:130   | 129:132   | 195:198   | 143:143 | 205:205 | 241:253 | 219:219 | Admixed                   |
| MLG505 | 1 | URY042                                             | URY (1)              | Leaf (1)        | Vvin (1)                   | -:-       | 132:132   | 195:195   | 143:145 | 205:205 | 253:253 | 216:219 | Eu1                       |
| MLG506 | 1 | SRB001                                             | SRB (1)              | Leaf (1)        | RGV (1)                    | 130:130   | 132:135   | 195:204   | 143:149 | 205:208 | -:-     | 219:219 | Admixed                   |
| MLG507 | 1 | SRB002                                             | SRB (1)              | Leaf (1)        | RGV (1)                    | 124:130   | 132:141   | 195:195   | 143:143 | 205:205 | -:-     | 216:225 | Admixed                   |
| MLG508 | 1 | SRB003                                             | SRB (1)              | Leaf (1)        | RGV (1)                    | 124:130   | 132:141   | 195:198   | 145:145 | -:-     | -:-     | -:-     | Admixed                   |
| MLG509 | 1 | SRB004                                             | SRB (1)              | Root (1)        | RGV (1)                    | 124:127   | 132:141   | 195:195   | 143:145 | 205:208 | 251:251 | 210:222 | Admixed                   |
| MLG510 | 1 | SRB005                                             | SRB (1)              | Leaf (1)        | RGV (1)                    | 127:130   | 129:141   | 195:195   | 145:145 | 202:205 | 251:251 | 222:222 | Admixed                   |



| MLG    | N | Sample(s)<br>Code <sup>1</sup> | Country <sup>2</sup> | Feeding<br>form      | Host<br>plant <sup>3</sup> | PhyIII_55 | PhyIII_30 | PhyIII_36 | DV8     | Dvit6   | DVSSR4  | DV4     | Genetic<br>group<br>(K=2) |
|--------|---|--------------------------------|----------------------|----------------------|----------------------------|-----------|-----------|-----------|---------|---------|---------|---------|---------------------------|
| MLG511 | 1 | SRB006                         | SRB (1)              | Leaf (1)             | RGV (1)                    | 127:130   | 132:132   | 195:195   | 143:143 | 202:208 | 251:251 | 216:222 | Admixed                   |
| MLG512 | 1 | SRB007                         | SRB (1)              | Leaf (1)             | RGV (1)                    | 124:127   | 129:141   | 195:198   | -:-     | 202:205 | -:-     | -:-     | Admixed                   |
| MLG513 | 1 | SRB008                         | SRB (1)              | Leaf (1)             | RGV (1)                    | 124:130   | 132:135   | 195:198   | 143:145 | 202:202 | 241:241 | 219:228 | Admixed                   |
| MLG514 | 1 | SRB009                         | SRB (1)              | Leaf (1)             | RGV (1)                    | 127:130   | 129:141   | 195:195   | 145:145 | 202:205 | 251:251 | 210:222 | Admixed                   |
| MLG515 | 2 | SRB010,<br>SRB011              | SRB (2)              | Leaf (2)             | RGV (2)                    | 124:130   | 132:135   | 195:204   | 143:145 | 205:205 | 251:251 | 210:216 | Admixed                   |
| MLG516 | 1 | SRB012                         | SRB (1)              | Root (1)             | Rts (1)                    | -:-       | 132:135   | 195:198   | 145:145 | 202:202 | 251:251 | 219:219 | Eu2                       |
| MLG517 | 1 | SRB013                         | SRB (1)              | Root (1)             | Rts (1)                    | 124:127   | 129:132   | 195:195   | 143:145 | 202:205 | -:-     | 216:222 | Admixed                   |
| MLG518 | 1 | SRB014                         | SRB (1)              | Leaf (1)             | Rts (1)                    | 124:136   | 123:132   | 195:198   | 143:145 | -:-     | -:-     | 216:216 | Admixed                   |
| MLG519 | 1 | SRB015                         | SRB (1)              | Leaf (1)             | Rts (1)                    | 118:124   | 123:123   | 204:204   | -:-     | 208:208 | -:-     | -:-     | Admixed                   |
| MLG520 | 1 | SRB016                         | SRB (1)              | Root (1)             | Rts (1)                    | 127:127   | 132:132   | 195:195   | 143:145 | 202:202 | 251:251 | 219:219 | Admixed                   |
| MLG521 | 3 | SRB017,<br>SRB023,<br>SRB025   | SRB (3)              | Leaf (2),<br>Root(1) | Rts (3)                    | 130:130   | 129:132   | 195:195   | 143:145 | 202:208 | 251:253 | 216:219 | Eu2                       |
| MLG522 | 1 | SRB018                         | SRB (1)              | Root (1)             | Rts (1)                    | 127:130   | 129:132   | -:-       | 145:147 | 208:208 | 251:251 | 210:216 | Admixed                   |
| MLG523 | 1 | SRB019                         | SRB (1)              | Root (1)             | Rts (1)                    | 127:130   | 129:132   | 195:195   | 145:147 | 208:208 | 251:251 | 210:216 | Admixed                   |
| MLG524 | 3 | SRB020,<br>SRB021,<br>SRB022   | SRB (3)              | Root (3)             | Rts (3)                    | 130:130   | 132:135   | 195:204   | 143:145 | 205:208 | 241:251 | 216:219 | Admixed                   |
| MLG525 | 1 | SRB024                         | SRB (1)              | Leaf (1)             | Rts (1)                    | 124:130   | 129:132   | -:-       | 143:145 | 202:208 | -:-     | -:-     | Admixed                   |
| MLG526 | 2 | SRB026,<br>SRB027              | SRB (2)              | Leaf (2)             | Rts (2)                    | 127:130   | 129:132   | 195:195   | 143:145 | 202:205 | 241:251 | 219:228 | Admixed                   |
| MLG527 | 1 | SRB028                         | SRB (1)              | Leaf (1)             | Rts (1)                    | 124:130   | 129:129   | 195:195   | 145:145 | 202:202 | 251:251 | 219:222 | Eu2                       |
| MLG528 | 1 | SRB029                         | SRB (1)              | Leaf (1)             | Rts (1)                    | 124:130   | 129:129   | 195:195   | 145:145 | 202:202 | -:-     | 219:219 | Eu2                       |
| MLG529 | 1 | SRB030                         | SRB (1)              | Leaf (1)             | Rts (1)                    | -:-       | 129:129   | 195:195   | 145:145 | 202:202 | 251:251 | 219:228 | Eu2                       |
| MLG530 | 1 | SRB031                         | SRB (1)              | Leaf (1)             | Vvin (1)                   | 127:130   | 132:132   | 195:204   | 145:145 | 208:208 | 241:251 | 219:219 | Admixed                   |
| MLG531 | 1 | SRB032                         | SRB (1)              | Leaf (1)             | Vvin (1)                   | 124:130   | 129:135   | 195:204   | 143:145 | 205:208 | 251:251 | 219:222 | Eu2                       |
| MLG532 | 1 | SRB033                         | SRB (1)              | Leaf (1)             | Vvin (1)                   | 124:127   | 132:132   | -:-       | 143:143 | 202:208 | 251:251 | 219:222 | Admixed                   |

| MLG    | N | Sample(s)<br>Code <sup>1</sup> | Country <sup>2</sup> | Feeding<br>form | Host<br>plant <sup>3</sup> | PhyIII_55 | PhyIII_30 | PhyIII_36 | DV8     | Dvit6   | DVSSR4  | DV4     | Genetic<br>group<br>(K=2) |
|--------|---|--------------------------------|----------------------|-----------------|----------------------------|-----------|-----------|-----------|---------|---------|---------|---------|---------------------------|
| MLG533 | 2 | SRB034,<br>SRB035              | SRB (2)              | Leaf (2)        | Vvin (2)                   | 130:130   | 129:132   | 195:195   | 143:145 | 202:208 | -:-     | 216:219 | Eu2                       |
| MLG534 | 1 | SRB036                         | SRB (1)              | Leaf (1)        | RGV (1)                    | 124:127   | 132:132   | 195:195   | 145:145 | 202:202 | -:-     | 222:222 | Admixed                   |
| MLG535 | 1 | SRB037                         | SRB (1)              | Leaf (1)        | RGV (1)                    | 124:127   | 132:141   | 195:195   | 145:145 | 202:208 | 241:251 | 222:222 | Admixed                   |
| MLG536 | 1 | SRB038                         | SRB (1)              | Root (1)        | RGV (1)                    | 130:130   | 132:135   | 195:195   | 143:143 | 208:208 | 251:251 | 219:219 | Eu2                       |
| MLG537 | 1 | SRB039                         | SRB (1)              | Root (1)        | Vvin (1)                   | 130:130   | 132:135   | 195:198   | 145:147 | 202:208 | -:-     | 219:222 | Eu2                       |
| MLG538 | 1 | ITA001                         | ITA (1)              | Leaf (1)        | Rts (1)                    | 115:130   | 132:132   | 195:198   | 143:143 | 202:202 | 241:251 | 210:216 | Admixed                   |
| MLG539 | 2 | ITA002,<br>ITA045              | ITA (2)              | Leaf (2)        | Rts (2)                    | 115:130   | 132:135   | 195:195   | 143:145 | 202:205 | 251:253 | 210:216 | Admixed                   |
| MLG540 | 1 | ITA003                         | ITA (1)              | Leaf (1)        | Rts (1)                    | 124:130   | 132:132   | 195:198   | 145:145 | 202:205 | 245:251 | 210:222 | Admixed                   |
| MLG541 | 2 | ITA004,<br>ITA006              | ITA (2)              | Leaf (2)        | Rts (2)                    | 130:130   | 132:132   | 195:198   | 143:145 | 202:205 | 251:251 | 222:222 | Admixed                   |
| MLG542 | 1 | ITA005                         | ITA (1)              | Leaf (1)        | Rts (1)                    | 127:130   | 132:132   | 195:204   | 143:145 | 202:202 | 251:253 | 210:210 | Eu1                       |
| MLG543 | 1 | ITA007                         | ITA (1)              | Leaf (1)        | Rts (1)                    | 130:130   | 132:132   | 195:195   | 143:145 | 202:205 | 251:253 | 210:210 | Eu1                       |
| MLG544 | 2 | ITA008,<br>ITA010              | ITA (2)              | Leaf (2)        | Rts (2)                    | 124:124   | 132:132   | 195:195   | 143:145 | 202:202 | 241:251 | 219:219 | Admixed                   |
| MLG545 | 1 | ITA009                         | ITA (1)              | Leaf (1)        | Rts (1)                    | 124:127   | 129:132   | 195:195   | 143:143 | 196:205 | 241:253 | 210:210 | Eu1                       |
| MLG546 | 1 | ITA011                         | ITA (1)              | Leaf (1)        | Rts (1)                    | 124:130   | 132:132   | 195:195   | 143:143 | 202:208 | 251:253 | 210:219 | Admixed                   |
| MLG547 | 1 | ITA012                         | ITA (1)              | Leaf (1)        | Vvin (1)                   | 124:136   | 132:132   | 195:195   | 143:145 | -:-     | -:-     | 216:225 | Admixed                   |
| MLG548 | 1 | ITA013                         | ITA (1)              | Leaf (1)        | Vvin (1)                   | 130:130   | 132:132   | 195:195   | 143:143 | 202:208 | 251:253 | 210:210 | Admixed                   |
| MLG549 | 2 | ITA014,<br>ITA015              | ITA (2)              | Leaf (2)        | Rts (2)                    | 130:130   | 129:132   | 195:198   | 143:143 | 205:205 | 251:253 | 210:216 | Admixed                   |
| MLG550 | 1 | ITA016                         | ITA (1)              | Leaf (1)        | Rts (1)                    | 124:127   | 129:132   | 195:195   | 143:143 | 202:208 | 251:253 | 210:216 | Admixed                   |
| MLG551 | 1 | ITA017                         | ITA (1)              | Leaf (1)        | Vvin (1)                   | 130:130   | 132:132   | 195:207   | 143:145 | 205:205 | 251:253 | 222:228 | Admixed                   |
| MLG552 | 1 | ITA018                         | ITA (1)              | Leaf (1)        | Vvin (1)                   | 130:130   | 132:132   | 195:195   | 143:145 | 205:205 | 253:255 | 222:228 | Admixed                   |
| MLG553 | 1 | ITA019                         | ITA (1)              | Leaf (1)        | Vvin (1)                   | 124:124   | 132:132   | 195:198   | 145:147 | 205:205 | 251:251 | 216:222 | Admixed                   |
| MLG554 | 1 | ITA020                         | ITA (1)              | Leaf (1)        | Vvin (1)                   | 124:124   | 132:132   | 195:198   | 143:145 | 205:205 | 251:251 | 216:222 | Admixed                   |
| MLG555 | 1 | ITA021                         | ITA (1)              | Leaf (1)        | Vvin (1)                   | 130:133   | 132:132   | 195:204   | 143:143 | 202:208 | 245:251 | 216:222 | Admixed                   |

| MLG    | N | Sample(s)<br>Code <sup>1</sup>          | Country <sup>2</sup> | Feeding<br>form | Host<br>plant <sup>3</sup> | PhyIII_55 | PhyIII_30 | PhyIII_36 | DV8     | Dvit6   | DVSSR4  | DV4     | Genetic<br>group<br>(K=2) |
|--------|---|-----------------------------------------|----------------------|-----------------|----------------------------|-----------|-----------|-----------|---------|---------|---------|---------|---------------------------|
| MLG556 | 3 | ITA022,<br>ITA025,<br>ITA026            | ITA (3)              | Leaf (3)        | Rts (3)                    | 124:124   | 132:132   | 195:195   | 143:145 | 202:202 | 251:251 | 210:216 | Admixed                   |
| MLG557 | 3 | ITA023,<br>ITA024,<br>ITA032            | ITA (3)              | Leaf (3)        | Rts (3)                    | 130:130   | 132:135   | 195:195   | 143:143 | 202:208 | 251:253 | 210:222 | Admixed                   |
| MLG558 | 4 | ITA027,<br>ITA029,<br>ITA030,<br>ITA031 | ITA (4)              | Leaf (4)        | Rts (4)                    | 124:124   | 132:132   | 195:195   | 143:145 | 202:202 | 251:251 | 210:222 | Eu1                       |
| MLG559 | 1 | ITA028                                  | ITA (1)              | Leaf (1)        | Rts (1)                    | 124:124   | 132:132   | 195:195   | 143:147 | 202:202 | 251:251 | 210:222 | Admixed                   |
| MLG560 | 3 | ITA033,<br>ITA035,<br>ITA036            | ITA (3)              | Leaf (3)        | Rts (3)                    | 124:124   | 132:132   | 195:195   | 143:145 | 205:205 | 253:253 | 210:210 | Eu1                       |
| MLG561 | 1 | ITA034                                  | ITA (1)              | Leaf (1)        | Rts (1)                    | 115:127   | 132:135   | 195:195   | 145:145 | 202:208 | 245:253 | 210:216 | Admixed                   |
| MLG562 | 3 | ITA037,<br>ITA038,<br>ITA041            | ITA (3)              | Leaf (3)        | Rts (3)                    | 124:127   | 132:132   | 195:195   | 143:143 | 202:205 | 251:251 | 210:219 | Eu1                       |
| MLG563 | 2 | ITA039,<br>ITA040                       | ITA (2)              | Leaf (2)        | Rts (2)                    | 124:127   | 132:132   | 195:195   | 145:145 | 202:205 | 251:251 | 210:219 | Eu1                       |
| MLG564 | 1 | ITA042                                  | ITA (1)              | Leaf (1)        | Rts (1)                    | 130:130   | 129:132   | 192:195   | 143:143 | 202:202 | 251:253 | 210:210 | Admixed                   |
| MLG565 | 2 | ITA043,<br>ITA044                       | ITA (2)              | Leaf (2)        | Rts (2)                    | 130:130   | 129:132   | 195:195   | 143:143 | 202:202 | 251:253 | 210:210 | Admixed                   |
| MLG566 | 1 | ITA046                                  | ITA (1)              | Leaf (1)        | Rts (1)                    | 115:130   | 132:135   | 198:198   | 143:143 | 202:202 | 241:251 | 210:216 | Eu2                       |
| MLG567 | 1 | ITA047                                  | ITA (1)              | Leaf (1)        | Rts (1)                    | 115:130   | 132:132   | 195:198   | 145:145 | 202:202 | 241:251 | 210:216 | Admixed                   |
| MLG568 | 1 | ITA048                                  | ITA (1)              | Leaf (1)        | Rts (1)                    | 124:130   | 132:135   | 195:195   | 147:147 | 205:208 | 249:251 | 210:222 | Admixed                   |
| MLG569 | 1 | ITA049                                  | ITA (1)              | Leaf (1)        | Rts (1)                    | 124:130   | 132:135   | 195:195   | 145:145 | 205:208 | 251:253 | 210:222 | Admixed                   |
| MLG570 | 1 | ITA050                                  | ITA (1)              | Leaf (1)        | Rts (1)                    | 127:130   | 120:135   | 195:195   | 145:145 | 202:208 | 251:251 | 219:219 | Admixed                   |
| MLG571 | 1 | ITA051                                  | ITA (1)              | Leaf (1)        | Rts (1)                    | 121:130   | 132:135   | 195:195   | 145:145 | 205:208 | 251:253 | 210:222 | Admixed                   |
| MLG572 | 1 | ITA052                                  | ITA (1)              | Leaf (1)        | Rts (1)                    | 124:130   | 132:135   | 195:195   | 145:145 | 205:208 | 249:251 | 210:222 | Admixed                   |
| MLG573 | 1 | ITA053                                  | ITA (1)              | Leaf (1)        | Vvin (1)                   | 124:133   | 132:132   | 195:195   | 143:145 | 208:208 | 253:253 | 216:222 | Admixed                   |

| MLG    | N | Sample(s)<br>Code <sup>1</sup> | Country <sup>2</sup> | Feeding<br>form | Host<br>plant <sup>3</sup> | PhyIII_55 | PhyIII_30 | PhyIII_36 | DV8     | Dvit6   | DVSSR4  | DV4     | Genetic<br>group<br>(K=2) |
|--------|---|--------------------------------|----------------------|-----------------|----------------------------|-----------|-----------|-----------|---------|---------|---------|---------|---------------------------|
| MLG574 | 1 | ITA054                         | ITA (1)              | Leaf (1)        | Vvin (1)                   | 130:130   | 129:132   | 195:207   | 147:147 | 202:208 | 253:253 | 219:222 | Admixed                   |
| MLG575 | 1 | ITA055                         | ITA (1)              | Leaf (1)        | Vvin (1)                   | 130:130   | 132:132   | 195:207   | 143:143 | 205:208 | 245:253 | 222:228 | Admixed                   |
| MLG576 | 1 | ITA056                         | ITA (1)              | Leaf (1)        | Vvin (1)                   | 124:130   | 132:135   | 195:207   | 147:147 | 205:208 | 251:253 | 219:219 | Admixed                   |
| MLG577 | 1 | ITA057                         | ITA (1)              | Leaf (1)        | Vvin (1)                   | 121:127   | 132:132   | 195:195   | 143:145 | 205:205 | 245:251 | 222:222 | Eu1                       |
| MLG578 | 1 | ITA058                         | ITA (1)              | Leaf (1)        | Vvin (1)                   | 127:130   | 129:135   | 195:204   | 143:145 | 202:202 | 251:251 | 216:216 | Eu2                       |
| MLG579 | 1 | ITA059                         | ITA (1)              | Leaf (1)        | Vvin (1)                   | 124:130   | 129:132   | 195:207   | 143:147 | 208:208 | 245:251 | 222:222 | Admixed                   |
| MLG580 | 1 | ITA060                         | ITA (1)              | Leaf (1)        | Vvin (1)                   | 124:124   | 132:132   | 204:207   | 143:143 | 202:202 | 245:251 | 222:222 | Eu1                       |
| MLG581 | 1 | ITA061                         | ITA (1)              | Leaf (1)        | Vvin (1)                   | 124:130   | 132:132   | 195:207   | 147:147 | 208:208 | 251:251 | 219:222 | Admixed                   |
| MLG582 | 1 | ITA062                         | ITA (1)              | Leaf (1)        | Vvin (1)                   | 127:130   | 132:132   | 195:195   | 147:147 | 208:208 | 251:253 | 216:222 | Admixed                   |
| MLG583 | 1 | ITA063                         | ITA (1)              | Leaf (1)        | Vvin (1)                   | 127:130   | 129:132   | 195:207   | 143:143 | 202:202 | 251:251 | 216:222 | Admixed                   |
| MLG584 | 1 | ITA064                         | ITA (1)              | Leaf (1)        | Vvin (1)                   | 127:130   | 132:132   | 195:207   | 143:143 | 208:208 | 251:251 | 216:216 | Admixed                   |
| MLG585 | 1 | ITA065                         | ITA (1)              | Leaf (1)        | Vvin (1)                   | 130:130   | 132:132   | 195:207   | 145:145 | 202:202 | 245:251 | 210:216 | Admixed                   |
| MLG586 | 1 | ITA066                         | ITA (1)              | Leaf (1)        | Vvin (1)                   | 124:130   | 132:132   | 195:195   | 143:145 | 202:208 | 245:251 | 210:222 | Admixed                   |
| MLG587 | 1 | ITA067                         | ITA (1)              | Leaf (1)        | Vvin (1)                   | 124:130   | 132:132   | 195:207   | 145:147 | 208:208 | 251:251 | 210:222 | Admixed                   |
| MLG588 | 1 | ITA068                         | ITA (1)              | Leaf (1)        | Vvin (1)                   | 130:130   | 135:141   | 195:198   | 145:145 | 202:205 | 251:251 | 216:222 | Eu2                       |
| MLG589 | 1 | ITA069                         | ITA (1)              | Leaf (1)        | Vvin (1)                   | 127:130   | 132:141   | 195:195   | 143:143 | 205:208 | 251:251 | 216:216 | Admixed                   |
| MLG590 | 1 | ITA070                         | ITA (1)              | Leaf (1)        | Vvin (1)                   | 124:130   | 135:135   | 195:195   | 145:145 | 205:208 | 251:253 | 216:219 | Eu2                       |
| MLG591 | 1 | ITA071                         | ITA (1)              | Leaf (1)        | Vvin (1)                   | 130:130   | 132:132   | 195:207   | 147:147 | 208:208 | 251:251 | 210:222 | Admixed                   |
| MLG592 | 1 | ITA072                         | ITA (1)              | Leaf (1)        | Vvin (1)                   | 130:130   | 132:132   | 195:207   | 143:145 | 205:205 | 251:251 | 210:210 | Eu1                       |
| MLG593 | 1 | ITA073                         | ITA (1)              | Leaf (1)        | Vvin (1)                   | 124:127   | 132:132   | 195:207   | 143:145 | 205:208 | 245:251 | 210:222 | Eu1                       |
| MLG594 | 1 | ITA074                         | ITA (1)              | Leaf (1)        | Vvin (1)                   | 130:133   | 132:141   | 195:195   | 145:145 | 202:208 | 245:245 | 222:228 | Eu2                       |
| MLG595 | 1 | ITA075                         | ITA (1)              | Leaf (1)        | Vvin (1)                   | 130:130   | 132:132   | 207:207   | 145:145 | 202:202 | 251:251 | 210:219 | Eu1                       |
| MLG596 | 1 | ITA076                         | ITA (1)              | Leaf (1)        | Vvin (1)                   | 124:130   | 132:132   | 195:207   | 143:145 | 196:202 | 251:251 | 210:222 | Eu1                       |
| MLG597 | 1 | ITA077                         | ITA (1)              | Leaf (1)        | Vvin (1)                   | 130:133   | 132:132   | 195:195   | 143:145 | 202:208 | 245:253 | 219:222 | Admixed                   |
| MLG598 | 1 | ITA078                         | ITA (1)              | Leaf (1)        | Vvin (1)                   | 130:130   | 132:132   | 195:195   | 143:145 | 205:208 | 251:251 | 210:222 | Admixed                   |
| MLG599 | 1 | ITA079                         | ITA (1)              | Leaf (1)        | Vvin (1)                   | 130:130   | 132:132   | 195:195   | 143:143 | 205:205 | 251:253 | 210:228 | Admixed                   |

| MLG    | N | Sample(s)<br>Code <sup>1</sup>                                           | Country <sup>2</sup> | Feeding<br>form | Host<br>plant <sup>3</sup> | PhyIII_55 | PhyIII_30 | PhyIII_36 | DV8     | Dvit6   | DVSSR4  | DV4     | Genetic<br>group<br>(K=2) |
|--------|---|--------------------------------------------------------------------------|----------------------|-----------------|----------------------------|-----------|-----------|-----------|---------|---------|---------|---------|---------------------------|
| MLG600 | 7 | ZAF001,<br>ZAF002,<br>ZAF003,<br>ZAF004,<br>ZAF005,<br>ZAF006,<br>ZAF007 | ZAF (7)              | Leaf (7)        | Rts (7)                    | 127:136   | 123:132   | 192:195   | 145:151 | 202:205 | 251:251 | 216:225 | Admixed                   |
| MLG601 | 1 | ZAF008                                                                   | ZAF (1)              | Leaf (1)        | Rts (1)                    | 127:127   | 123:132   | 192:195   | 145:151 | 202:205 | 251:251 | 216:225 | Admixed                   |
| MLG602 | 1 | HUN001                                                                   | HUN (1)              | Leaf (1)        | Rts (1)                    | 124:130   | 129:132   | 195:195   | 143:145 | 202:202 | 219:222 | 216:216 | Admixed                   |
| MLG603 | 1 | HUN002                                                                   | HUN (1)              | Leaf (1)        | Rts (1)                    | 127:130   | 129:129   | 195:195   | 145:145 | 202:208 | 251:251 | 216:222 | Eu2                       |
| MLG604 | 1 | HUN003                                                                   | HUN (1)              | Leaf (1)        | Rts (1)                    | 127:127   | 132:132   | 195:195   | 145:145 | 202:202 | 251:251 | 216:222 | Admixed                   |
| MLG605 | 1 | HUN004                                                                   | HUN (1)              | Leaf (1)        | Rts (1)                    | 127:130   | 132:132   | 195:204   | 145:147 | 202:208 | 251:251 | 210:222 | Admixed                   |
| MLG606 | 1 | HUN005                                                                   | HUN (1)              | Leaf (1)        | Rts (1)                    | 124:130   | 132:135   | 195:195   | 145:145 | 202:202 | 251:251 | 216:216 | Eu2                       |
| MLG607 | 1 | HUN006                                                                   | HUN (1)              | Leaf (1)        | Rts (1)                    | 124:124   | 132:132   | 195:204   | 143:145 | 202:208 | 251:251 | 216:219 | Admixed                   |
| MLG608 | 1 | HUN007                                                                   | HUN (1)              | Root (1)        | Rts (1)                    | 124:130   | 129:135   | 195:198   | 143:147 | 202:208 | 251:251 | 222:222 | Eu2                       |
| MLG609 | 1 | HUN008                                                                   | HUN (1)              | Leaf (1)        | Rts (1)                    | 124:127   | 129:132   | 195:195   | 143:147 | 202:202 | 251:251 | 216:222 | Admixed                   |
| MLG610 | 1 | HUN009                                                                   | HUN (1)              | Leaf (1)        | Rts (1)                    | 127:130   | 132:135   | 195:198   | 143:145 | 208:208 | 251:251 | 210:222 | Eu2                       |
| MLG611 | 1 | HUN010                                                                   | HUN (1)              | Leaf (1)        | Rts (1)                    | 124:130   | 123:132   | 195:204   | 143:145 | 205:205 | 241:251 | 210:210 | Eu1                       |
| MLG612 | 1 | HUN011                                                                   | HUN (1)              | Root (1)        | Rts (1)                    | 124:124   | 129:132   | 195:222   | 143:145 | 205:208 | 251:251 | 219:219 | Admixed                   |
| MLG613 | 1 | HUN012                                                                   | HUN (1)              | Root (1)        | Rts (1)                    | 124:124   | 129:132   | 195:222   | 143:145 | 205:208 | 251:251 | 210:219 | Admixed                   |
| MLG614 | 1 | HUN013                                                                   | HUN (1)              | Root (1)        | Rts (1)                    | 130:130   | 132:132   | 195:195   | 143:145 | 205:205 | 251:251 | 210:222 | Eu1                       |
| MLG615 | 1 | HUN014                                                                   | HUN (1)              | Leaf (1)        | Rts (1)                    | 124:130   | 132:132   | 195:222   | 143:145 | 202:208 | 251:251 | 216:222 | Admixed                   |
| MLG616 | 1 | HUN015                                                                   | HUN (1)              | Leaf (1)        | Rts (1)                    | 124:124   | 129:132   | 195:195   | 145:145 | 202:202 | 245:251 | 222:228 | Admixed                   |
| MLG617 | 1 | HUN016                                                                   | HUN (1)              | Leaf (1)        | Rts (1)                    | 127:130   | 129:132   | 195:195   | 143:145 | 202:202 | 251:251 | 210:222 | Admixed                   |
| MLG618 | 1 | HUN017                                                                   | HUN (1)              | Root (1)        | Rts (1)                    | 127:130   | 132:132   | 195:195   | 145:147 | 202:208 | 251:251 | 222:228 | Admixed                   |
| MLG619 | 1 | HUN018                                                                   | HUN (1)              | Root (1)        | Rts (1)                    | 130:130   | 132:132   | 204:204   | 145:147 | 202:202 | 251:251 | 210:216 | Admixed                   |
| MLG620 | 1 | HUN019                                                                   | HUN (1)              | Root (1)        | Rts (1)                    | 127:130   | 129:132   | 195:195   | 143:143 | 202:202 | 251:251 | 210:222 | Admixed                   |
| MLG621 | 1 | HUN020                                                                   | HUN (1)              | Root (1)        | Rts (1)                    | 127:130   | 132:132   | 195:195   | 145:145 | 202:208 | 245:251 | 222:222 | Admixed                   |

| MLG    | N | Sample(s)<br>Code <sup>1</sup> | Country <sup>2</sup> | Feeding<br>form | Host<br>plant <sup>3</sup> | PhyIII_55 | PhyIII_30 | PhyIII_36 | DV8     | Dvit6   | DVSSR4  | DV4     | Genetic<br>group<br>(K=2) |
|--------|---|--------------------------------|----------------------|-----------------|----------------------------|-----------|-----------|-----------|---------|---------|---------|---------|---------------------------|
| MLG622 | 1 | HUN021                         | HUN (1)              | Leaf (1)        | Rts (1)                    | 127:130   | 132:132   | 195:195   | 145:145 | 202:208 | 245:251 | 219:222 | Admixed                   |
| MLG623 | 1 | HUN022                         | HUN (1)              | Leaf (1)        | Rts (1)                    | 130:130   | 129:132   | 195:195   | 145:147 | 202:202 | 251:251 | 222:222 | Eu2                       |
| MLG624 | 1 | HUN024                         | HUN (1)              | Leaf (1)        | Rts (1)                    | 127:130   | 129:132   | 195:195   | 143:145 | 205:205 | 245:251 | 210:210 | Eu1                       |
| MLG625 | 1 | HUN025                         | HUN (1)              | Root (1)        | Rts (1)                    | 127:130   | 129:135   | 195:195   | 145:147 | 196:202 | 251:251 | 219:222 | Admixed                   |
| MLG626 | 1 | HUN026                         | HUN (1)              | Root (1)        | Rts (1)                    | 130:130   | 129:132   | 195:198   | 145:147 | 202:208 | 245:245 | 216:222 | Eu2                       |
| MLG627 | 1 | HUN027                         | HUN (1)              | Root (1)        | Rts (1)                    | 124:130   | 132:132   | 195:195   | 145:145 | 196:208 | 251:251 | 219:222 | Admixed                   |
| MLG628 | 1 | HUN028                         | HUN (1)              | Leaf (1)        | Rts (1)                    | 124:127   | 132:132   | 204:213   | 143:147 | 202:205 | 251:251 | 210:216 | Eu1                       |
| MLG629 | 1 | HUN029                         | HUN (1)              | Leaf (1)        | Rts (1)                    | 115:130   | 129:132   | 195:195   | 145:145 | 202:202 | 251:251 | 222:222 | Eu2                       |
| MLG630 | 1 | HUN030                         | HUN (1)              | Leaf (1)        | Rts (1)                    | 130:130   | 129:132   | 195:198   | 143:143 | 202:208 | 251:251 | 216:219 | Eu2                       |
| MLG631 | 1 | HUN031                         | HUN (1)              | Leaf (1)        | Rts (1)                    | 124:130   | 129:132   | 195:198   | 145:147 | 205:205 | 251:251 | 219:228 | Admixed                   |
| MLG632 | 1 | HUN032                         | HUN (1)              | Leaf (1)        | Rts (1)                    | 130:130   | 129:129   | 195:195   | 145:145 | 202:205 | 251:253 | 219:222 | Eu2                       |
| MLG633 | 1 | HUN033                         | HUN (1)              | Root (1)        | Rts (1)                    | 124:127   | 129:132   | 195:195   | 143:143 | 205:208 | 245:251 | 213:219 | Admixed                   |
| MLG634 | 1 | HUN034                         | HUN (1)              | Root (1)        | Rts (1)                    | 124:124   | 129:141   | 195:195   | 145:145 | 202:208 | 251:251 | 219:219 | Admixed                   |
| MLG635 | 1 | HUN035                         | HUN (1)              | Leaf (1)        | Rts (1)                    | 130:130   | 129:129   | 195:204   | 145:145 | 205:205 | 251:253 | 213:216 | Admixed                   |
| MLG636 | 1 | HUN036                         | HUN (1)              | Leaf (1)        | Rts (1)                    | 127:130   | 132:132   | 195:198   | 143:145 | 205:208 | 241:251 | 210:216 | Admixed                   |
| MLG637 | 1 | HUN037                         | HUN (1)              | Leaf (1)        | Rts (1)                    | 127:130   | 132:132   | 195:198   | 143:145 | 205:208 | 251:251 | 213:216 | Admixed                   |
| MLG638 | 1 | HUN038                         | HUN (1)              | Leaf (1)        | Rts (1)                    | 127:130   | 129:132   | 195:195   | 143:143 | 202:208 | 245:251 | 216:216 | Admixed                   |
| MLG639 | 1 | HUN039                         | HUN (1)              | Leaf (1)        | Rts (1)                    | 130:130   | 129:132   | 195:195   | 143:145 | 202:208 | 241:251 | 210:219 | Admixed                   |
| MLG640 | 1 | HUN040                         | HUN (1)              | Leaf (1)        | Rts (1)                    | 130:130   | 129:129   | 195:195   | 143:145 | 202:208 | 241:241 | 210:219 | Admixed                   |
| MLG641 | 1 | HUN041                         | HUN (1)              | Root (1)        | Rts (1)                    | 130:130   | 132:132   | 195:204   | 145:145 | 208:208 | 245:251 | 210:222 | Admixed                   |
| MLG642 | 1 | HUN042                         | HUN (1)              | Root (1)        | Rts (1)                    | 130:130   | 129:135   | 204:204   | 145:145 | 208:208 | 245:251 | 216:222 | Eu2                       |
| MLG643 | 1 | HUN043                         | HUN (1)              | Root (1)        | Rts (1)                    | 127:130   | 129:135   | 195:195   | 145:147 | 202:202 | 245:251 | 210:222 | Eu2                       |
| MLG644 | 1 | HUN044                         | HUN (1)              | Root (1)        | Rts (1)                    | 124:130   | 132:135   | 195:198   | 143:145 | 205:208 | 245:251 | 210:216 | Admixed                   |
| MLG645 | 1 | HUN045                         | HUN (1)              | Root (1)        | Rts (1)                    | 130:130   | 132:132   | 195:204   | 145:145 | 202:208 | 251:251 | 210:222 | Admixed                   |
| MLG646 | 1 | HUN046                         | HUN (1)              | Leaf (1)        | Rts (1)                    | 130:130   | 129:132   | 195:195   | 145:145 | 205:208 | 251:251 | 216:222 | Admixed                   |
| MLG647 | 1 | HUN047                         | HUN (1)              | Leaf (1)        | Rts (1)                    | 130:130   | 129:132   | 195:195   | 145:145 | 208:208 | 251:251 | 216:222 | Eu2                       |

| MLG    | N | Sample(s)<br>Code <sup>1</sup> | Country <sup>2</sup> | Feeding<br>form | Host<br>plant <sup>3</sup> | PhyIII_55 | PhyIII_30 | PhyIII_36 | DV8     | Dvit6   | DVSSR4  | DV4     | Genetic<br>group<br>(K=2) |
|--------|---|--------------------------------|----------------------|-----------------|----------------------------|-----------|-----------|-----------|---------|---------|---------|---------|---------------------------|
| MLG648 | 1 | HUN048                         | HUN (1)              | Root (1)        | Rts (1)                    | 127:130   | 129:129   | 195:195   | 143:145 | 202:202 | 251:251 | 210:210 | Admixed                   |
| MLG649 | 1 | HUN049                         | HUN (1)              | Root (1)        | Rts (1)                    | 130:130   | 129:135   | 195:207   | 145:147 | 202:202 | 251:251 | 210:210 | Admixed                   |
| MLG650 | 1 | HUN050                         | HUN (1)              | Leaf (1)        | Rts (1)                    | 130:103   | 129:135   | 195:207   | 145:147 | 202:202 | 251:251 | 210:210 | Admixed                   |
| MLG651 | 1 | HUN051                         | HUN (1)              | Leaf (1)        | Rts (1)                    | 124:130   | 129:132   | 195:204   | 143:143 | 202:202 | 245:251 | 216:222 | Admixed                   |
| MLG652 | 1 | HUN052                         | HUN (1)              | Leaf (1)        | Rts (1)                    | 130:130   | 132:132   | 195:195   | 145:147 | 202:202 | 245:251 | 210:222 | Admixed                   |
| MLG653 | 1 | HUN053                         | HUN (1)              | Leaf (1)        | Rts (1)                    | 124:130   | 132:132   | 195:195   | 145:145 | 202:208 | 251:251 | 222:222 | Admixed                   |
| MLG654 | 1 | HUN054                         | HUN (1)              | Leaf (1)        | Rts (1)                    | 124:130   | 132:132   | 195:195   | 145:145 | 202:208 | 245:251 | 222:222 | Admixed                   |
| MLG655 | 1 | HUN055                         | HUN (1)              | Leaf (1)        | Rts (1)                    | 130:130   | 132:132   | 204:204   | 143:143 | 208:208 | 241:241 | 210:210 | Eu1                       |
| MLG656 | 1 | HUN056                         | HUN (1)              | Leaf (1)        | Rts (1)                    | 130:130   | 132:132   | 195:195   | 143:145 | 202:208 | 251:251 | 216:219 | Admixed                   |
| MLG657 | 1 | HUN057                         | HUN (1)              | Leaf (1)        | Rts (1)                    | 124:130   | 129:132   | 195:204   | 143:145 | 202:208 | 241:251 | 216:225 | Admixed                   |
| MLG658 | 1 | HUN058                         | HUN (1)              | Leaf (1)        | Rts (1)                    | 127:130   | 132:132   | 195:204   | 145:147 | 202:208 | 251:251 | 219:228 | Admixed                   |
| MLG659 | 1 | HUN059                         | HUN (1)              | Root (1)        | Rts (1)                    | 124:124   | 132:132   | 195:204   | 145:145 | 202:208 | 251:251 | 219:222 | Admixed                   |
| MLG660 | 1 | HUN060                         | HUN (1)              | Root (1)        | Rts (1)                    | 121:130   | 132:132   | 195:204   | 145:145 | 202:202 | 251:251 | 222:222 | Admixed                   |
| MLG661 | 1 | HUN061                         | HUN (1)              | Root (1)        | Rts (1)                    | 124:130   | 132:132   | 195:195   | 145:145 | 202:205 | 251:253 | 216:222 | Admixed                   |
| MLG662 | 1 | HUN062                         | HUN (1)              | Root (1)        | Rts (1)                    | 124:133   | 132:132   | 195:195   | 143:147 | 208:208 | 249:251 | 210:210 | Admixed                   |
| MLG663 | 1 | HUN063                         | HUN (1)              | Root (1)        | Rts (1)                    | 127:130   | 129:132   | 195:195   | 145:145 | 202:205 | 251:251 | 216:216 | Admixed                   |
| MLG664 | 1 | HUN064                         | HUN (1)              | Leaf (1)        | Rts (1)                    | 124:130   | 129:132   | 195:204   | 145:145 | 202:205 | 251:251 | 216:228 | Admixed                   |
| MLG665 | 1 | HUN065                         | HUN (1)              | Root (1)        | Rts (1)                    | 127:130   | 129:132   | 195:195   | 145:147 | 208:208 | 251:251 | 210:225 | Admixed                   |
| MLG666 | 1 | HUN066                         | HUN (1)              | Root (1)        | Rts (1)                    | 127:127   | 132:135   | 195:195   | 143:145 | 202:202 | 251:253 | 213:219 | Admixed                   |
| MLG667 | 1 | HUN067                         | HUN (1)              | Root (1)        | Rts (1)                    | 124:127   | 132:132   | 195:195   | 143:145 | 202:208 | 253:253 | 222:228 | Admixed                   |
| MLG668 | 1 | HUN068                         | HUN (1)              | Root (1)        | Rts (1)                    | 124:130   | 132:132   | 195:195   | 143:143 | 202:208 | 251:251 | 216:222 | Admixed                   |
| MLG669 | 1 | HUN069                         | HUN (1)              | Root (1)        | Rts (1)                    | 127:127   | 126:132   | 195:222   | 145:145 | 202:205 | 253:253 | 222:222 | Eu1                       |
| MLG670 | 1 | HUN070                         | HUN (1)              | Leaf (1)        | Rts (1)                    | 118:127   | 132:132   | 195:195   | 145:145 | 202:202 | 251:253 | 219:222 | Admixed                   |
| MLG671 | 1 | HUN071                         | HUN (1)              | Leaf (1)        | Rts (1)                    | 127:130   | 132:132   | 195:195   | 143:145 | 202:202 | 253:253 | 222:222 | Admixed                   |
| MLG672 | 1 | HUN072                         | HUN (1)              | Leaf (1)        | Rts (1)                    | 130:130   | 132:132   | 195:195   | 143:145 | 202:202 | 253:253 | 222:222 | Admixed                   |
| MLG673 | 1 | HUN073                         | HUN (1)              | Leaf (1)        | Rts (1)                    | 124:130   | 132:132   | 195:195   | 143:145 | 208:208 | 241:251 | 213:219 | Admixed                   |

| MLG    | N | Sample(s)<br>Code <sup>1</sup> | Country <sup>2</sup> | Feeding<br>form | Host<br>plant <sup>3</sup> | PhyIII_55 | PhyIII_30 | PhyIII_36 | DV8     | Dvit6   | DVSSR4  | DV4     | Genetic<br>group<br>(K=2) |
|--------|---|--------------------------------|----------------------|-----------------|----------------------------|-----------|-----------|-----------|---------|---------|---------|---------|---------------------------|
| MLG674 | 1 | HUN074                         | HUN (1)              | Leaf (1)        | Rts (1)                    | 124:130   | 132:132   | 195:195   | 143:147 | 202:202 | 251:251 | 216:222 | Admixed                   |
| MLG675 | 1 | HUN075                         | HUN (1)              | Leaf (1)        | Rts (1)                    | 124:127   | 132:132   | 195:222   | 143:145 | 202:208 | 251:251 | 219:222 | Admixed                   |
| MLG676 | 1 | HUN076                         | HUN (1)              | Leaf (1)        | Rts (1)                    | 130:130   | 132:132   | 195:204   | 143:145 | 205:205 | 251:253 | 210:222 | Eu1                       |
| MLG677 | 1 | HUN077                         | HUN (1)              | Leaf (1)        | Rts (1)                    | 124:130   | 132:132   | 195:195   | 145:145 | 202:205 | 251:251 | 210:216 | Admixed                   |
| MLG678 | 1 | HUN078                         | HUN (1)              | Root (1)        | Rts (1)                    | 124:127   | 132:132   | 195:195   | 145:147 | 208:208 | 251:253 | 222:222 | Admixed                   |
| MLG679 | 1 | HUN079                         | HUN (1)              | Root (1)        | Rts (1)                    | 121:124   | 132:132   | 195:195   | 143:145 | 202:208 | 253:253 | 219:222 | Admixed                   |
| MLG680 | 1 | HUN080                         | HUN (1)              | Root (1)        | Rts (1)                    | 124:127   | 132:132   | 195:195   | 145:147 | 202:208 | 251:253 | 222:222 | Admixed                   |
| MLG681 | 1 | HUN081                         | HUN (1)              | Leaf (1)        | Rts (1)                    | 127:127   | 132:132   | 195:222   | 145:145 | 202:205 | 253:253 | 222:222 | Eu1                       |
| MLG682 | 1 | HUN082                         | HUN (1)              | Root (1)        | Rts (1)                    | 124:127   | 123:132   | 195:222   | 143:145 | 202:208 | 251:253 | 219:222 | Admixed                   |
| MLG683 | 1 | HUN083                         | HUN (1)              | Root (1)        | Rts (1)                    | 130:130   | 129:135   | 195:195   | 145:147 | 202:208 | 251:253 | 219:228 | Eu2                       |
| MLG684 | 1 | HUN084                         | HUN (1)              | Root (1)        | Rts (1)                    | 124:124   | 132:141   | 195:210   | 143:145 | 205:208 | 251:251 | 219:219 | Admixed                   |
| MLG685 | 1 | HUN085                         | HUN (1)              | Root (1)        | Rts (1)                    | 127:127   | 129:132   | 195:195   | 143:145 | 202:205 | 251:253 | 210:210 | Eu1                       |
| MLG686 | 1 | HUN086                         | HUN (1)              | Root (1)        | Rts (1)                    | 127:127   | 132:132   | 195:195   | 143:145 | 196:202 | 251:251 | 210:216 | Eu1                       |
| MLG687 | 1 | HUN087                         | HUN (1)              | Root (1)        | Rts (1)                    | 124:127   | 132:132   | 195:195   | 143:145 | 196:202 | 251:253 | 216:225 | Eu1                       |
| MLG688 | 1 | HUN088                         | HUN (1)              | Root (1)        | Rts (1)                    | 124:127   | 132:132   | 195:195   | 143:145 | 196:202 | 251:251 | 210:210 | Eu1                       |
| MLG689 | 1 | HUN089                         | HUN (1)              | Root (1)        | Rts (1)                    | 130:130   | 132:132   | 195:195   | 143:147 | 202:208 | 251:251 | 216:219 | Eu2                       |
| MLG690 | 1 | HUN090                         | HUN (1)              | Root (1)        | Rts (1)                    | 121:124   | 132:135   | 195:195   | 143:143 | 202:208 | 245:251 | 216:216 | Eu2                       |
| MLG691 | 1 | HUN091                         | HUN (1)              | Root (1)        | Rts (1)                    | 121:130   | 132:135   | 195:204   | 143:143 | 202:208 | 245:251 | 216:216 | Eu2                       |
| MLG692 | 1 | HUN092                         | HUN (1)              | Root (1)        | Rts (1)                    | 130:133   | 129:135   | 195:195   | 143:143 | 202:208 | 251:251 | 219:219 | Eu2                       |
| MLG693 | 1 | HUN093                         | HUN (1)              | Root (1)        | Rts (1)                    | 127:130   | 132:132   | 195:195   | 143:145 | 208:208 | 251:251 | 219:222 | Admixed                   |
| MLG694 | 1 | HUN094                         | HUN (1)              | Root (1)        | Rts (1)                    | 124:133   | 129:132   | 195:195   | 145:145 | 202:208 | 251:253 | 219:219 | Eu2                       |
| MLG695 | 1 | HUN095                         | HUN (1)              | Root (1)        | Rts (1)                    | 124:127   | 132:132   | 195:195   | 143:147 | 208:208 | 241:251 | 219:219 | Admixed                   |
| MLG696 | 1 | HUN096                         | HUN (1)              | Root (1)        | Rts (1)                    | 127:127   | 132:141   | 195:195   | 143:143 | 205:205 | 245:251 | 210:228 | Admixed                   |
| MLG697 | 1 | HUN097                         | HUN (1)              | Root (1)        | Rts (1)                    | 127:127   | 132:141   | 195:195   | 143:143 | 205:205 | 245:251 | 210:210 | Eu1                       |
| MLG698 | 1 | HUN098                         | HUN (1)              | Root (1)        | Rts (1)                    | 127:127   | 132:141   | 195:195   | 143:143 | 205:205 | 245:251 | 225:228 | Admixed                   |
| MLG699 | 1 | HUN099                         | HUN (1)              | Root (1)        | Rts (1)                    | 127:130   | 132:132   | 195:204   | 143:147 | 202:202 | 251:251 | 222:222 | Admixed                   |



| MLG    | N | Sample(s)<br>Code <sup>1</sup>          | Country <sup>2</sup> | Feeding<br>form | Host<br>plant <sup>3</sup> | PhyIII_55 | PhyIII_30 | PhyIII_36 | DV8     | Dvit6   | DVSSR4  | DV4     | Genetic<br>group<br>(K=2) |
|--------|---|-----------------------------------------|----------------------|-----------------|----------------------------|-----------|-----------|-----------|---------|---------|---------|---------|---------------------------|
| MLG700 | 1 | HUN100                                  | HUN (1)              | Root (1)        | Rts (1)                    | 127:130   | 132:132   | 195:204   | 143:147 | 202:202 | 251:251 | 219:222 | Admixed                   |
| MLG701 | 1 | HUN101                                  | HUN (1)              | Root (1)        | Rts (1)                    | 130:130   | 132:132   | 195:204   | 143:145 | 202:208 | 251:253 | 210:222 | Admixed                   |
| MLG702 | 1 | HUN102                                  | HUN (1)              | Leaf (1)        | Rts (1)                    | 127:127   | 132:132   | 195:222   | 145:145 | 202:202 | 253:253 | 222:222 | Eu1                       |
| MLG703 | 1 | HRV001                                  | HRV (1)              | Leaf (1)        | n.a. (1)                   | 127:130   | 132:132   | 195:207   | 143:147 | 202:208 | 251:251 | 210:222 | Admixed                   |
| MLG704 | 1 | HRV002                                  | HRV (1)              | Leaf (1)        | n.a. (1)                   | 124:130   | 129:132   | 195:195   | 145:145 | 208:208 | 251:253 | 216:216 | Eu2                       |
| MLG705 | 1 | HRV003                                  | HRV (1)              | Leaf (1)        | n.a. (1)                   | 127:130   | 129:135   | 195:204   | 143:143 | 202:202 | 251:251 | 216:219 | Eu2                       |
| MLG706 | 1 | HRV004                                  | HRV (1)              | Leaf (1)        | n.a. (1)                   | 124:130   | 129:132   | 195:195   | 145:145 | 208:208 | 251:253 | 216:228 | Eu2                       |
| MLG707 | 1 | HRV005                                  | HRV (1)              | Leaf (1)        | n.a. (1)                   | 124:127   | 132:132   | 195:204   | 145:145 | 202:202 | 251:251 | 222:222 | Admixed                   |
| MLG708 | 1 | HRV006                                  | HRV (1)              | Leaf (1)        | n.a. (1)                   | 127:130   | 132:132   | 195:204   | 145:145 | 202:205 | 251:251 | 216:219 | Admixed                   |
| MLG709 | 2 | HRV007,<br>HRV009                       | HRV (2)              | Leaf (2)        | n.a. (2)                   | 124:130   | 132:135   | 195:195   | 143:143 | 208:208 | 241:253 | 216:222 | Admixed                   |
| MLG710 | 1 | HRV008                                  | HRV (1)              | Leaf (1)        | n.a. (1)                   | 124:130   | 132:135   | 195:195   | 143:147 | 208:208 | 245:251 | 210:222 | Admixed                   |
| MLG711 | 1 | HRV010                                  | HRV (1)              | Leaf (1)        | Vvin (1)                   | 121:130   | 129:129   | 195:195   | 143:143 | 202:202 | 241:251 | 219:222 | Eu2                       |
| MLG712 | 1 | HRV011                                  | HRV (1)              | Leaf (1)        | Vvin (1)                   | 115:127   | 129:129   | 195:204   | 143:143 | 208:208 | 245:251 | 219:222 | Eu2                       |
| MLG713 | 1 | HRV012                                  | HRV (1)              | Leaf (1)        | Vvin (1)                   | 115:127   | 132:132   | 195:195   | 145:145 | 205:208 | 251:253 | 216:216 | Admixed                   |
| MLG714 | 3 | HRV013,<br>HRV015,<br>HRV016            | HRV (3)              | Leaf (3)        | Rts (2),<br>Vvin (1)       | 130:130   | 132:135   | 195:204   | 143:145 | 202:202 | 245:251 | 222:222 | Admixed                   |
| MLG715 | 1 | HRV014                                  | HRV (1)              | Leaf (1)        | Rts (1)                    | 130:130   | 132:135   | 195:204   | 143:143 | 202:202 | 245:245 | 222:222 | Admixed                   |
| MLG716 | 2 | HRV017,<br>HRV018                       | HRV (2)              | Leaf (2)        | Rts (2)                    | 124:127   | 132:132   | 195:204   | 145:145 | 202:208 | 245:249 | 210:222 | Eu1                       |
| MLG717 | 4 | HRV019,<br>HRV020,<br>HRV021,<br>HRV022 | HRV (4)              | Leaf (4)        | Rts (4)                    | 115:130   | 132:132   | 195:195   | 143:145 | 202:202 | 251:251 | 216:216 | Eu2                       |
| MLG718 | 1 | HRV023                                  | HRV (1)              | Leaf (1)        | Rts (1)                    | 130:130   | 129:132   | 195:195   | 143:145 | 202:205 | 245:255 | 222:228 | Admixed                   |
| MLG719 | 1 | HRV026                                  | HRV (1)              | Leaf (1)        | Rts (1)                    | 124:127   | 132:132   | 195:204   | 145:147 | 202:208 | 251:253 | 219:219 | Admixed                   |
| MLG720 | 1 | HRV034                                  | HRV (1)              | Leaf (1)        | Rts (1)                    | 124:127   | 132:132   | 195:207   | 145:147 | 202:208 | 251:253 | 219:222 | Admixed                   |
| MLG721 | 4 | HRV037,<br>HRV038,                      | HRV (4)              | Leaf (4)        | Rts (4)                    | 115:124   | 129:132   | 195:204   | 143:143 | 202:202 | 251:255 | 222:222 | Eu2                       |

| MLG    | N | Sample(s)<br>Code <sup>1</sup>          | Country <sup>2</sup> | Feeding<br>form | Host<br>plant <sup>3</sup> | PhyIII_55 | PhyIII_30 | PhyIII_36 | DV8     | Dvit6   | DVSSR4  | DV4     | Genetic<br>group<br>(K=2) |
|--------|---|-----------------------------------------|----------------------|-----------------|----------------------------|-----------|-----------|-----------|---------|---------|---------|---------|---------------------------|
|        |   | HRV039,<br>HRV040                       |                      |                 |                            |           |           |           |         |         |         |         |                           |
| MLG722 | 2 | HRV041,<br>HRV042                       | HRV (2)              | Leaf (2)        | Rts (2)                    | 124:127   | 132:135   | 204:204   | 145:147 | 208:208 | 251:251 | 222:222 | Admixed                   |
| MLG723 | 1 | HRV043                                  | HRV (1)              | Leaf (1)        | Rts (1)                    | 115:127   | 129:132   | 195:204   | 145:147 | 202:208 | 251:251 | 222:222 | Eu2                       |
| MLG724 | 1 | HRV045                                  | HRV (1)              | Leaf (1)        | Rts (1)                    | 124:127   | 132:135   | 204:204   | 145:147 | 208:208 | 255:255 | 222:222 | Eu2                       |
| MLG725 | 1 | HRV046                                  | HRV (1)              | Leaf (1)        | Rts (1)                    | 124:127   | 132:135   | 204:204   | 145:147 | 208:208 | 245:251 | 222:222 | Admixed                   |
| MLG726 | 4 | HRV047,<br>HRV048,<br>HRV049,<br>HRV050 | HRV (4)              | Leaf (4)        | Rts (4)                    | 127:130   | 132:132   | 195:195   | 145:145 | 205:205 | 251:253 | 222:222 | Eu1                       |
| MLG727 | 1 | HRV051                                  | HRV (1)              | Leaf (1)        | Rts (1)                    | 127:130   | 132:132   | 195:195   | 145:145 | 205:205 | 251:251 | 222:222 | Admixed                   |
| MLG728 | 1 | HRV052                                  | HRV (1)              | Leaf (1)        | Vvin (1)                   | 124:124   | 132:141   | 204:204   | 147:147 | 196:196 | 243:243 | 222:222 | Eu1                       |
| MLG729 | 1 | HRV053                                  | HRV (1)              | Leaf (1)        | Rts (1)                    | 121:127   | 132:132   | 195:207   | 143:143 | 205:208 | 241:251 | 216:222 | Eu1                       |
| MLG730 | 2 | HRV054,<br>HRV095                       | HRV (2)              | Leaf (2)        | Rts (1),<br>Vvin (1)       | 127:130   | 129:132   | 195:195   | 143:145 | 202:208 | 245:251 | 216:219 | Admixed                   |
| MLG731 | 4 | HRV055,<br>HRV056,<br>HRV057,<br>HRV060 | HRV (4)              | Leaf (4)        | Rts (4)                    | 130:130   | 129:132   | 195:204   | 143:143 | 202:208 | 249:249 | 216:216 | Admixed                   |
| MLG732 | 2 | HRV058,<br>HRV059                       | HRV (2)              | Leaf (2)        | Rts (2)                    | 130:133   | 129:132   | 195:204   | 143:143 | 202:208 | 251:251 | 219:219 | Eu2                       |
| MLG733 | 1 | HRV061                                  | HRV (1)              | Leaf (1)        | Rts (1)                    | 127:130   | 132:132   | 195:195   | 145:147 | 202:208 | 251:251 | 213:213 | Admixed                   |
| MLG734 | 1 | HRV062                                  | HRV (1)              | Leaf (1)        | Rts (1)                    | 124:127   | 132:132   | 195:198   | 145:145 | 196:205 | 249:249 | 216:219 | Eu1                       |
| MLG735 | 1 | HRV063                                  | HRV (1)              | Leaf (1)        | Rts (1)                    | 121:127   | 132:132   | 198:204   | 143:145 | 205:205 | 251:253 | 219:219 | Admixed                   |
| MLG736 | 1 | HRV064                                  | HRV (1)              | Leaf (1)        | Rts (1)                    | 121:124   | 132:132   | 195:195   | 143:145 | 202:202 | 241:251 | 219:219 | Admixed                   |
| MLG737 | 1 | HRV065                                  | HRV (1)              | Leaf (1)        | Rts (1)                    | 124:127   | 132:132   | 195:195   | 145:145 | 205:205 | 249:249 | 222:222 | Eu1                       |
| MLG738 | 1 | HRV066                                  | HRV (1)              | Leaf (1)        | Rts (1)                    | 130:130   | 132:132   | 195:204   | 145:145 | 205:208 | 251:251 | 219:219 | Admixed                   |
| MLG739 | 1 | HRV067                                  | HRV (1)              | Leaf (1)        | Rts (1)                    | 130:130   | 132:132   | 195:204   | 145:145 | 205:208 | 241:249 | 210:219 | Eu1                       |
| MLG740 | 1 | HRV068                                  | HRV (1)              | Leaf (1)        | Rts (1)                    | 130:130   | 132:132   | 195:195   | 143:145 | 205:205 | 249:251 | 210:210 | Eu1                       |

| MLG    | N | Sample(s)<br>Code <sup>1</sup> | Country <sup>2</sup> | Feeding<br>form | Host<br>plant <sup>3</sup> | PhyIII_55 | PhyIII_30 | PhyIII_36 | DV8     | Dvit6   | DVSSR4  | DV4     | Genetic<br>group<br>(K=2) |
|--------|---|--------------------------------|----------------------|-----------------|----------------------------|-----------|-----------|-----------|---------|---------|---------|---------|---------------------------|
| MLG741 | 1 | HRV069                         | HRV (1)              | Leaf (1)        | Rts (1)                    | 121:127   | 132:132   | 198:204   | 143:145 | 205:205 | 251:251 | 222:222 | Admixed                   |
| MLG742 | 1 | HRV070                         | HRV (1)              | Leaf (1)        | Rts (1)                    | 130:130   | 129:132   | 195:204   | 145:145 | 205:208 | 239:251 | 213:213 | Admixed                   |
| MLG743 | 3 | HRV071,<br>HRV072,<br>HRV073   | HRV (3)              | Leaf (3)        | Rts (3)                    | 127:127   | 132:132   | 195:204   | 143:145 | 202:208 | 241:251 | 219:219 | Admixed                   |
| MLG744 | 1 | HRV074                         | HRV (1)              | Leaf (1)        | Rts (1)                    | 127:127   | 132:132   | 195:204   | 143:145 | 202:208 | 251:251 | 219:219 | Admixed                   |
| MLG745 | 1 | HRV075                         | HRV (1)              | Leaf (1)        | Rts (1)                    | 127:127   | 132:132   | 195:204   | 145:145 | 202:208 | 251:251 | 210:210 | Eu1                       |
| MLG746 | 1 | HRV076                         | HRV (1)              | Leaf (1)        | Rts (1)                    | 127:127   | 132:132   | 195:204   | 143:145 | 202:208 | 239:249 | 216:216 | Admixed                   |
| MLG747 | 1 | HRV077                         | HRV (1)              | Leaf (1)        | Rts (1)                    | 127:127   | 132:132   | 195:204   | 143:145 | 202:202 | 239:249 | 216:216 | Admixed                   |
| MLG748 | 1 | HRV078                         | HRV (1)              | Leaf (1)        | Vvin (1)                   | 124:124   | 129:132   | 195:195   | 143:145 | 202:202 | 251:253 | 216:225 | Admixed                   |
| MLG749 | 1 | HRV079                         | HRV (1)              | Leaf (1)        | Vvin (1)                   | 124:127   | 132:132   | 195:195   | 143:145 | 202:202 | 253:253 | 216:225 | Admixed                   |
| MLG750 | 1 | HRV080                         | HRV (1)              | Leaf (1)        | Vvin (1)                   | 124:124   | 129:135   | 195:195   | 143:145 | 202:202 | 251:251 | 216:222 | Eu2                       |
| MLG751 | 1 | HRV081                         | HRV (1)              | Leaf (1)        | Vvin (1)                   | 124:124   | 129:132   | 195:195   | 143:143 | 202:202 | 253:253 | 216:225 | Admixed                   |
| MLG752 | 1 | HRV082                         | HRV (1)              | Leaf (1)        | Vvin (1)                   | 124:127   | 123:129   | 195:195   | 143:145 | 202:202 | 253:253 | 216:225 | Admixed                   |
| MLG753 | 2 | HRV083,<br>HRV084              | HRV (2)              | Leaf (2)        | Vvin (2)                   | 124:127   | 123:129   | 195:195   | 143:143 | 202:208 | 253:253 | 216:216 | Admixed                   |
| MLG754 | 1 | HRV085                         | HRV (1)              | Leaf (1)        | Vvin (1)                   | 124:130   | 132:132   | 195:195   | 143:143 | 202:202 | 253:253 | 216:225 | Admixed                   |
| MLG755 | 2 | HRV086,<br>HRV087              | HRV (2)              | Leaf (2)        | Vvin (2)                   | 124:127   | 123:129   | 195:195   | 143:145 | 202:208 | 253:253 | 216:216 | Admixed                   |
| MLG756 | 1 | HRV088                         | HRV (1)              | Leaf (1)        | Vvin (1)                   | 130:130   | 123:129   | 195:195   | 143:143 | 202:208 | 253:253 | 216:216 | Eu2                       |
| MLG757 | 1 | HRV089                         | HRV (1)              | Leaf (1)        | Vvin (1)                   | 124:130   | 123:129   | 195:195   | 143:143 | 202:208 | 253:253 | 216:216 | Admixed                   |
| MLG758 | 1 | HRV090                         | HRV (1)              | Leaf (1)        | Vvin (1)                   | 121:130   | 129:132   | 195:195   | 145:147 | 204:207 | 241:251 | 222:222 | Admixed                   |
| MLG759 | 1 | HRV091                         | HRV (1)              | Leaf (1)        | Vvin (1)                   | 124:127   | 129:129   | 195:198   | 143:143 | 202:208 | 251:251 | 219:219 | Eu2                       |
| MLG760 | 1 | HRV092                         | HRV (1)              | Leaf (1)        | Vvin (1)                   | 121:130   | 132:132   | 195:207   | 143:143 | 204:207 | 241:251 | 216:222 | Admixed                   |
| MLG761 | 1 | HRV093                         | HRV (1)              | Leaf (1)        | Vvin (1)                   | 130:130   | 129:132   | 195:195   | 143:145 | 202:202 | 253:253 | 216:225 | Admixed                   |
| MLG762 | 1 | HRV094                         | HRV (1)              | Leaf (1)        | Vvin (1)                   | 130:130   | 129:129   | 195:195   | 145:147 | 204:207 | 241:251 | 222:222 | Admixed                   |
| MLG763 | 1 | HRV096                         | HRV (1)              | Leaf (1)        | Vvin (1)                   | 124:127   | 129:129   | 195:198   | 143:143 | 202:208 | 251:251 | 210:219 | Admixed                   |
| MLG764 | 1 | HRV097                         | HRV (1)              | Leaf (1)        | Vvin (1)                   | 127:127   | 129:135   | 192:195   | 143:143 | 205:208 | 251:251 | 210:210 | Admixed                   |

| MLG    | N | Sample(s)<br>Code <sup>1</sup> | Country <sup>2</sup> | Feeding<br>form | Host<br>plant <sup>3</sup> | PhyIII_55 | PhyIII_30 | PhyIII_36 | DV8     | Dvit6   | DVSSR4  | DV4     | Genetic<br>group<br>(K=2) |
|--------|---|--------------------------------|----------------------|-----------------|----------------------------|-----------|-----------|-----------|---------|---------|---------|---------|---------------------------|
| MLG765 | 3 | HRV098,<br>HRV099,<br>HRV100   | HRV (3)              | Leaf (3)        | Vvin (3)                   | 124:124   | 129:129   | 195:195   | 143:145 | 205:208 | 251:251 | 219:225 | Admixed                   |
| MLG766 | 2 | HRV101,<br>HRV102              | HRV (2)              | Leaf (2)        | Vvin (2)                   | 127:127   | 129:129   | 195:195   | 143:145 | 205:208 | 251:251 | 219:219 | Admixed                   |
| MLG767 | 1 | HRV103                         | HRV (1)              | Leaf (1)        | Vvin (1)                   | 127:127   | 129:129   | 195:195   | 143:143 | 202:208 | 251:251 | 219:219 | Eu2                       |
| MLG768 | 1 | HRV104                         | HRV (1)              | Leaf (1)        | Vvin (1)                   | 124:124   | 123:123   | 195:195   | 143:145 | 205:208 | 251:251 | 219:225 | Admixed                   |
| MLG769 | 1 | HRV105                         | HRV (1)              | Leaf (1)        | Vvin (1)                   | 124:139   | 129:129   | 195:195   | 143:145 | 202:208 | 251:251 | 222:222 | Eu2                       |
| MLG770 | 1 | HRV106                         | HRV (1)              | Leaf (1)        | Vvin (1)                   | 127:133   | 129:135   | 195:198   | 145:145 | 202:208 | 251:253 | 219:222 | Eu2                       |
| MLG771 | 1 | HRV107                         | HRV (1)              | Leaf (1)        | Vvin (1)                   | 127:133   | 129:135   | 195:195   | 143:145 | 202:208 | 251:251 | 216:222 | Eu2                       |
| MLG772 | 1 | ROU001                         | ROU (1)              | Leaf (1)        | Rts (1)                    | 127:130   | 132:132   | 195:195   | 143:143 | 208:208 | 251:251 | 216:219 | Admixed                   |
| MLG773 | 1 | ROU002                         | ROU (1)              | Leaf (1)        | Rts (1)                    | 124:124   | 132:141   | 195:195   | 143:145 | 202:208 | 241:251 | 222:222 | Admixed                   |
| MLG774 | 1 | ROU003                         | ROU (1)              | Leaf (1)        | Rts (1)                    | 124:127   | 132:135   | 195:195   | 145:145 | 208:208 | 251:251 | 219:222 | Admixed                   |

<sup>1</sup>: See Supplementary File 3 for Sample(s) codes details

<sup>2</sup>: AUT: Austria; CHE: Switzerland; DEU: Germany; HUN: Hungary; HRV: Croatia; ITA: Italy; ROU: Romania; SRB: Serbia; URY: Uruguay; ZAF: South Africa

<sup>3</sup>: Vvin: *Vitis vinifera* L. cultivar; Rts: *Vitis* spp. interspecific rootstock; HDP: *Vitis* spp. interspecific hybrid direct-producer; RGV: *Vitis* spp. interspecific resistant grape varieties

n.a.: not available

**Supplementary Table S2.** Genetic group assignment at K=2, 3 and 5 for 302 grape phylloxera MLGs identified in Europe (143 of Eu1 and 159 of Eu2) and 319 MLGs from the native range.

| Sample name | Origin                  | Source             | Genetic group at K=2 | Genetic group at K=3 | Genetic group at K=5 |
|-------------|-------------------------|--------------------|----------------------|----------------------|----------------------|
| AR0681071   | Native range (AR)       | Lund et al. (2017) | Eu                   | Eu1'                 | Eu1'                 |
| AR0681072   | Native range (AR)       | Lund et al. (2017) | Eu                   | Eu1'                 | Eu1'                 |
| AR0681081   | Native range (AR)       | Lund et al. (2017) | Eu                   | Eu1'                 | Eu1'                 |
| AR0691092   | Native range (AR)       | Lund et al. (2017) | NR                   | NR                   | NR1                  |
| AR0691093   | Native range (AR)       | Lund et al. (2017) | NR                   | NR                   | NR1                  |
| AR0691095   | Native range (AR)       | Lund et al. (2017) | NR                   | NR                   | NR1                  |
| AR0691101   | Native range (AR)       | Lund et al. (2017) | NR                   | NR                   | NR1                  |
| AR0691102   | Native range (AR)       | Lund et al. (2017) | NR                   | NR                   | NR1                  |
| AR0691103   | Native range (AR)       | Lund et al. (2017) | NR                   | NR                   | NR1                  |
| AR0691104   | Native range (AR)       | Lund et al. (2017) | NR                   | NR                   | NR1                  |
| AR0701113   | Native range (AR)       | Lund et al. (2017) | NR                   | NR                   | NR1                  |
| AR0701121   | Native range (AR)       | Lund et al. (2017) | NR                   | admixed              | NR1                  |
| AR0701131   | Native range (AR)       | Lund et al. (2017) | NR                   | NR                   | NR1                  |
| AR0701132   | Native range (AR)       | Lund et al. (2017) | NR                   | NR                   | NR1                  |
| AR0711141   | Native range (AR)       | Lund et al. (2017) | NR                   | NR                   | NR2                  |
| ARG1111871  | Introduced region (ARG) | Lund et al. (2017) | Eu                   | Eu1'                 | admixed              |
| ARG1111881  | Introduced region (ARG) | Lund et al. (2017) | admixed              | admixed              | admixed              |
| AUS1071701  | Introduced region (AUT) | Lund et al. (2017) | Eu                   | Eu2'                 | Eu2'                 |
| AUS1071711  | Introduced region (AUT) | Lund et al. (2017) | Eu                   | Eu2'                 | Eu2'                 |
| AUS1071721  | Introduced region (AUT) | Lund et al. (2017) | Eu                   | Eu2'                 | Eu2'                 |
| AUS1071731  | Introduced region (AUT) | Lund et al. (2017) | Eu                   | admixed              | admixed              |
| AUS1071741  | Introduced region (AUT) | Lund et al. (2017) | Eu                   | Eu2'                 | Eu2'                 |
| AUS1071751  | Introduced region (AUT) | Lund et al. (2017) | Eu                   | Eu2'                 | Eu2'                 |
| AUS1071761  | Introduced region (AUT) | Lund et al. (2017) | Eu                   | admixed              | admixed              |
| AZ0861401   | Native range (AZ)       | Lund et al. (2017) | NR                   | NR                   | admixed              |

| <b>Sample name</b> | <b>Origin</b>           | <b>Source</b>      | <b>Genetic group at K=2</b> | <b>Genetic group at K=3</b> | <b>Genetic group at K=5</b> |
|--------------------|-------------------------|--------------------|-----------------------------|-----------------------------|-----------------------------|
| AZ0861402          | Native range (AZ)       | Lund et al. (2017) | admixed                     | Eu2'                        | NR3                         |
| AZ0861403          | Native range (AZ)       | Lund et al. (2017) | NR                          | NR                          | NR3                         |
| AZ0861404          | Native range (AZ)       | Lund et al. (2017) | NR                          | NR                          | NR3                         |
| AZ0861405          | Native range (AZ)       | Lund et al. (2017) | NR                          | NR                          | NR3                         |
| AZ0871412          | Native range (AZ)       | Lund et al. (2017) | admixed                     | admixed                     | NR3                         |
| AZ0871413          | Native range (AZ)       | Lund et al. (2017) | admixed                     | admixed                     | NR3                         |
| AZ0881421          | Native range (AZ)       | Lund et al. (2017) | admixed                     | admixed                     | NR3                         |
| AZ0881422          | Native range (AZ)       | Lund et al. (2017) | NR                          | NR                          | NR3                         |
| AZ0881423          | Native range (AZ)       | Lund et al. (2017) | NR                          | NR                          | NR3                         |
| AZ0881425          | Native range (AZ)       | Lund et al. (2017) | NR                          | NR                          | NR3                         |
| AZ0891432          | Native range (AZ)       | Lund et al. (2017) | NR                          | NR                          | NR3                         |
| AZ0901442          | Native range (AZ)       | Lund et al. (2017) | NR                          | NR                          | NR3                         |
| AZ0901444          | Native range (AZ)       | Lund et al. (2017) | Eu                          | Eu2'                        | NR3                         |
| AZ0901445          | Native range (AZ)       | Lund et al. (2017) | NR                          | admixed                     | NR3                         |
| AZ0911451          | Native range (AZ)       | Lund et al. (2017) | Eu                          | admixed                     | admixed                     |
| AZ0911454          | Native range (AZ)       | Lund et al. (2017) | NR                          | NR                          | NR3                         |
| AZ0911455          | Native range (AZ)       | Lund et al. (2017) | NR                          | NR                          | NR3                         |
| AZ0921461          | Native range (AZ)       | Lund et al. (2017) | NR                          | NR                          | NR3                         |
| AZ0931474          | Native range (AZ)       | Lund et al. (2017) | NR                          | NR                          | NR3                         |
| AZ0931482          | Native range (AZ)       | Lund et al. (2017) | admixed                     | admixed                     | NR3                         |
| AZ0941501          | Native range (AZ)       | Lund et al. (2017) | admixed                     | admixed                     | NR3                         |
| AZ0941504          | Native range (AZ)       | Lund et al. (2017) | NR                          | NR                          | NR3                         |
| BRA1091811         | Introduced region (BRA) | Lund et al. (2017) | Eu                          | Eu1'                        | Eu1'                        |
| BRA1091821         | Introduced region (BRA) | Lund et al. (2017) | Eu                          | admixed                     | admixed                     |
| BRA1091831         | Introduced region (BRA) | Lund et al. (2017) | Eu                          | Eu1'                        | Eu1'                        |
| CA0010011          | Introduced range (CA)   | Lund et al. (2017) | NR                          | admixed                     | admixed                     |
| CA0020021          | Introduced range (CA)   | Lund et al. (2017) | Eu                          | admixed                     | admixed                     |
| CA0030032          | Introduced range (CA)   | Lund et al. (2017) | Eu                          | admixed                     | admixed                     |

| <b>Sample name</b> | <b>Origin</b>           | <b>Source</b>      | <b>Genetic group at K=2</b> | <b>Genetic group at K=3</b> | <b>Genetic group at K=5</b> |
|--------------------|-------------------------|--------------------|-----------------------------|-----------------------------|-----------------------------|
| CA0040041          | Introduced range (CA)   | Lund et al. (2017) | Eu                          | admixed                     | admixed                     |
| CA0050051          | Introduced range (CA)   | Lund et al. (2017) | Eu                          | admixed                     | admixed                     |
| CA0060061          | Introduced range (CA)   | Lund et al. (2017) | NR                          | NR                          | admixed                     |
| FL0560861          | Native range (FL)       | Lund et al. (2017) | NR                          | NR                          | NR1                         |
| FL0560862          | Native range (FL)       | Lund et al. (2017) | NR                          | NR                          | NR1                         |
| FL0560863          | Native range (FL)       | Lund et al. (2017) | NR                          | NR                          | NR1                         |
| FL0560864          | Native range (FL)       | Lund et al. (2017) | NR                          | NR                          | admixed                     |
| FL0560865          | Native range (FL)       | Lund et al. (2017) | NR                          | NR                          | admixed                     |
| FL0570872          | Native range (FL)       | Lund et al. (2017) | NR                          | NR                          | admixed                     |
| FL0570877          | Native range (FL)       | Lund et al. (2017) | NR                          | NR                          | admixed                     |
| HUN1061631         | Introduced region (HUN) | Lund et al. (2017) | Eu                          | admixed                     | admixed                     |
| HUN1061641         | Introduced region (HUN) | Lund et al. (2017) | Eu                          | Eu2'                        | Eu2'                        |
| HUN1061661         | Introduced region (HUN) | Lund et al. (2017) | Eu                          | Eu1'                        | admixed                     |
| HUN1061671         | Introduced region (HUN) | Lund et al. (2017) | admixed                     | admixed                     | admixed                     |
| HUN1061681         | Introduced region (HUN) | Lund et al. (2017) | Eu                          | admixed                     | admixed                     |
| HUN1061691         | Introduced region (HUN) | Lund et al. (2017) | Eu                          | admixed                     | admixed                     |
| IN0290371          | Native range (IN)       | Lund et al. (2017) | admixed                     | Eu1'                        | admixed                     |
| IN0290372          | Native range (IN)       | Lund et al. (2017) | NR                          | admixed                     | admixed                     |
| IN0290373          | Native range (IN)       | Lund et al. (2017) | Eu                          | Eu1'                        | Eu1'                        |
| IN0300382          | Native range (IN)       | Lund et al. (2017) | NR                          | NR                          | NR2                         |
| IN0300383          | Native range (IN)       | Lund et al. (2017) | admixed                     | admixed                     | admixed                     |
| IN0310392          | Native range (IN)       | Lund et al. (2017) | NR                          | NR                          | NR2                         |
| IN0310393          | Native range (IN)       | Lund et al. (2017) | Eu                          | admixed                     | admixed                     |
| IN0320403          | Native range (IN)       | Lund et al. (2017) | Eu                          | Eu1'                        | Eu1'                        |
| IN0330412          | Native range (IN)       | Lund et al. (2017) | Eu                          | Eu1'                        | Eu1'                        |
| IN0330413          | Native range (IN)       | Lund et al. (2017) | Eu                          | Eu1'                        | Eu1'                        |
| MA0070071          | Native range (MA)       | Lund et al. (2017) | admixed                     | admixed                     | admixed                     |
| MA0080091          | Native range (MA)       | Lund et al. (2017) | Eu                          | Eu1'                        | Eu1'                        |

| <b>Sample name</b> | <b>Origin</b>     | <b>Source</b>      | <b>Genetic group at K=2</b> | <b>Genetic group at K=3</b> | <b>Genetic group at K=5</b> |
|--------------------|-------------------|--------------------|-----------------------------|-----------------------------|-----------------------------|
| MA0080092          | Native range (MA) | Lund et al. (2017) | Eu                          | Eu1'                        | Eu1'                        |
| MA0080093          | Native range (MA) | Lund et al. (2017) | Eu                          | Eu1'                        | Eu1'                        |
| MA0080094          | Native range (MA) | Lund et al. (2017) | Eu                          | Eu1'                        | Eu1'                        |
| MA0090101          | Native range (MA) | Lund et al. (2017) | Eu                          | Eu1'                        | Eu1'                        |
| MA0090102          | Native range (MA) | Lund et al. (2017) | Eu                          | Eu1'                        | Eu1'                        |
| MA0090105          | Native range (MA) | Lund et al. (2017) | admixed                     | Eu1'                        | admixed                     |
| MLG1               | Eu2 (AUT )        | This work          | Eu                          | Eu2'                        | Eu2'                        |
| MLG101             | Eu2 (AUT )        | This work          | Eu                          | Eu2'                        | Eu2'                        |
| MLG108             | Eu2 (AUT )        | This work          | Eu                          | Eu2'                        | Eu2'                        |
| MLG114             | Eu2 (AUT )        | This work          | Eu                          | Eu2'                        | Eu2'                        |
| MLG119             | Eu2 (AUT )        | This work          | Eu                          | Eu2'                        | Eu2'                        |
| MLG122             | Eu2 (AUT )        | This work          | Eu                          | Eu2'                        | Eu2'                        |
| MLG124             | Eu2 (AUT )        | This work          | Eu                          | Eu2'                        | Eu2'                        |
| MLG125             | Eu2 (AUT )        | This work          | Eu                          | Eu2'                        | Eu2'                        |
| MLG126             | Eu2 (AUT )        | This work          | Eu                          | Eu2'                        | Eu2'                        |
| MLG127             | Eu2 (AUT )        | This work          | Eu                          | Eu2'                        | Eu2'                        |
| MLG13              | Eu2 (AUT )        | This work          | Eu                          | Eu2'                        | Eu2'                        |
| MLG130             | Eu2 (AUT )        | This work          | Eu                          | Eu2'                        | Eu2'                        |
| MLG133             | Eu2 (AUT )        | This work          | Eu                          | Eu2'                        | Eu2'                        |
| MLG134             | Eu2 (AUT )        | This work          | Eu                          | Eu2'                        | Eu2'                        |
| MLG136             | Eu2 (AUT )        | This work          | Eu                          | Eu2'                        | Eu2'                        |
| MLG138             | Eu2 (AUT )        | This work          | Eu                          | Eu2'                        | Eu2'                        |
| MLG139             | Eu2 (AUT )        | This work          | Eu                          | Eu2'                        | Eu2'                        |
| MLG141             | Eu2 (AUT )        | This work          | Eu                          | Eu2'                        | Eu2'                        |
| MLG142             | Eu2 (AUT )        | This work          | Eu                          | Eu2'                        | Eu2'                        |
| MLG144             | Eu2 (AUT )        | This work          | Eu                          | Eu2'                        | Eu2'                        |
| MLG145             | Eu2 (AUT )        | This work          | Eu                          | Eu2'                        | Eu2'                        |
| MLG146             | Eu2 (AUT )        | This work          | Eu                          | Eu2'                        | Eu2'                        |



| Sample name | Origin     | Source    | Genetic group at K=2 | Genetic group at K=3 | Genetic group at K=5 |
|-------------|------------|-----------|----------------------|----------------------|----------------------|
| MLG147      | Eu2 (AUT ) | This work | Eu                   | Eu2'                 | Eu2'                 |
| MLG149      | Eu2 (AUT ) | This work | Eu                   | Eu2'                 | Eu2'                 |
| MLG15       | Eu2 (AUT ) | This work | Eu                   | Eu2'                 | Eu2'                 |
| MLG150      | Eu2 (AUT ) | This work | Eu                   | Eu2'                 | Eu2'                 |
| MLG154      | Eu1 (AUT ) | This work | Eu                   | Eu1'                 | Eu1'                 |
| MLG158      | Eu2 (AUT ) | This work | Eu                   | Eu2'                 | Eu2'                 |
| MLG16       | Eu2 (AUT ) | This work | Eu                   | Eu2'                 | Eu2'                 |
| MLG160      | Eu2 (AUT ) | This work | Eu                   | Eu2'                 | Eu2'                 |
| MLG161      | Eu2 (AUT ) | This work | Eu                   | Eu2'                 | Eu2'                 |
| MLG163      | Eu2 (AUT ) | This work | Eu                   | Eu2'                 | Eu2'                 |
| MLG166      | Eu2 (AUT ) | This work | Eu                   | Eu2'                 | Eu2'                 |
| MLG17       | Eu2 (AUT ) | This work | Eu                   | admixed              | admixed              |
| MLG170      | Eu2 (AUT ) | This work | Eu                   | Eu2'                 | Eu2'                 |
| MLG171      | Eu2 (AUT ) | This work | Eu                   | Eu2'                 | Eu2'                 |
| MLG172      | Eu2 (AUT ) | This work | Eu                   | Eu2'                 | Eu2'                 |
| MLG173      | Eu2 (AUT ) | This work | Eu                   | Eu2'                 | Eu2'                 |
| MLG174      | Eu2 (AUT ) | This work | Eu                   | Eu2'                 | Eu2'                 |
| MLG175      | Eu2 (AUT ) | This work | Eu                   | Eu2'                 | Eu2'                 |
| MLG176      | Eu2 (AUT ) | This work | Eu                   | Eu2'                 | Eu2'                 |
| MLG177      | Eu2 (AUT ) | This work | Eu                   | Eu2'                 | Eu2'                 |
| MLG178      | Eu2 (AUT ) | This work | Eu                   | Eu2'                 | Eu2'                 |
| MLG179      | Eu2 (AUT ) | This work | Eu                   | Eu2'                 | Eu2'                 |
| MLG18       | Eu2 (AUT ) | This work | Eu                   | Eu2'                 | Eu2'                 |
| MLG180      | Eu2 (AUT ) | This work | Eu                   | Eu2'                 | Eu2'                 |
| MLG183      | Eu1 (AUT ) | This work | Eu                   | admixed              | admixed              |
| MLG185      | Eu1 (AUT ) | This work | Eu                   | admixed              | admixed              |
| MLG187      | Eu2 (AUT ) | This work | Eu                   | Eu2'                 | Eu2'                 |
| MLG188      | Eu2 (AUT ) | This work | Eu                   | Eu2'                 | Eu2'                 |

| Sample name | Origin     | Source    | Genetic group at K=2 | Genetic group at K=3 | Genetic group at K=5 |
|-------------|------------|-----------|----------------------|----------------------|----------------------|
| MLG189      | Eu2 (AUT ) | This work | Eu                   | Eu2'                 | Eu2'                 |
| MLG19       | Eu2 (AUT ) | This work | Eu                   | Eu2'                 | Eu2'                 |
| MLG190      | Eu2 (AUT ) | This work | Eu                   | Eu2'                 | Eu2'                 |
| MLG191      | Eu2 (AUT ) | This work | Eu                   | Eu2'                 | Eu2'                 |
| MLG192      | Eu2 (AUT ) | This work | Eu                   | Eu2'                 | Eu2'                 |
| MLG197      | Eu2 (AUT ) | This work | Eu                   | Eu2'                 | Eu2'                 |
| MLG199      | Eu2 (AUT ) | This work | Eu                   | Eu2'                 | Eu2'                 |
| MLG2        | Eu2 (AUT ) | This work | Eu                   | Eu2'                 | Eu2'                 |
| MLG202      | Eu2 (AUT ) | This work | Eu                   | Eu2'                 | Eu2'                 |
| MLG208      | Eu2 (AUT ) | This work | Eu                   | Eu2'                 | Eu2'                 |
| MLG209      | Eu2 (AUT ) | This work | Eu                   | Eu2'                 | Eu2'                 |
| MLG210      | Eu2 (AUT ) | This work | Eu                   | Eu2'                 | Eu2'                 |
| MLG214      | Eu2 (AUT ) | This work | Eu                   | Eu2'                 | Eu2'                 |
| MLG217      | Eu2 (AUT ) | This work | admixed              | admixed              | admixed              |
| MLG222      | Eu2 (AUT ) | This work | Eu                   | Eu2'                 | Eu2'                 |
| MLG224      | Eu2 (AUT ) | This work | Eu                   | Eu2'                 | Eu2'                 |
| MLG226      | Eu2 (AUT ) | This work | Eu                   | Eu2'                 | Eu2'                 |
| MLG227      | Eu1 (AUT ) | This work | Eu                   | Eu1'                 | Eu1'                 |
| MLG228      | Eu1 (AUT ) | This work | Eu                   | Eu1'                 | Eu1'                 |
| MLG229      | Eu2 (AUT ) | This work | Eu                   | Eu2'                 | Eu2'                 |
| MLG234      | Eu1 (DEU ) | This work | Eu                   | admixed              | admixed              |
| MLG239      | Eu2 (DEU ) | This work | Eu                   | Eu2'                 | Eu2'                 |
| MLG24       | Eu2 (AUT ) | This work | Eu                   | Eu2'                 | Eu2'                 |
| MLG243      | Eu1 (DEU ) | This work | Eu                   | Eu1'                 | Eu1'                 |
| MLG244      | Eu1 (DEU ) | This work | Eu                   | Eu1'                 | Eu1'                 |
| MLG246      | Eu1 (DEU ) | This work | Eu                   | Eu1'                 | Eu1'                 |
| MLG248      | Eu2 (DEU ) | This work | Eu                   | Eu2'                 | Eu2'                 |
| MLG251      | Eu2 (DEU ) | This work | Eu                   | Eu2'                 | Eu2'                 |

| Sample name | Origin     | Source    | Genetic group at K=2 | Genetic group at K=3 | Genetic group at K=5 |
|-------------|------------|-----------|----------------------|----------------------|----------------------|
| MLG253      | Eu2 (DEU ) | This work | Eu                   | Eu2'                 | Eu2'                 |
| MLG257      | Eu1 (DEU ) | This work | Eu                   | Eu1'                 | Eu1'                 |
| MLG269      | Eu1 (DEU ) | This work | NR                   | NR                   | NR1                  |
| MLG27       | Eu2 (AUT ) | This work | admixed              | admixed              | admixed              |
| MLG271      | Eu1 (DEU ) | This work | Eu                   | Eu1'                 | Eu1'                 |
| MLG272      | Eu1 (DEU ) | This work | Eu                   | Eu1'                 | Eu1'                 |
| MLG274      | Eu1 (DEU ) | This work | Eu                   | Eu1'                 | Eu1'                 |
| MLG275      | Eu1 (DEU ) | This work | Eu                   | Eu1'                 | Eu1'                 |
| MLG276      | Eu1 (DEU ) | This work | Eu                   | Eu1'                 | Eu1'                 |
| MLG277      | Eu1 (DEU ) | This work | Eu                   | Eu1'                 | Eu1'                 |
| MLG278      | Eu1 (DEU ) | This work | Eu                   | Eu1'                 | Eu1'                 |
| MLG281      | Eu1 (DEU ) | This work | Eu                   | Eu1'                 | Eu1'                 |
| MLG283      | Eu1 (DEU ) | This work | Eu                   | Eu1'                 | Eu1'                 |
| MLG284      | Eu1 (DEU ) | This work | Eu                   | Eu1'                 | Eu1'                 |
| MLG285      | Eu1 (DEU ) | This work | Eu                   | Eu1'                 | Eu1'                 |
| MLG289      | Eu1 (DEU ) | This work | Eu                   | Eu1'                 | Eu1'                 |
| MLG291      | Eu2 (DEU ) | This work | Eu                   | Eu2'                 | Eu2'                 |
| MLG292      | Eu2 (DEU ) | This work | Eu                   | admixed              | admixed              |
| MLG296      | Eu2 (DEU ) | This work | Eu                   | admixed              | admixed              |
| MLG297      | Eu1 (DEU ) | This work | Eu                   | Eu1'                 | Eu1'                 |
| MLG298      | Eu1 (DEU ) | This work | Eu                   | Eu1'                 | Eu1'                 |
| MLG299      | Eu1 (DEU ) | This work | Eu                   | Eu1'                 | Eu1'                 |
| MLG307      | Eu2 (DEU ) | This work | Eu                   | Eu2'                 | Eu2'                 |
| MLG31       | Eu2 (AUT ) | This work | Eu                   | Eu2'                 | Eu2'                 |
| MLG310      | Eu1 (CHE ) | This work | Eu                   | Eu1'                 | Eu1'                 |
| MLG316      | Eu1 (CHE ) | This work | Eu                   | Eu1'                 | Eu1'                 |
| MLG323      | Eu1 (CHE ) | This work | Eu                   | Eu1'                 | Eu1'                 |
| MLG324      | Eu1 (CHE ) | This work | Eu                   | Eu1'                 | Eu1'                 |

| Sample name | Origin     | Source    | Genetic group at K=2 | Genetic group at K=3 | Genetic group at K=5 |
|-------------|------------|-----------|----------------------|----------------------|----------------------|
| MLG327      | Eu1 (CHE ) | This work | Eu                   | admixed              | admixed              |
| MLG328      | Eu1 (CHE ) | This work | Eu                   | Eu1'                 | Eu1'                 |
| MLG33       | Eu2 (AUT ) | This work | Eu                   | Eu2'                 | Eu2'                 |
| MLG333      | Eu1 (CHE ) | This work | Eu                   | Eu1'                 | Eu1'                 |
| MLG334      | Eu1 (CHE ) | This work | Eu                   | admixed              | Eu1'                 |
| MLG335      | Eu1 (CHE ) | This work | Eu                   | Eu1'                 | Eu1'                 |
| MLG337      | Eu1 (CHE ) | This work | Eu                   | Eu1'                 | Eu1'                 |
| MLG340      | Eu1 (CHE ) | This work | Eu                   | Eu1'                 | Eu1'                 |
| MLG341      | Eu1 (CHE ) | This work | Eu                   | Eu1'                 | Eu1'                 |
| MLG35       | Eu2 (AUT ) | This work | Eu                   | Eu2'                 | Eu2'                 |
| MLG354      | Eu1 (CHE ) | This work | Eu                   | Eu1'                 | Eu1'                 |
| MLG355      | Eu1 (CHE ) | This work | Eu                   | Eu1'                 | Eu1'                 |
| MLG358      | Eu1 (CHE ) | This work | Eu                   | Eu1'                 | Eu1'                 |
| MLG36       | Eu2 (AUT ) | This work | Eu                   | Eu2'                 | Eu2'                 |
| MLG361      | Eu1 (CHE ) | This work | Eu                   | Eu1'                 | Eu1'                 |
| MLG362      | Eu1 (CHE ) | This work | Eu                   | Eu1'                 | Eu1'                 |
| MLG364      | Eu1 (CHE ) | This work | Eu                   | admixed              | admixed              |
| MLG371      | Eu1 (CHE ) | This work | Eu                   | Eu1'                 | Eu1'                 |
| MLG372      | Eu1 (CHE ) | This work | Eu                   | Eu1'                 | Eu1'                 |
| MLG373      | Eu1 (CHE ) | This work | Eu                   | Eu1'                 | Eu1'                 |
| MLG374      | Eu1 (CHE ) | This work | Eu                   | Eu1'                 | Eu1'                 |
| MLG375      | Eu1 (CHE ) | This work | Eu                   | Eu1'                 | Eu1'                 |
| MLG376      | Eu1 (CHE ) | This work | Eu                   | Eu1'                 | Eu1'                 |
| MLG38       | Eu2 (AUT ) | This work | Eu                   | Eu2'                 | Eu2'                 |
| MLG39       | Eu2 (AUT ) | This work | Eu                   | admixed              | admixed              |
| MLG397      | Eu1 (CHE ) | This work | Eu                   | admixed              | admixed              |
| MLG398      | Eu1 (CHE ) | This work | Eu                   | Eu1'                 | Eu1'                 |
| MLG403      | Eu1 (CHE ) | This work | Eu                   | Eu1'                 | Eu1'                 |

| Sample name | Origin     | Source    | Genetic group at K=2 | Genetic group at K=3 | Genetic group at K=5 |
|-------------|------------|-----------|----------------------|----------------------|----------------------|
| MLG405      | Eu1 (CHE ) | This work | Eu                   | Eu1'                 | Eu1'                 |
| MLG41       | Eu2 (AUT ) | This work | Eu                   | admixed              | admixed              |
| MLG410      | Eu1 (CHE ) | This work | Eu                   | admixed              | admixed              |
| MLG411      | Eu1 (CHE ) | This work | Eu                   | admixed              | admixed              |
| MLG412      | Eu1 (CHE ) | This work | Eu                   | Eu1'                 | Eu1'                 |
| MLG413      | Eu1 (CHE ) | This work | Eu                   | Eu1'                 | Eu1'                 |
| MLG414      | Eu1 (CHE ) | This work | Eu                   | Eu1'                 | Eu1'                 |
| MLG415      | Eu1 (CHE ) | This work | Eu                   | Eu1'                 | Eu1'                 |
| MLG416      | Eu1 (CHE ) | This work | Eu                   | Eu1'                 | Eu1'                 |
| MLG417      | Eu1 (CHE ) | This work | Eu                   | Eu1'                 | Eu1'                 |
| MLG419      | Eu1 (CHE ) | This work | Eu                   | Eu1'                 | Eu1'                 |
| MLG420      | Eu1 (CHE ) | This work | Eu                   | Eu1'                 | Eu1'                 |
| MLG422      | Eu1 (CHE ) | This work | Eu                   | Eu1'                 | Eu1'                 |
| MLG423      | Eu1 (CHE ) | This work | Eu                   | Eu1'                 | Eu1'                 |
| MLG426      | Eu1 (CHE ) | This work | Eu                   | Eu1'                 | Eu1'                 |
| MLG427      | Eu1 (CHE ) | This work | Eu                   | Eu1'                 | Eu1'                 |
| MLG430      | Eu1 (CHE ) | This work | Eu                   | Eu1'                 | Eu1'                 |
| MLG436      | Eu1 (CHE ) | This work | Eu                   | Eu1'                 | Eu1'                 |
| MLG437      | Eu1 (CHE ) | This work | Eu                   | Eu1'                 | Eu1'                 |
| MLG438      | Eu1 (CHE ) | This work | Eu                   | Eu1'                 | Eu1'                 |
| MLG440      | Eu1 (CHE ) | This work | Eu                   | Eu1'                 | Eu1'                 |
| MLG441      | Eu1 (CHE ) | This work | Eu                   | Eu1'                 | Eu1'                 |
| MLG442      | Eu1 (CHE ) | This work | Eu                   | Eu1'                 | Eu1'                 |
| MLG443      | Eu1 (CHE ) | This work | Eu                   | Eu1'                 | Eu1'                 |
| MLG444      | Eu1 (CHE ) | This work | Eu                   | Eu1'                 | Eu1'                 |
| MLG445      | Eu1 (CHE ) | This work | Eu                   | Eu1'                 | Eu1'                 |
| MLG446      | Eu1 (CHE ) | This work | Eu                   | Eu1'                 | Eu1'                 |
| MLG448      | Eu1 (CHE ) | This work | Eu                   | Eu1'                 | Eu1'                 |

| <b>Sample name</b> | <b>Origin</b> | <b>Source</b> | <b>Genetic group at K=2</b> | <b>Genetic group at K=3</b> | <b>Genetic group at K=5</b> |
|--------------------|---------------|---------------|-----------------------------|-----------------------------|-----------------------------|
| MLG449             | Eu1 (CHE )    | This work     | Eu                          | Eu1'                        | Eu1'                        |
| MLG45              | Eu2 (AUT )    | This work     | Eu                          | Eu2'                        | Eu2'                        |
| MLG451             | Eu1 (CHE )    | This work     | Eu                          | Eu1'                        | Eu1'                        |
| MLG452             | Eu1 (CHE )    | This work     | Eu                          | Eu1'                        | Eu1'                        |
| MLG453             | Eu1 (CHE )    | This work     | Eu                          | Eu1'                        | Eu1'                        |
| MLG461             | Eu2 (CHE )    | This work     | Eu                          | Eu2'                        | Eu2'                        |
| MLG466             | Eu1 (CHE )    | This work     | Eu                          | Eu1'                        | Eu1'                        |
| MLG470             | Eu2 (CHE )    | This work     | Eu                          | Eu2'                        | Eu2'                        |
| MLG472             | Eu2 (CHE )    | This work     | Eu                          | Eu2'                        | Eu2'                        |
| MLG473             | Eu2 (CHE )    | This work     | Eu                          | Eu2'                        | Eu2'                        |
| MLG477             | Eu2 (CHE )    | This work     | Eu                          | Eu2'                        | Eu2'                        |
| MLG478             | Eu2 (CHE )    | This work     | Eu                          | Eu2'                        | Eu2'                        |
| MLG480             | Eu1 (URY )    | This work     | Eu                          | Eu1'                        | Eu1'                        |
| MLG481             | Eu1 (URY )    | This work     | Eu                          | Eu1'                        | Eu1'                        |
| MLG482             | Eu1 (URY )    | This work     | Eu                          | Eu1'                        | Eu1'                        |
| MLG483             | Eu1 (URY )    | This work     | Eu                          | Eu1'                        | Eu1'                        |
| MLG484             | Eu1 (URY )    | This work     | Eu                          | Eu1'                        | Eu1'                        |
| MLG485             | Eu1 (URY )    | This work     | Eu                          | Eu1'                        | Eu1'                        |
| MLG486             | Eu1 (URY )    | This work     | Eu                          | Eu1'                        | Eu1'                        |
| MLG487             | Eu1 (URY )    | This work     | Eu                          | Eu1'                        | Eu1'                        |
| MLG488             | Eu1 (URY )    | This work     | Eu                          | Eu1'                        | Eu1'                        |
| MLG490             | Eu1 (URY )    | This work     | Eu                          | Eu1'                        | Eu1'                        |
| MLG493             | Eu1 (URY )    | This work     | Eu                          | Eu1'                        | Eu1'                        |
| MLG494             | Eu1 (URY )    | This work     | Eu                          | Eu1'                        | Eu1'                        |
| MLG495             | Eu1 (URY )    | This work     | Eu                          | Eu1'                        | Eu1'                        |
| MLG496             | Eu1 (URY )    | This work     | Eu                          | Eu1'                        | Eu1'                        |
| MLG497             | Eu1 (URY )    | This work     | Eu                          | Eu1'                        | Eu1'                        |
| MLG498             | Eu1 (URY )    | This work     | Eu                          | Eu1'                        | Eu1'                        |

| Sample name | Origin     | Source    | Genetic group at K=2 | Genetic group at K=3 | Genetic group at K=5 |
|-------------|------------|-----------|----------------------|----------------------|----------------------|
| MLG499      | Eu1 (URY ) | This work | Eu                   | Eu1'                 | Eu1'                 |
| MLG500      | Eu1 (URY ) | This work | Eu                   | Eu1'                 | Eu1'                 |
| MLG505      | Eu1 (URY ) | This work | Eu                   | Eu1'                 | Eu1'                 |
| MLG516      | Eu2 (SRB ) | This work | Eu                   | Eu2'                 | Eu2'                 |
| MLG521      | Eu2 (SRB ) | This work | Eu                   | Eu2'                 | Eu2'                 |
| MLG527      | Eu2 (SRB ) | This work | Eu                   | Eu2'                 | Eu2'                 |
| MLG528      | Eu2 (SRB ) | This work | Eu                   | Eu2'                 | Eu2'                 |
| MLG529      | Eu2 (SRB ) | This work | Eu                   | Eu2'                 | Eu2'                 |
| MLG531      | Eu2 (SRB ) | This work | Eu                   | Eu2'                 | Eu2'                 |
| MLG533      | Eu2 (SRB ) | This work | Eu                   | Eu2'                 | Eu2'                 |
| MLG536      | Eu2 (SRB ) | This work | Eu                   | Eu2'                 | Eu2'                 |
| MLG537      | Eu2 (SRB ) | This work | Eu                   | Eu2'                 | Eu2'                 |
| MLG542      | Eu1 (ITA ) | This work | Eu                   | admixed              | admixed              |
| MLG543      | Eu1 (ITA ) | This work | Eu                   | admixed              | admixed              |
| MLG545      | Eu1 (ITA ) | This work | Eu                   | Eu1'                 | Eu1'                 |
| MLG558      | Eu1 (ITA ) | This work | Eu                   | admixed              | admixed              |
| MLG56       | Eu2 (AUT ) | This work | Eu                   | Eu2'                 | Eu2'                 |
| MLG560      | Eu1 (ITA ) | This work | Eu                   | Eu1'                 | Eu1'                 |
| MLG562      | Eu1 (ITA ) | This work | Eu                   | Eu1'                 | Eu1'                 |
| MLG563      | Eu1 (ITA ) | This work | Eu                   | Eu1'                 | Eu1'                 |
| MLG566      | Eu2 (ITA ) | This work | Eu                   | Eu2'                 | Eu2'                 |
| MLG577      | Eu1 (ITA ) | This work | Eu                   | Eu1'                 | Eu1'                 |
| MLG578      | Eu2 (ITA ) | This work | Eu                   | Eu2'                 | Eu2'                 |
| MLG58       | Eu2 (AUT ) | This work | Eu                   | Eu2'                 | Eu2'                 |
| MLG580      | Eu1 (ITA ) | This work | Eu                   | Eu1'                 | Eu1'                 |
| MLG588      | Eu2 (ITA ) | This work | Eu                   | Eu2'                 | Eu2'                 |
| MLG59       | Eu2 (AUT ) | This work | Eu                   | Eu2'                 | Eu2'                 |
| MLG590      | Eu2 (ITA ) | This work | Eu                   | Eu2'                 | Eu2'                 |

| Sample name | Origin     | Source    | Genetic group at K=2 | Genetic group at K=3 | Genetic group at K=5 |
|-------------|------------|-----------|----------------------|----------------------|----------------------|
| MLG592      | Eu1 (ITA ) | This work | Eu                   | Eu1'                 | Eu1'                 |
| MLG593      | Eu1 (ITA ) | This work | Eu                   | Eu1'                 | Eu1'                 |
| MLG594      | Eu2 (ITA ) | This work | Eu                   | Eu2'                 | Eu2'                 |
| MLG595      | Eu1 (ITA ) | This work | Eu                   | Eu1'                 | Eu1'                 |
| MLG596      | Eu1 (ITA ) | This work | Eu                   | Eu1'                 | Eu1'                 |
| MLG6        | Eu1 (AUT ) | This work | Eu                   | Eu1'                 | Eu1'                 |
| MLG603      | Eu2 (HUN ) | This work | Eu                   | Eu2'                 | Eu2'                 |
| MLG606      | Eu2 (HUN ) | This work | Eu                   | Eu2'                 | Eu2'                 |
| MLG608      | Eu2 (HUN ) | This work | Eu                   | Eu2'                 | Eu2'                 |
| MLG61       | Eu2 (AUT ) | This work | Eu                   | Eu2'                 | Eu2'                 |
| MLG610      | Eu2 (HUN ) | This work | Eu                   | Eu2'                 | Eu2'                 |
| MLG611      | Eu1 (HUN ) | This work | admixed              | admixed              | admixed              |
| MLG614      | Eu1 (HUN ) | This work | Eu                   | Eu1'                 | Eu1'                 |
| MLG623      | Eu2 (HUN ) | This work | Eu                   | Eu2'                 | Eu2'                 |
| MLG624      | Eu1 (HUN ) | This work | Eu                   | admixed              | admixed              |
| MLG626      | Eu2 (HUN ) | This work | Eu                   | Eu2'                 | Eu2'                 |
| MLG628      | Eu1 (HUN ) | This work | Eu                   | Eu1'                 | Eu1'                 |
| MLG629      | Eu2 (HUN ) | This work | Eu                   | Eu2'                 | Eu2'                 |
| MLG630      | Eu2 (HUN ) | This work | Eu                   | Eu2'                 | Eu2'                 |
| MLG632      | Eu2 (HUN ) | This work | Eu                   | Eu2'                 | Eu2'                 |
| MLG64       | Eu2 (AUT ) | This work | Eu                   | Eu2'                 | Eu2'                 |
| MLG642      | Eu2 (HUN ) | This work | Eu                   | Eu2'                 | Eu2'                 |
| MLG643      | Eu2 (HUN ) | This work | Eu                   | Eu2'                 | Eu2'                 |
| MLG647      | Eu2 (HUN ) | This work | Eu                   | Eu2'                 | Eu2'                 |
| MLG655      | Eu1 (HUN ) | This work | Eu                   | Eu2'                 | Eu2'                 |
| MLG669      | Eu1 (HUN ) | This work | admixed              | admixed              | admixed              |
| MLG67       | Eu1 (AUT ) | This work | Eu                   | Eu1'                 | Eu1'                 |
| MLG676      | Eu1 (HUN ) | This work | Eu                   | Eu1'                 | Eu1'                 |



| Sample name | Origin     | Source    | Genetic group at K=2 | Genetic group at K=3 | Genetic group at K=5 |
|-------------|------------|-----------|----------------------|----------------------|----------------------|
| MLG681      | Eu1 (HUN ) | This work | Eu                   | Eu1'                 | Eu1'                 |
| MLG683      | Eu2 (HUN ) | This work | Eu                   | Eu2'                 | Eu2'                 |
| MLG685      | Eu1 (HUN ) | This work | Eu                   | admixed              | admixed              |
| MLG686      | Eu1 (HUN ) | This work | Eu                   | Eu1'                 | Eu1'                 |
| MLG687      | Eu1 (HUN ) | This work | Eu                   | Eu1'                 | Eu1'                 |
| MLG688      | Eu1 (HUN ) | This work | Eu                   | Eu1'                 | Eu1'                 |
| MLG689      | Eu2 (HUN ) | This work | Eu                   | Eu2'                 | Eu2'                 |
| MLG690      | Eu2 (HUN ) | This work | Eu                   | Eu2'                 | Eu2'                 |
| MLG691      | Eu2 (HUN ) | This work | Eu                   | Eu2'                 | Eu2'                 |
| MLG692      | Eu2 (HUN ) | This work | Eu                   | Eu2'                 | Eu2'                 |
| MLG694      | Eu2 (HUN ) | This work | Eu                   | Eu2'                 | Eu2'                 |
| MLG697      | Eu1 (HUN ) | This work | Eu                   | Eu1'                 | Eu1'                 |
| MLG702      | Eu1 (HUN ) | This work | Eu                   | Eu1'                 | Eu1'                 |
| MLG704      | Eu2 (HRV ) | This work | Eu                   | Eu2'                 | Eu2'                 |
| MLG705      | Eu2 (HRV ) | This work | Eu                   | Eu2'                 | Eu2'                 |
| MLG706      | Eu2 (HRV ) | This work | Eu                   | Eu2'                 | Eu2'                 |
| MLG711      | Eu2 (HRV ) | This work | Eu                   | Eu2'                 | Eu2'                 |
| MLG712      | Eu2 (HRV ) | This work | Eu                   | Eu2'                 | Eu2'                 |
| MLG716      | Eu1 (HRV ) | This work | Eu                   | admixed              | admixed              |
| MLG717      | Eu2 (HRV ) | This work | Eu                   | Eu2'                 | Eu2'                 |
| MLG72       | Eu2 (AUT ) | This work | Eu                   | Eu2'                 | Eu2'                 |
| MLG721      | Eu2 (HRV ) | This work | Eu                   | Eu2'                 | Eu2'                 |
| MLG723      | Eu2 (HRV ) | This work | Eu                   | Eu2'                 | Eu2'                 |
| MLG724      | Eu2 (HRV ) | This work | Eu                   | Eu2'                 | admixed              |
| MLG726      | Eu1 (HRV ) | This work | Eu                   | Eu1'                 | Eu1'                 |
| MLG728      | Eu1 (HRV ) | This work | Eu                   | Eu1'                 | Eu1'                 |
| MLG729      | Eu1 (HRV ) | This work | Eu                   | Eu1'                 | Eu1'                 |
| MLG73       | Eu2 (AUT ) | This work | Eu                   | Eu2'                 | Eu2'                 |

| Sample name | Origin     | Source    | Genetic group at K=2 | Genetic group at K=3 | Genetic group at K=5 |
|-------------|------------|-----------|----------------------|----------------------|----------------------|
| MLG732      | Eu2 (HRV ) | This work | Eu                   | Eu2'                 | Eu2'                 |
| MLG734      | Eu1 (HRV ) | This work | Eu                   | Eu1'                 | Eu1'                 |
| MLG737      | Eu1 (HRV ) | This work | Eu                   | Eu1'                 | Eu1'                 |
| MLG739      | Eu1 (HRV ) | This work | Eu                   | admixed              | admixed              |
| MLG74       | Eu2 (AUT ) | This work | Eu                   | Eu2'                 | Eu2'                 |
| MLG740      | Eu1 (HRV ) | This work | Eu                   | Eu1'                 | Eu1'                 |
| MLG745      | Eu1 (HRV ) | This work | Eu                   | admixed              | admixed              |
| MLG75       | Eu2 (AUT ) | This work | Eu                   | Eu2'                 | Eu2'                 |
| MLG750      | Eu2 (HRV ) | This work | Eu                   | Eu2'                 | Eu2'                 |
| MLG756      | Eu2 (HRV ) | This work | Eu                   | Eu2'                 | Eu2'                 |
| MLG759      | Eu2 (HRV ) | This work | Eu                   | Eu2'                 | Eu2'                 |
| MLG76       | Eu2 (AUT ) | This work | Eu                   | Eu2'                 | Eu2'                 |
| MLG767      | Eu2 (HRV ) | This work | Eu                   | Eu2'                 | Eu2'                 |
| MLG769      | Eu2 (HRV ) | This work | Eu                   | Eu2'                 | Eu2'                 |
| MLG770      | Eu2 (HRV ) | This work | Eu                   | Eu2'                 | Eu2'                 |
| MLG771      | Eu2 (HRV ) | This work | Eu                   | Eu2'                 | Eu2'                 |
| MLG81       | Eu2 (AUT ) | This work | Eu                   | Eu2'                 | Eu2'                 |
| MLG82       | Eu2 (AUT ) | This work | Eu                   | Eu2'                 | Eu2'                 |
| MLG83       | Eu2 (AUT ) | This work | Eu                   | Eu2'                 | Eu2'                 |
| MLG85       | Eu2 (AUT ) | This work | Eu                   | Eu2'                 | Eu2'                 |
| MLG86       | Eu2 (AUT ) | This work | Eu                   | Eu2'                 | Eu2'                 |
| MLG88       | Eu1 (AUT ) | This work | Eu                   | Eu1'                 | Eu1'                 |
| MLG91       | Eu2 (AUT ) | This work | Eu                   | Eu2'                 | Eu2'                 |
| MLG93       | Eu2 (AUT ) | This work | Eu                   | Eu2'                 | Eu2'                 |
| MLG94       | Eu2 (AUT ) | This work | Eu                   | Eu2'                 | Eu2'                 |
| MLG96       | Eu2 (AUT ) | This work | Eu                   | Eu2'                 | Eu2'                 |
| MLG98       | Eu2 (AUT ) | This work | Eu                   | Eu2'                 | Eu2'                 |
| MLG99       | Eu2 (AUT ) | This work | admixed              | admixed              | admixed              |

| <b>Sample name</b> | <b>Origin</b>     | <b>Source</b>      | <b>Genetic group at K=2</b> | <b>Genetic group at K=3</b> | <b>Genetic group at K=5</b> |
|--------------------|-------------------|--------------------|-----------------------------|-----------------------------|-----------------------------|
| MN0340421          | Native range (MN) | Lund et al. (2017) | admixed                     | Eu1'                        | admixed                     |
| MN0340423          | Native range (MN) | Lund et al. (2017) | NR                          | NR                          | NR1                         |
| MN0350431          | Native range (MN) | Lund et al. (2017) | Eu                          | Eu1'                        | Eu1'                        |
| MN0350433          | Native range (MN) | Lund et al. (2017) | admixed                     | Eu1'                        | admixed                     |
| MN0350442          | Native range (MN) | Lund et al. (2017) | admixed                     | Eu1'                        | admixed                     |
| MN0350443          | Native range (MN) | Lund et al. (2017) | admixed                     | admixed                     | admixed                     |
| MO0721152          | Native range (MO) | Lund et al. (2017) | NR                          | NR                          | NR1                         |
| MO0721162          | Native range (MO) | Lund et al. (2017) | NR                          | NR                          | NR1                         |
| MO0721163          | Native range (MO) | Lund et al. (2017) | NR                          | NR                          | NR1                         |
| MO0721165          | Native range (MO) | Lund et al. (2017) | NR                          | NR                          | NR1                         |
| MO0731171          | Native range (MO) | Lund et al. (2017) | NR                          | NR                          | NR1                         |
| MO0741192          | Native range (MO) | Lund et al. (2017) | NR                          | admixed                     | admixed                     |
| MO0741193          | Native range (MO) | Lund et al. (2017) | NR                          | NR                          | NR2                         |
| MO0741194          | Native range (MO) | Lund et al. (2017) | NR                          | NR                          | NR2                         |
| MO0741195          | Native range (MO) | Lund et al. (2017) | NR                          | NR                          | NR2                         |
| MO0741196          | Native range (MO) | Lund et al. (2017) | NR                          | NR                          | NR2                         |
| MO0741201          | Native range (MO) | Lund et al. (2017) | NR                          | NR                          | NR2                         |
| MO0741202          | Native range (MO) | Lund et al. (2017) | NR                          | NR                          | NR2                         |
| MO0751211          | Native range (MO) | Lund et al. (2017) | NR                          | NR                          | NR2                         |
| MO0751221          | Native range (MO) | Lund et al. (2017) | NR                          | NR                          | NR2                         |
| MO0761231          | Native range (MO) | Lund et al. (2017) | NR                          | NR                          | admixed                     |
| MO0761232          | Native range (MO) | Lund et al. (2017) | NR                          | NR                          | NR2                         |
| MO0771241          | Native range (MO) | Lund et al. (2017) | NR                          | NR                          | NR2                         |
| MO0771242          | Native range (MO) | Lund et al. (2017) | NR                          | NR                          | NR2                         |
| MO0771243          | Native range (MO) | Lund et al. (2017) | NR                          | NR                          | NR2                         |
| MO0771251          | Native range (MO) | Lund et al. (2017) | NR                          | NR                          | NR2                         |
| MO0771253          | Native range (MO) | Lund et al. (2017) | NR                          | NR                          | NR2                         |
| MO0771254          | Native range (MO) | Lund et al. (2017) | NR                          | NR                          | NR2                         |

| <b>Sample name</b> | <b>Origin</b>     | <b>Source</b>      | <b>Genetic group at K=2</b> | <b>Genetic group at K=3</b> | <b>Genetic group at K=5</b> |
|--------------------|-------------------|--------------------|-----------------------------|-----------------------------|-----------------------------|
| MO0781262          | Native range (MO) | Lund et al. (2017) | NR                          | NR                          | NR2                         |
| MO0781271          | Native range (MO) | Lund et al. (2017) | NR                          | NR                          | NR2                         |
| MO0781272          | Native range (MO) | Lund et al. (2017) | NR                          | NR                          | NR2                         |
| MO0781281          | Native range (MO) | Lund et al. (2017) | NR                          | NR                          | NR2                         |
| MO0801302          | Native range (MO) | Lund et al. (2017) | NR                          | NR                          | NR2                         |
| MO0801303          | Native range (MO) | Lund et al. (2017) | NR                          | NR                          | NR2                         |
| MO0801304          | Native range (MO) | Lund et al. (2017) | NR                          | NR                          | NR2                         |
| MO0801312          | Native range (MO) | Lund et al. (2017) | NR                          | NR                          | NR2                         |
| MO0801314          | Native range (MO) | Lund et al. (2017) | NR                          | NR                          | NR2                         |
| MO0801321          | Native range (MO) | Lund et al. (2017) | NR                          | admixed                     | admixed                     |
| MO0801322          | Native range (MO) | Lund et al. (2017) | NR                          | NR                          | NR2                         |
| MO0801323          | Native range (MO) | Lund et al. (2017) | NR                          | NR                          | NR2                         |
| NC0500751          | Native range (NC) | Lund et al. (2017) | NR                          | NR                          | NR1                         |
| NC0500761          | Native range (NC) | Lund et al. (2017) | NR                          | NR                          | NR1                         |
| NC0500763          | Native range (NC) | Lund et al. (2017) | NR                          | NR                          | NR1                         |
| NC0510781          | Native range (NC) | Lund et al. (2017) | NR                          | NR                          | NR1                         |
| NC0510782          | Native range (NC) | Lund et al. (2017) | NR                          | NR                          | NR1                         |
| NC0510783          | Native range (NC) | Lund et al. (2017) | NR                          | NR                          | NR1                         |
| NC0510784          | Native range (NC) | Lund et al. (2017) | NR                          | NR                          | NR1                         |
| NC0510791          | Native range (NC) | Lund et al. (2017) | NR                          | NR                          | NR1                         |
| NC0510793          | Native range (NC) | Lund et al. (2017) | NR                          | NR                          | admixed                     |
| NC0530811          | Native range (NC) | Lund et al. (2017) | NR                          | NR                          | NR1                         |
| NC0530813          | Native range (NC) | Lund et al. (2017) | NR                          | NR                          | NR1                         |
| NC0540821          | Native range (NC) | Lund et al. (2017) | NR                          | NR                          | admixed                     |
| NC0550824          | Native range (NC) | Lund et al. (2017) | NR                          | NR                          | NR1                         |
| NC0550832          | Native range (NC) | Lund et al. (2017) | NR                          | NR                          | NR1                         |
| NC0550841          | Native range (NC) | Lund et al. (2017) | NR                          | NR                          | NR1                         |
| NC0550842          | Native range (NC) | Lund et al. (2017) | NR                          | NR                          | NR1                         |

| <b>Sample name</b> | <b>Origin</b>     | <b>Source</b>      | <b>Genetic group at K=2</b> | <b>Genetic group at K=3</b> | <b>Genetic group at K=5</b> |
|--------------------|-------------------|--------------------|-----------------------------|-----------------------------|-----------------------------|
| NC0550843          | Native range (NC) | Lund et al. (2017) | NR                          | NR                          | NR1                         |
| NM0951512          | Native range (NM) | Lund et al. (2017) | NR                          | NR                          | admixed                     |
| NM0961522          | Native range (NM) | Lund et al. (2017) | NR                          | NR                          | admixed                     |
| NM0961523          | Native range (NM) | Lund et al. (2017) | NR                          | NR                          | admixed                     |
| NM0961524          | Native range (NM) | Lund et al. (2017) | NR                          | NR                          | admixed                     |
| NM0971531          | Native range (NM) | Lund et al. (2017) | NR                          | NR                          | admixed                     |
| NM0981542          | Native range (NM) | Lund et al. (2017) | NR                          | admixed                     | NR3                         |
| NM0981543          | Native range (NM) | Lund et al. (2017) | NR                          | NR                          | NR3                         |
| NM0991551          | Native range (NM) | Lund et al. (2017) | NR                          | admixed                     | NR3                         |
| NM0991552          | Native range (NM) | Lund et al. (2017) | NR                          | NR                          | admixed                     |
| NM0991553          | Native range (NM) | Lund et al. (2017) | NR                          | NR                          | NR3                         |
| NM1001561          | Native range (NM) | Lund et al. (2017) | NR                          | admixed                     | NR3                         |
| NM1001562          | Native range (NM) | Lund et al. (2017) | NR                          | admixed                     | admixed                     |
| NM1001563          | Native range (NM) | Lund et al. (2017) | NR                          | admixed                     | NR3                         |
| NM1011572          | Native range (NM) | Lund et al. (2017) | NR                          | NR                          | NR3                         |
| NM1021583          | Native range (NM) | Lund et al. (2017) | NR                          | NR                          | NR1                         |
| NM1041601          | Native range (NM) | Lund et al. (2017) | NR                          | admixed                     | NR3                         |
| NM1041602          | Native range (NM) | Lund et al. (2017) | NR                          | NR                          | NR1                         |
| NY0100111          | Native range (NY) | Lund et al. (2017) | admixed                     | Eu1'                        | admixed                     |
| NY0110121          | Native range (NY) | Lund et al. (2017) | Eu                          | Eu1'                        | Eu1'                        |
| NY0110122          | Native range (NY) | Lund et al. (2017) | Eu                          | Eu1'                        | Eu1'                        |
| NY0110123          | Native range (NY) | Lund et al. (2017) | Eu                          | Eu1'                        | Eu1'                        |
| NY0110131          | Native range (NY) | Lund et al. (2017) | Eu                          | Eu1'                        | Eu1'                        |
| NY0120151          | Native range (NY) | Lund et al. (2017) | Eu                          | Eu1'                        | Eu1'                        |
| NY0120161          | Native range (NY) | Lund et al. (2017) | Eu                          | Eu1'                        | Eu1'                        |
| NY0140191          | Native range (NY) | Lund et al. (2017) | Eu                          | Eu1'                        | Eu1'                        |
| NY0140192          | Native range (NY) | Lund et al. (2017) | Eu                          | Eu1'                        | Eu1'                        |
| NY0140193          | Native range (NY) | Lund et al. (2017) | Eu                          | Eu1'                        | Eu1'                        |

| <b>Sample name</b> | <b>Origin</b>     | <b>Source</b>      | <b>Genetic group at K=2</b> | <b>Genetic group at K=3</b> | <b>Genetic group at K=5</b> |
|--------------------|-------------------|--------------------|-----------------------------|-----------------------------|-----------------------------|
| NY0150201          | Native range (NY) | Lund et al. (2017) | NR                          | admixed                     | NR1                         |
| NY0160211          | Native range (NY) | Lund et al. (2017) | Eu                          | admixed                     | admixed                     |
| NY0160212          | Native range (NY) | Lund et al. (2017) | Eu                          | admixed                     | admixed                     |
| NY0160213          | Native range (NY) | Lund et al. (2017) | Eu                          | Eu1'                        | Eu1'                        |
| NY0170221          | Native range (NY) | Lund et al. (2017) | Eu                          | admixed                     | admixed                     |
| NY0180231          | Native range (NY) | Lund et al. (2017) | Eu                          | Eu1'                        | Eu1'                        |
| NY0180232          | Native range (NY) | Lund et al. (2017) | Eu                          | Eu1'                        | Eu1'                        |
| NY0200251          | Native range (NY) | Lund et al. (2017) | Eu                          | Eu1'                        | Eu1'                        |
| NY0210261          | Native range (NY) | Lund et al. (2017) | Eu                          | Eu1'                        | Eu1'                        |
| NY0220271          | Native range (NY) | Lund et al. (2017) | Eu                          | Eu1'                        | Eu1'                        |
| NY0220272          | Native range (NY) | Lund et al. (2017) | Eu                          | Eu1'                        | Eu1'                        |
| NY0230282          | Native range (NY) | Lund et al. (2017) | Eu                          | Eu1'                        | Eu1'                        |
| NY0230283          | Native range (NY) | Lund et al. (2017) | Eu                          | admixed                     | admixed                     |
| NY0240291          | Native range (NY) | Lund et al. (2017) | Eu                          | Eu1'                        | Eu1'                        |
| NY0240292          | Native range (NY) | Lund et al. (2017) | Eu                          | Eu1'                        | Eu1'                        |
| NY0250301          | Native range (NY) | Lund et al. (2017) | Eu                          | Eu1'                        | Eu1'                        |
| NY0250302          | Native range (NY) | Lund et al. (2017) | Eu                          | Eu1'                        | Eu1'                        |
| OH0280351          | Native range (OH) | Lund et al. (2017) | NR                          | NR                          | NR2                         |
| OH0280361          | Native range (OH) | Lund et al. (2017) | NR                          | NR                          | NR2                         |
| OH0280362          | Native range (OH) | Lund et al. (2017) | NR                          | NR                          | NR2                         |
| OH0280363          | Native range (OH) | Lund et al. (2017) | NR                          | NR                          | NR2                         |
| OK0811331          | Native range (OK) | Lund et al. (2017) | NR                          | NR                          | NR2                         |
| OK0811332          | Native range (OK) | Lund et al. (2017) | NR                          | NR                          | NR2                         |
| OK0811333          | Native range (OK) | Lund et al. (2017) | NR                          | NR                          | NR2                         |
| OK0821343          | Native range (OK) | Lund et al. (2017) | NR                          | NR                          | NR2                         |
| PA0260311          | Native range (PA) | Lund et al. (2017) | Eu                          | Eu1'                        | Eu1'                        |
| PA0270321          | Native range (PA) | Lund et al. (2017) | Eu                          | Eu1'                        | Eu1'                        |
| PA0270322          | Native range (PA) | Lund et al. (2017) | Eu                          | Eu1'                        | Eu1'                        |

| Sample name | Origin            | Source             | Genetic group at K=2 | Genetic group at K=3 | Genetic group at K=5 |
|-------------|-------------------|--------------------|----------------------|----------------------|----------------------|
| PA0270325   | Native range (PA) | Lund et al. (2017) | Eu                   | Eu1'                 | Eu1'                 |
| PA0270331   | Native range (PA) | Lund et al. (2017) | Eu                   | Eu1'                 | admixed              |
| PA0270332   | Native range (PA) | Lund et al. (2017) | Eu                   | Eu1'                 | Eu1'                 |
| PA0270333   | Native range (PA) | Lund et al. (2017) | Eu                   | Eu1'                 | Eu1'                 |
| PA0270341   | Native range (PA) | Lund et al. (2017) | Eu                   | Eu1'                 | admixed              |
| SD0360451   | Native range (SD) | Lund et al. (2017) | Eu                   | Eu1'                 | Eu1'                 |
| SD0360452   | Native range (SD) | Lund et al. (2017) | admixed              | Eu1'                 | admixed              |
| SD0360461   | Native range (SD) | Lund et al. (2017) | Eu                   | Eu1'                 | admixed              |
| SD0360462   | Native range (SD) | Lund et al. (2017) | NR                   | admixed              | NR1                  |
| SD0370471   | Native range (SD) | Lund et al. (2017) | Eu                   | Eu1'                 | admixed              |
| SD0370472   | Native range (SD) | Lund et al. (2017) | admixed              | Eu1'                 | admixed              |
| SD0370473   | Native range (SD) | Lund et al. (2017) | admixed              | Eu1'                 | admixed              |
| SD0370481   | Native range (SD) | Lund et al. (2017) | admixed              | admixed              | admixed              |
| SD0370482   | Native range (SD) | Lund et al. (2017) | Eu                   | Eu1'                 | Eu1'                 |
| SD0370483   | Native range (SD) | Lund et al. (2017) | admixed              | Eu1'                 | admixed              |
| SD0370491   | Native range (SD) | Lund et al. (2017) | Eu                   | Eu1'                 | Eu1'                 |
| SD0370492   | Native range (SD) | Lund et al. (2017) | NR                   | admixed              | admixed              |
| SD0370502   | Native range (SD) | Lund et al. (2017) | admixed              | admixed              | NR3                  |
| SD0370503   | Native range (SD) | Lund et al. (2017) | Eu                   | Eu1'                 | Eu1'                 |
| TN0580881   | Native range (TN) | Lund et al. (2017) | admixed              | admixed              | NR2                  |
| TN0580891   | Native range (TN) | Lund et al. (2017) | NR                   | NR                   | NR2                  |
| TN0580892   | Native range (TN) | Lund et al. (2017) | NR                   | NR                   | NR2                  |
| TN0580893   | Native range (TN) | Lund et al. (2017) | NR                   | NR                   | NR2                  |
| TN0580901   | Native range (TN) | Lund et al. (2017) | NR                   | NR                   | NR2                  |
| TN0590911   | Native range (TN) | Lund et al. (2017) | NR                   | NR                   | NR2                  |
| TN0590913   | Native range (TN) | Lund et al. (2017) | NR                   | NR                   | NR2                  |
| TN0590914   | Native range (TN) | Lund et al. (2017) | NR                   | NR                   | NR2                  |
| TN0590921   | Native range (TN) | Lund et al. (2017) | NR                   | NR                   | NR2                  |

| Sample name | Origin            | Source             | Genetic group at K=2 | Genetic group at K=3 | Genetic group at K=5 |
|-------------|-------------------|--------------------|----------------------|----------------------|----------------------|
| TN0590923   | Native range (TN) | Lund et al. (2017) | NR                   | NR                   | NR2                  |
| TN0590925   | Native range (TN) | Lund et al. (2017) | NR                   | NR                   | NR2                  |
| TN0590931   | Native range (TN) | Lund et al. (2017) | NR                   | NR                   | NR2                  |
| TN0590932   | Native range (TN) | Lund et al. (2017) | NR                   | NR                   | NR2                  |
| TN0590934   | Native range (TN) | Lund et al. (2017) | NR                   | NR                   | NR2                  |
| TN0600941   | Native range (TN) | Lund et al. (2017) | NR                   | NR                   | NR2                  |
| TN0600952   | Native range (TN) | Lund et al. (2017) | NR                   | NR                   | NR2                  |
| TN0600954   | Native range (TN) | Lund et al. (2017) | NR                   | NR                   | NR2                  |
| TN0610961   | Native range (TN) | Lund et al. (2017) | NR                   | admixed              | NR1                  |
| TN0610962   | Native range (TN) | Lund et al. (2017) | NR                   | NR                   | NR1                  |
| TN0610963   | Native range (TN) | Lund et al. (2017) | NR                   | NR                   | NR1                  |
| TN0610964   | Native range (TN) | Lund et al. (2017) | NR                   | NR                   | NR1                  |
| TN0620971   | Native range (TN) | Lund et al. (2017) | NR                   | NR                   | NR2                  |
| TN0620972   | Native range (TN) | Lund et al. (2017) | admixed              | admixed              | admixed              |
| TN0620974   | Native range (TN) | Lund et al. (2017) | NR                   | NR                   | NR2                  |
| TN0630983   | Native range (TN) | Lund et al. (2017) | NR                   | NR                   | NR2                  |
| TN0630991   | Native range (TN) | Lund et al. (2017) | NR                   | NR                   | NR2                  |
| TN0630992   | Native range (TN) | Lund et al. (2017) | NR                   | NR                   | NR2                  |
| TN0630993   | Native range (TN) | Lund et al. (2017) | NR                   | NR                   | NR2                  |
| TN0641001   | Native range (TN) | Lund et al. (2017) | NR                   | NR                   | NR2                  |
| TN0641011   | Native range (TN) | Lund et al. (2017) | NR                   | NR                   | admixed              |
| TN0641012   | Native range (TN) | Lund et al. (2017) | NR                   | NR                   | NR2                  |
| TN0641014   | Native range (TN) | Lund et al. (2017) | NR                   | NR                   | NR2                  |
| TN0651021   | Native range (TN) | Lund et al. (2017) | NR                   | NR                   | NR2                  |
| TN0651022   | Native range (TN) | Lund et al. (2017) | NR                   | NR                   | admixed              |
| TN0661031   | Native range (TN) | Lund et al. (2017) | NR                   | NR                   | NR2                  |
| TN0661033   | Native range (TN) | Lund et al. (2017) | NR                   | NR                   | NR2                  |
| TN0661034   | Native range (TN) | Lund et al. (2017) | NR                   | NR                   | admixed              |



| Sample name | Origin                  | Source             | Genetic group at K=2 | Genetic group at K=3 | Genetic group at K=5 |
|-------------|-------------------------|--------------------|----------------------|----------------------|----------------------|
| TN0661035   | Native range (TN)       | Lund et al. (2017) | NR                   | NR                   | NR2                  |
| TN0661041   | Native range (TN)       | Lund et al. (2017) | NR                   | NR                   | NR2                  |
| TN0661044   | Native range (TN)       | Lund et al. (2017) | NR                   | NR                   | NR2                  |
| TN0661051   | Native range (TN)       | Lund et al. (2017) | NR                   | NR                   | NR2                  |
| TN0671062   | Native range (TN)       | Lund et al. (2017) | NR                   | NR                   | NR2                  |
| TN0671063   | Native range (TN)       | Lund et al. (2017) | NR                   | NR                   | NR2                  |
| TN0671064   | Native range (TN)       | Lund et al. (2017) | NR                   | NR                   | NR2                  |
| TX0831355   | Native range (TX)       | Lund et al. (2017) | NR                   | NR                   | NR2                  |
| TX0841361   | Native range (TX)       | Lund et al. (2017) | NR                   | NR                   | NR2                  |
| TX0841362   | Native range (TX)       | Lund et al. (2017) | NR                   | NR                   | NR2                  |
| TX0841363   | Native range (TX)       | Lund et al. (2017) | NR                   | NR                   | NR2                  |
| TX0841365   | Native range (TX)       | Lund et al. (2017) | NR                   | NR                   | NR2                  |
| TX0841371   | Native range (TX)       | Lund et al. (2017) | NR                   | NR                   | NR2                  |
| TX0851383   | Native range (TX)       | Lund et al. (2017) | NR                   | NR                   | NR2                  |
| TX0851391   | Native range (TX)       | Lund et al. (2017) | NR                   | admixed              | admixed              |
| TX0851392   | Native range (TX)       | Lund et al. (2017) | NR                   | NR                   | NR2                  |
| URU1081771  | Introduced region (URU) | Lund et al. (2017) | Eu                   | admixed              | admixed              |
| URU1081781  | Introduced region (URU) | Lund et al. (2017) | Eu                   | Eu1'                 | Eu1'                 |
| URU1081791  | Introduced region (URU) | Lund et al. (2017) | Eu                   | Eu1'                 | Eu1'                 |
| URU1081801  | Introduced region (URU) | Lund et al. (2017) | Eu                   | Eu1'                 | admixed              |
| UT1051611   | Native range (UT)       | Lund et al. (2017) | NR                   | NR                   | admixed              |
| UT1051613   | Native range (UT)       | Lund et al. (2017) | NR                   | NR                   | NR2                  |
| VA0410561   | Native range (VA)       | Lund et al. (2017) | NR                   | NR                   | NR1                  |
| VA0420571   | Native range (VA)       | Lund et al. (2017) | NR                   | NR                   | NR2                  |
| VA0420581   | Native range (VA)       | Lund et al. (2017) | NR                   | NR                   | NR2                  |
| VA0420582   | Native range (VA)       | Lund et al. (2017) | NR                   | NR                   | admixed              |
| VA0420591   | Native range (VA)       | Lund et al. (2017) | NR                   | NR                   | admixed              |
| VA0420592   | Native range (VA)       | Lund et al. (2017) | NR                   | NR                   | admixed              |

| <b>Sample name</b> | <b>Origin</b>     | <b>Source</b>      | <b>Genetic group at K=2</b> | <b>Genetic group at K=3</b> | <b>Genetic group at K=5</b> |
|--------------------|-------------------|--------------------|-----------------------------|-----------------------------|-----------------------------|
| VA0430601          | Native range (VA) | Lund et al. (2017) | NR                          | NR                          | admixed                     |
| VA0430611          | Native range (VA) | Lund et al. (2017) | NR                          | NR                          | admixed                     |
| VA0430612          | Native range (VA) | Lund et al. (2017) | admixed                     | admixed                     | admixed                     |
| VA0440621          | Native range (VA) | Lund et al. (2017) | NR                          | NR                          | NR1                         |
| VA0440631          | Native range (VA) | Lund et al. (2017) | NR                          | NR                          | NR1                         |
| VA0440632          | Native range (VA) | Lund et al. (2017) | NR                          | NR                          | NR1                         |
| VA0440641          | Native range (VA) | Lund et al. (2017) | NR                          | NR                          | admixed                     |
| VA0450661          | Native range (VA) | Lund et al. (2017) | NR                          | NR                          | NR1                         |
| VA0450662          | Native range (VA) | Lund et al. (2017) | NR                          | NR                          | NR1                         |
| VA0450671          | Native range (VA) | Lund et al. (2017) | NR                          | NR                          | NR1                         |
| VA0450672          | Native range (VA) | Lund et al. (2017) | NR                          | NR                          | admixed                     |
| VA0460681          | Native range (VA) | Lund et al. (2017) | admixed                     | admixed                     | NR1                         |
| VA0460682          | Native range (VA) | Lund et al. (2017) | NR                          | NR                          | NR1                         |
| VA0470691          | Native range (VA) | Lund et al. (2017) | admixed                     | admixed                     | NR1                         |
| VA0480711          | Native range (VA) | Lund et al. (2017) | NR                          | NR                          | admixed                     |
| VA0480712          | Native range (VA) | Lund et al. (2017) | NR                          | NR                          | NR1                         |
| VA0490721          | Native range (VA) | Lund et al. (2017) | NR                          | NR                          | NR1                         |
| VA0490723          | Native range (VA) | Lund et al. (2017) | NR                          | NR                          | NR1                         |
| VA0490725          | Native range (VA) | Lund et al. (2017) | NR                          | NR                          | NR1                         |
| VA0490732          | Native range (VA) | Lund et al. (2017) | NR                          | NR                          | NR1                         |
| VA0490741          | Native range (VA) | Lund et al. (2017) | NR                          | NR                          | NR1                         |
| VA0490742          | Native range (VA) | Lund et al. (2017) | NR                          | NR                          | NR1                         |
| VA0490743          | Native range (VA) | Lund et al. (2017) | NR                          | NR                          | NR1                         |
| WV0380511          | Native range (WV) | Lund et al. (2017) | NR                          | NR                          | NR2                         |
| WV0380512          | Native range (WV) | Lund et al. (2017) | NR                          | NR                          | NR2                         |
| WV0380513          | Native range (WV) | Lund et al. (2017) | NR                          | NR                          | NR2                         |
| WV0390521          | Native range (WV) | Lund et al. (2017) | NR                          | NR                          | NR2                         |
| WV0400531          | Native range (WV) | Lund et al. (2017) | NR                          | NR                          | NR2                         |

| <b>Sample name</b> | <b>Origin</b>     | <b>Source</b>      | <b>Genetic group at K=2</b> | <b>Genetic group at K=3</b> | <b>Genetic group at K=5</b> |
|--------------------|-------------------|--------------------|-----------------------------|-----------------------------|-----------------------------|
| WV0400532          | Native range (WV) | Lund et al. (2017) | NR                          | NR                          | NR2                         |
| WV0400541          | Native range (WV) | Lund et al. (2017) | NR                          | NR                          | NR2                         |
| WV0400542          | Native range (WV) | Lund et al. (2017) | NR                          | NR                          | NR2                         |
| WV0400543          | Native range (WV) | Lund et al. (2017) | NR                          | NR                          | NR2                         |
| WV0400551          | Native range (WV) | Lund et al. (2017) | NR                          | NR                          | NR2                         |
| WV0400552          | Native range (WV) | Lund et al. (2017) | NR                          | NR                          | NR2                         |
| WV0400553          | Native range (WV) | Lund et al. (2017) | NR                          | NR                          | NR2                         |
| WV0400554          | Native range (WV) | Lund et al. (2017) | NR                          | NR                          | NR2                         |

**Supplementary Table S3.** List of the 1173 grape phylloxera individuals included in this study. For each sample, we indicate the sampling site (country), host plant and grape phylloxera feeding form.

| Sample code | Sampling location (lat, long) | Sampling year | Country <sup>1</sup> | Host plant                                              | Phylloxera feeding form |
|-------------|-------------------------------|---------------|----------------------|---------------------------------------------------------|-------------------------|
| AUT001      | 48.41, 15.61                  | 2018          | AUT                  | <i>Vitis vinifera</i> L. cultivar                       | Leaf-feeding form       |
| AUT002      | 48.41, 15.61                  | 2018          | AUT                  | <i>Vitis vinifera</i> L. cultivar                       | Leaf-feeding form       |
| AUT003      | 48.41, 15.61                  | 2018          | AUT                  | <i>Vitis vinifera</i> L. cultivar                       | Leaf-feeding form       |
| AUT004      | 48.41, 15.61                  | 2018          | AUT                  | <i>Vitis vinifera</i> L. cultivar                       | Leaf-feeding form       |
| AUT005      | 48.41, 15.61                  | 2018          | AUT                  | <i>Vitis vinifera</i> L. cultivar                       | Leaf-feeding form       |
| AUT006      | 48.41, 15.61                  | 2018          | AUT                  | <i>Vitis</i> spp. interspecific resistant grape variety | Leaf-feeding form       |
| AUT007      | 48.41, 15.61                  | 2018          | AUT                  | <i>Vitis</i> spp. interspecific resistant grape variety | Leaf-feeding form       |
| AUT008      | 48.41, 15.61                  | 2018          | AUT                  | <i>Vitis</i> spp. interspecific resistant grape variety | Leaf-feeding form       |
| AUT009      | 48.41, 15.61                  | 2018          | AUT                  | <i>Vitis</i> spp. interspecific resistant grape variety | Leaf-feeding form       |
| AUT010      | 48.41, 15.61                  | 2018          | AUT                  | <i>Vitis vinifera</i> L. cultivar                       | Leaf-feeding form       |
| AUT011      | 48.41, 15.61                  | 2018          | AUT                  | <i>Vitis vinifera</i> L. cultivar                       | Leaf-feeding form       |
| AUT012      | 48.41, 15.61                  | 2018          | AUT                  | <i>Vitis vinifera</i> L. cultivar                       | Leaf-feeding form       |
| AUT013      | 48.41, 15.61                  | 2018          | AUT                  | <i>Vitis vinifera</i> L. cultivar                       | Leaf-feeding form       |
| AUT014      | 48.41, 15.61                  | 2018          | AUT                  | <i>Vitis vinifera</i> L. cultivar                       | Leaf-feeding form       |
| AUT015      | 48.41, 15.61                  | 2018          | AUT                  | <i>Vitis</i> spp. interspecific resistant grape variety | Leaf-feeding form       |
| AUT016      | 48.41, 15.61                  | 2018          | AUT                  | <i>Vitis</i> spp. interspecific resistant grape variety | Leaf-feeding form       |
| AUT017      | 48.41, 15.61                  | 2018          | AUT                  | <i>Vitis</i> spp. interspecific resistant grape variety | Leaf-feeding form       |
| AUT018      | 48.32, 16.07                  | 2018          | AUT                  | <i>Vitis</i> spp. interspecific rootstock               | Leaf-feeding form       |
| AUT019      | 48.32, 16.07                  | 2018          | AUT                  | <i>Vitis</i> spp. interspecific rootstock               | Leaf-feeding form       |
| AUT020      | 48.32, 16.07                  | 2018          | AUT                  | <i>Vitis</i> spp. interspecific rootstock               | Leaf-feeding form       |
| AUT021      | 48.32, 16.07                  | 2019          | AUT                  | <i>Vitis</i> spp. interspecific rootstock               | Leaf-feeding form       |
| AUT022      | 48.32, 16.07                  | 2019          | AUT                  | <i>Vitis</i> spp. interspecific rootstock               | Leaf-feeding form       |
| AUT023      | 48.32, 16.07                  | 2019          | AUT                  | <i>Vitis</i> spp. interspecific rootstock               | Leaf-feeding form       |
| AUT024      | 48.37, 16.41                  | 2012          | AUT                  | <i>Vitis</i> spp. interspecific rootstock               | Leaf-feeding form       |
| AUT025      | 48.37, 16.41                  | 2012          | AUT                  | <i>Vitis</i> spp. interspecific rootstock               | Leaf-feeding form       |

| <b>Sample code</b> | <b>Sampling location (lat, long)</b> | <b>Sampling year</b> | <b>Country<sup>1</sup></b> | <b>Host plant</b>                         | <b>Phylloxera feeding form</b> |
|--------------------|--------------------------------------|----------------------|----------------------------|-------------------------------------------|--------------------------------|
| AUT026             | 48.37, 16.41                         | 2012                 | AUT                        | <i>Vitis</i> spp. interspecific rootstock | Leaf-feeding form              |
| AUT027             | 48.37, 16.41                         | 2012                 | AUT                        | <i>Vitis</i> spp. interspecific rootstock | Leaf-feeding form              |
| AUT028             | 48.37, 16.41                         | 2012                 | AUT                        | <i>Vitis</i> spp. interspecific rootstock | Leaf-feeding form              |
| AUT029             | 48.37, 16.41                         | 2012                 | AUT                        | <i>Vitis</i> spp. interspecific rootstock | Leaf-feeding form              |
| AUT030             | 48.37, 16.41                         | 2012                 | AUT                        | <i>Vitis</i> spp. interspecific rootstock | Leaf-feeding form              |
| AUT031             | 48.37, 16.41                         | 2012                 | AUT                        | <i>Vitis</i> spp. interspecific rootstock | Leaf-feeding form              |
| AUT032             | 48.37, 16.41                         | 2012                 | AUT                        | <i>Vitis</i> spp. interspecific rootstock | Leaf-feeding form              |
| AUT033             | 48.37, 16.41                         | 2012                 | AUT                        | <i>Vitis</i> spp. interspecific rootstock | Leaf-feeding form              |
| AUT034             | 48.37, 16.41                         | 2012                 | AUT                        | <i>Vitis</i> spp. interspecific rootstock | Leaf-feeding form              |
| AUT035             | 48.37, 16.41                         | 2012                 | AUT                        | <i>Vitis</i> spp. interspecific rootstock | Leaf-feeding form              |
| AUT036             | 48.37, 16.41                         | 2012                 | AUT                        | <i>Vitis</i> spp. interspecific rootstock | Leaf-feeding form              |
| AUT037             | 48.37, 16.41                         | 2012                 | AUT                        | <i>Vitis</i> spp. interspecific rootstock | Leaf-feeding form              |
| AUT038             | 48.37, 16.41                         | 2012                 | AUT                        | <i>Vitis</i> spp. interspecific rootstock | Leaf-feeding form              |
| AUT039             | 48.37, 16.41                         | 2012                 | AUT                        | <i>Vitis</i> spp. interspecific rootstock | Leaf-feeding form              |
| AUT040             | 48.37, 16.41                         | 2012                 | AUT                        | <i>Vitis</i> spp. interspecific rootstock | Leaf-feeding form              |
| AUT041             | 48.37, 16.41                         | 2012                 | AUT                        | <i>Vitis</i> spp. interspecific rootstock | Leaf-feeding form              |
| AUT042             | 48.37, 16.41                         | 2012                 | AUT                        | <i>Vitis</i> spp. interspecific rootstock | Leaf-feeding form              |
| AUT043             | 48.37, 16.41                         | 2012                 | AUT                        | <i>Vitis</i> spp. interspecific rootstock | Leaf-feeding form              |
| AUT044             | 48.37, 16.41                         | 2012                 | AUT                        | <i>Vitis</i> spp. interspecific rootstock | Leaf-feeding form              |
| AUT045             | 48.37, 16.41                         | 2012                 | AUT                        | <i>Vitis</i> spp. interspecific rootstock | Leaf-feeding form              |
| AUT046             | 48.37, 16.41                         | 2012                 | AUT                        | <i>Vitis</i> spp. interspecific rootstock | Leaf-feeding form              |
| AUT047             | 48.37, 16.41                         | 2012                 | AUT                        | <i>Vitis</i> spp. interspecific rootstock | Leaf-feeding form              |
| AUT048             | 48.37, 16.41                         | 2012                 | AUT                        | <i>Vitis</i> spp. interspecific rootstock | Leaf-feeding form              |
| AUT049             | 48.37, 16.41                         | 2012                 | AUT                        | <i>Vitis</i> spp. interspecific rootstock | Leaf-feeding form              |
| AUT050             | 48.37, 16.41                         | 2012                 | AUT                        | <i>Vitis</i> spp. interspecific rootstock | Leaf-feeding form              |
| AUT051             | 48.37, 16.41                         | 2012                 | AUT                        | <i>Vitis</i> spp. interspecific rootstock | Leaf-feeding form              |
| AUT052             | 48.37, 16.41                         | 2012                 | AUT                        | <i>Vitis</i> spp. interspecific rootstock | Leaf-feeding form              |

| <b>Sample code</b> | <b>Sampling location (lat, long)</b> | <b>Sampling year</b> | <b>Country<sup>1</sup></b> | <b>Host plant</b>                         | <b>Phylloxera feeding form</b> |
|--------------------|--------------------------------------|----------------------|----------------------------|-------------------------------------------|--------------------------------|
| AUT053             | 48.37, 16.41                         | 2012                 | AUT                        | <i>Vitis</i> spp. interspecific rootstock | Leaf-feeding form              |
| AUT054             | 48.31, 16.37                         | n.a.                 | AUT                        | <i>Vitis</i> spp. interspecific rootstock | Leaf-feeding form              |
| AUT055             | 48.31, 16.37                         | n.a.                 | AUT                        | <i>Vitis</i> spp. interspecific rootstock | Leaf-feeding form              |
| AUT056             | 48.31, 16.37                         | n.a.                 | AUT                        | <i>Vitis</i> spp. interspecific rootstock | Leaf-feeding form              |
| AUT057             | 48.31, 16.37                         | n.a.                 | AUT                        | <i>Vitis</i> spp. interspecific rootstock | Leaf-feeding form              |
| AUT058             | 48.31, 16.37                         | n.a.                 | AUT                        | <i>Vitis</i> spp. interspecific rootstock | Leaf-feeding form              |
| AUT059             | 48.31, 16.37                         | n.a.                 | AUT                        | <i>Vitis</i> spp. interspecific rootstock | Leaf-feeding form              |
| AUT060             | 48.31, 16.37                         | n.a.                 | AUT                        | <i>Vitis</i> spp. interspecific rootstock | Leaf-feeding form              |
| AUT061             | 48.31, 16.37                         | n.a.                 | AUT                        | <i>Vitis</i> spp. interspecific rootstock | Leaf-feeding form              |
| AUT062             | 48.31, 16.37                         | n.a.                 | AUT                        | <i>Vitis</i> spp. interspecific rootstock | Leaf-feeding form              |
| AUT063             | 48.31, 16.37                         | n.a.                 | AUT                        | <i>Vitis</i> spp. interspecific rootstock | Leaf-feeding form              |
| AUT064             | 48.31, 16.37                         | n.a.                 | AUT                        | <i>Vitis</i> spp. interspecific rootstock | Leaf-feeding form              |
| AUT065             | 48.31, 16.37                         | n.a.                 | AUT                        | <i>Vitis</i> spp. interspecific rootstock | Leaf-feeding form              |
| AUT066             | 48.31, 16.37                         | n.a.                 | AUT                        | <i>Vitis</i> spp. interspecific rootstock | Leaf-feeding form              |
| AUT067             | 48.31, 16.37                         | n.a.                 | AUT                        | <i>Vitis</i> spp. interspecific rootstock | Leaf-feeding form              |
| AUT068             | 48.31, 16.37                         | n.a.                 | AUT                        | <i>Vitis</i> spp. interspecific rootstock | Leaf-feeding form              |
| AUT069             | 48.31, 16.37                         | n.a.                 | AUT                        | <i>Vitis</i> spp. interspecific rootstock | Leaf-feeding form              |
| AUT070             | 48.31, 16.37                         | n.a.                 | AUT                        | <i>Vitis</i> spp. interspecific rootstock | Leaf-feeding form              |
| AUT071             | 48.31, 16.37                         | n.a.                 | AUT                        | <i>Vitis</i> spp. interspecific rootstock | Leaf-feeding form              |
| AUT072             | 48.31, 16.37                         | n.a.                 | AUT                        | <i>Vitis</i> spp. interspecific rootstock | Leaf-feeding form              |
| AUT073             | 48.31, 16.37                         | n.a.                 | AUT                        | <i>Vitis</i> spp. interspecific rootstock | Leaf-feeding form              |
| AUT074             | 48.31, 16.37                         | n.a.                 | AUT                        | <i>Vitis</i> spp. interspecific rootstock | Leaf-feeding form              |
| AUT075             | 48.31, 16.37                         | n.a.                 | AUT                        | <i>Vitis</i> spp. interspecific rootstock | Leaf-feeding form              |
| AUT076             | 48.31, 16.37                         | n.a.                 | AUT                        | <i>Vitis</i> spp. interspecific rootstock | Leaf-feeding form              |
| AUT077             | 48.31, 16.37                         | n.a.                 | AUT                        | <i>Vitis</i> spp. interspecific rootstock | Leaf-feeding form              |
| AUT078             | 48.31, 16.37                         | n.a.                 | AUT                        | <i>Vitis</i> spp. interspecific rootstock | Leaf-feeding form              |
| AUT079             | 48.31, 16.37                         | n.a.                 | AUT                        | <i>Vitis</i> spp. interspecific rootstock | Leaf-feeding form              |

| Sample code | Sampling location (lat, long) | Sampling year | Country <sup>1</sup> | Host plant                                | Phylloxera feeding form |
|-------------|-------------------------------|---------------|----------------------|-------------------------------------------|-------------------------|
| AUT080      | 48.31, 16.37                  | n.a.          | AUT                  | <i>Vitis</i> spp. interspecific rootstock | Leaf-feeding form       |
| AUT081      | 48.31, 16.37                  | n.a.          | AUT                  | <i>Vitis</i> spp. interspecific rootstock | Leaf-feeding form       |
| AUT082      | 47.76, 16.66                  | 2015          | AUT                  | <i>Vitis</i> spp. interspecific rootstock | Leaf-feeding form       |
| AUT083      | 47.76, 16.66                  | 2015          | AUT                  | <i>Vitis</i> spp. interspecific rootstock | Leaf-feeding form       |
| AUT084      | 47.76, 16.66                  | 2015          | AUT                  | <i>Vitis</i> spp. interspecific rootstock | Leaf-feeding form       |
| AUT085      | 47.76, 16.66                  | 2015          | AUT                  | <i>Vitis</i> spp. interspecific rootstock | Leaf-feeding form       |
| AUT086      | 47.76, 16.66                  | 2015          | AUT                  | <i>Vitis</i> spp. interspecific rootstock | Leaf-feeding form       |
| AUT087      | 47.76, 16.66                  | 2015          | AUT                  | <i>Vitis</i> spp. interspecific rootstock | Leaf-feeding form       |
| AUT088      | 47.76, 16.66                  | 2015          | AUT                  | <i>Vitis</i> spp. interspecific rootstock | Leaf-feeding form       |
| AUT089      | 47.76, 16.66                  | 2015          | AUT                  | <i>Vitis</i> spp. interspecific rootstock | Leaf-feeding form       |
| AUT090      | 47.76, 16.66                  | 2015          | AUT                  | <i>Vitis</i> spp. interspecific rootstock | Leaf-feeding form       |
| AUT091      | 47.76, 16.66                  | 2015          | AUT                  | <i>Vitis</i> spp. interspecific rootstock | Leaf-feeding form       |
| AUT092      | 47.76, 16.66                  | 2015          | AUT                  | <i>Vitis</i> spp. interspecific rootstock | Leaf-feeding form       |
| AUT093      | 47.76, 16.66                  | 2015          | AUT                  | <i>Vitis</i> spp. interspecific rootstock | Leaf-feeding form       |
| AUT094      | 47.76, 16.66                  | 2015          | AUT                  | <i>Vitis</i> spp. interspecific rootstock | Leaf-feeding form       |
| AUT095      | 48.35, 15.75                  | 2015          | AUT                  | <i>Vitis</i> spp. interspecific rootstock | Leaf-feeding form       |
| AUT096      | 48.35, 15.75                  | 2015          | AUT                  | <i>Vitis</i> spp. interspecific rootstock | Leaf-feeding form       |
| AUT097      | 48.35, 15.75                  | 2015          | AUT                  | <i>Vitis</i> spp. interspecific rootstock | Leaf-feeding form       |
| AUT098      | 48.35, 15.75                  | 2015          | AUT                  | <i>Vitis</i> spp. interspecific rootstock | Leaf-feeding form       |
| AUT099      | 48.35, 15.75                  | 2015          | AUT                  | <i>Vitis</i> spp. interspecific rootstock | Leaf-feeding form       |
| AUT100      | 48.35, 15.75                  | 2015          | AUT                  | <i>Vitis</i> spp. interspecific rootstock | Leaf-feeding form       |
| AUT101      | 48.35, 15.75                  | 2015          | AUT                  | <i>Vitis</i> spp. interspecific rootstock | Leaf-feeding form       |
| AUT102      | 48.35, 15.75                  | 2015          | AUT                  | <i>Vitis</i> spp. interspecific rootstock | Leaf-feeding form       |
| AUT103      | 48.35, 15.75                  | 2015          | AUT                  | <i>Vitis</i> spp. interspecific rootstock | Leaf-feeding form       |
| AUT104      | 48.35, 15.75                  | 2015          | AUT                  | <i>Vitis</i> spp. interspecific rootstock | Leaf-feeding form       |
| AUT105      | 48.35, 15.75                  | 2015          | AUT                  | <i>Vitis</i> spp. interspecific rootstock | Leaf-feeding form       |
| AUT106      | 48.35, 15.75                  | 2015          | AUT                  | <i>Vitis</i> spp. interspecific rootstock | Leaf-feeding form       |

| <b>Sample code</b> | <b>Sampling location (lat, long)</b> | <b>Sampling year</b> | <b>Country<sup>1</sup></b> | <b>Host plant</b>                         | <b>Phylloxera feeding form</b> |
|--------------------|--------------------------------------|----------------------|----------------------------|-------------------------------------------|--------------------------------|
| AUT107             | 48.35, 15.75                         | 2015                 | AUT                        | <i>Vitis</i> spp. interspecific rootstock | Leaf-feeding form              |
| AUT108             | 48.35, 15.75                         | 2015                 | AUT                        | <i>Vitis</i> spp. interspecific rootstock | Leaf-feeding form              |
| AUT109             | 48.35, 15.75                         | 2015                 | AUT                        | <i>Vitis</i> spp. interspecific rootstock | Leaf-feeding form              |
| AUT110             | 48.35, 15.75                         | 2015                 | AUT                        | <i>Vitis</i> spp. interspecific rootstock | Leaf-feeding form              |
| AUT111             | 48.35, 15.75                         | 2015                 | AUT                        | <i>Vitis</i> spp. interspecific rootstock | Leaf-feeding form              |
| AUT112             | 48.35, 15.75                         | 2015                 | AUT                        | <i>Vitis</i> spp. interspecific rootstock | Leaf-feeding form              |
| AUT113             | 48.35, 15.75                         | 2015                 | AUT                        | <i>Vitis</i> spp. interspecific rootstock | Leaf-feeding form              |
| AUT114             | 48.35, 15.75                         | 2015                 | AUT                        | <i>Vitis</i> spp. interspecific rootstock | Leaf-feeding form              |
| AUT115             | 48.35, 15.75                         | 2015                 | AUT                        | <i>Vitis</i> spp. interspecific rootstock | Leaf-feeding form              |
| AUT116             | 48.35, 15.75                         | 2015                 | AUT                        | <i>Vitis</i> spp. interspecific rootstock | Leaf-feeding form              |
| AUT117             | 48.35, 15.75                         | 2015                 | AUT                        | <i>Vitis</i> spp. interspecific rootstock | Leaf-feeding form              |
| AUT118             | 48.35, 15.75                         | 2015                 | AUT                        | <i>Vitis</i> spp. interspecific rootstock | Leaf-feeding form              |
| AUT119             | 48.35, 15.75                         | 2015                 | AUT                        | <i>Vitis</i> spp. interspecific rootstock | Leaf-feeding form              |
| AUT120             | 48.35, 15.75                         | 2015                 | AUT                        | <i>Vitis</i> spp. interspecific rootstock | Leaf-feeding form              |
| AUT121             | 48.35, 15.75                         | 2015                 | AUT                        | <i>Vitis</i> spp. interspecific rootstock | Leaf-feeding form              |
| AUT122             | 48.32, 15.73                         | 2015                 | AUT                        | <i>Vitis</i> spp. interspecific rootstock | Leaf-feeding form              |
| AUT123             | 48.32, 15.73                         | 2015                 | AUT                        | <i>Vitis</i> spp. interspecific rootstock | Leaf-feeding form              |
| AUT124             | 48.32, 15.73                         | 2015                 | AUT                        | <i>Vitis</i> spp. interspecific rootstock | Leaf-feeding form              |
| AUT125             | 48.32, 15.73                         | 2015                 | AUT                        | <i>Vitis</i> spp. interspecific rootstock | Leaf-feeding form              |
| AUT126             | 48.32, 15.73                         | 2015                 | AUT                        | <i>Vitis</i> spp. interspecific rootstock | Leaf-feeding form              |
| AUT127             | 48.32, 15.73                         | 2015                 | AUT                        | <i>Vitis</i> spp. interspecific rootstock | Leaf-feeding form              |
| AUT128             | 48.32, 15.73                         | 2015                 | AUT                        | <i>Vitis</i> spp. interspecific rootstock | Leaf-feeding form              |
| AUT129             | 48.32, 15.73                         | 2015                 | AUT                        | <i>Vitis</i> spp. interspecific rootstock | Leaf-feeding form              |
| AUT130             | 48.32, 15.73                         | 2015                 | AUT                        | <i>Vitis</i> spp. interspecific rootstock | Leaf-feeding form              |
| AUT131             | 48.32, 15.73                         | 2015                 | AUT                        | <i>Vitis</i> spp. interspecific rootstock | Leaf-feeding form              |
| AUT132             | 48.32, 15.73                         | 2015                 | AUT                        | <i>Vitis</i> spp. interspecific rootstock | Leaf-feeding form              |
| AUT133             | 48.32, 15.73                         | 2015                 | AUT                        | <i>Vitis</i> spp. interspecific rootstock | Leaf-feeding form              |



| <b>Sample code</b> | <b>Sampling location (lat, long)</b> | <b>Sampling year</b> | <b>Country<sup>1</sup></b> | <b>Host plant</b>                         | <b>Phylloxera feeding form</b> |
|--------------------|--------------------------------------|----------------------|----------------------------|-------------------------------------------|--------------------------------|
| AUT134             | 48.32, 15.73                         | 2015                 | AUT                        | <i>Vitis</i> spp. interspecific rootstock | Leaf-feeding form              |
| AUT135             | 48.32, 15.73                         | 2015                 | AUT                        | <i>Vitis</i> spp. interspecific rootstock | Leaf-feeding form              |
| AUT136             | 48.32, 15.73                         | 2015                 | AUT                        | <i>Vitis</i> spp. interspecific rootstock | Leaf-feeding form              |
| AUT137             | 48.32, 15.73                         | 2015                 | AUT                        | <i>Vitis</i> spp. interspecific rootstock | Leaf-feeding form              |
| AUT138             | 48.32, 15.73                         | 2015                 | AUT                        | <i>Vitis</i> spp. interspecific rootstock | Leaf-feeding form              |
| AUT139             | 48.32, 15.73                         | 2015                 | AUT                        | <i>Vitis</i> spp. interspecific rootstock | Leaf-feeding form              |
| AUT140             | 48.32, 15.73                         | 2015                 | AUT                        | <i>Vitis</i> spp. interspecific rootstock | Leaf-feeding form              |
| AUT141             | 48.32, 15.73                         | 2015                 | AUT                        | <i>Vitis</i> spp. interspecific rootstock | Leaf-feeding form              |
| AUT142             | 48.32, 15.73                         | 2015                 | AUT                        | <i>Vitis</i> spp. interspecific rootstock | Leaf-feeding form              |
| AUT143             | 48.32, 15.73                         | 2015                 | AUT                        | <i>Vitis</i> spp. interspecific rootstock | Leaf-feeding form              |
| AUT144             | 48.32, 15.73                         | 2015                 | AUT                        | <i>Vitis</i> spp. interspecific rootstock | Leaf-feeding form              |
| AUT145             | 48.51, 15.67                         | 2015                 | AUT                        | <i>Vitis</i> spp. interspecific rootstock | Leaf-feeding form              |
| AUT146             | 48.51, 15.67                         | 2015                 | AUT                        | <i>Vitis</i> spp. interspecific rootstock | Leaf-feeding form              |
| AUT147             | 48.51, 15.67                         | 2015                 | AUT                        | <i>Vitis</i> spp. interspecific rootstock | Leaf-feeding form              |
| AUT148             | 48.51, 15.67                         | 2015                 | AUT                        | <i>Vitis</i> spp. interspecific rootstock | Leaf-feeding form              |
| AUT149             | 48.51, 15.67                         | 2015                 | AUT                        | <i>Vitis</i> spp. interspecific rootstock | Leaf-feeding form              |
| AUT150             | 48.51, 15.67                         | 2015                 | AUT                        | <i>Vitis</i> spp. interspecific rootstock | Leaf-feeding form              |
| AUT151             | 48.51, 15.67                         | 2015                 | AUT                        | <i>Vitis</i> spp. interspecific rootstock | Leaf-feeding form              |
| AUT152             | 48.49, 15.68                         | 2015                 | AUT                        | <i>Vitis</i> spp. interspecific rootstock | Leaf-feeding form              |
| AUT153             | 48.49, 15.68                         | 2015                 | AUT                        | <i>Vitis</i> spp. interspecific rootstock | Leaf-feeding form              |
| AUT154             | 48.49, 15.68                         | 2015                 | AUT                        | <i>Vitis</i> spp. interspecific rootstock | Leaf-feeding form              |
| AUT155             | 48.49, 15.68                         | 2015                 | AUT                        | <i>Vitis</i> spp. interspecific rootstock | Leaf-feeding form              |
| AUT156             | 48.49, 15.68                         | 2015                 | AUT                        | <i>Vitis</i> spp. interspecific rootstock | Leaf-feeding form              |
| AUT157             | 48.49, 15.68                         | 2015                 | AUT                        | <i>Vitis</i> spp. interspecific rootstock | Leaf-feeding form              |
| AUT158             | 48.49, 15.68                         | 2015                 | AUT                        | <i>Vitis</i> spp. interspecific rootstock | Leaf-feeding form              |
| AUT159             | 48.49, 15.68                         | 2015                 | AUT                        | <i>Vitis</i> spp. interspecific rootstock | Leaf-feeding form              |
| AUT160             | 48.49, 15.68                         | 2015                 | AUT                        | <i>Vitis</i> spp. interspecific rootstock | Leaf-feeding form              |

| <b>Sample code</b> | <b>Sampling location (lat, long)</b> | <b>Sampling year</b> | <b>Country<sup>1</sup></b> | <b>Host plant</b>                         | <b>Phylloxera feeding form</b> |
|--------------------|--------------------------------------|----------------------|----------------------------|-------------------------------------------|--------------------------------|
| AUT161             | 48.49, 15.68                         | 2015                 | AUT                        | <i>Vitis</i> spp. interspecific rootstock | Leaf-feeding form              |
| AUT162             | 48.49, 15.68                         | 2015                 | AUT                        | <i>Vitis</i> spp. interspecific rootstock | Leaf-feeding form              |
| AUT163             | 48.49, 15.68                         | 2015                 | AUT                        | <i>Vitis</i> spp. interspecific rootstock | Leaf-feeding form              |
| AUT164             | 48.49, 15.68                         | 2015                 | AUT                        | <i>Vitis</i> spp. interspecific rootstock | Leaf-feeding form              |
| AUT165             | 48.49, 15.68                         | 2015                 | AUT                        | <i>Vitis</i> spp. interspecific rootstock | Leaf-feeding form              |
| AUT166             | 48.49, 15.68                         | 2015                 | AUT                        | <i>Vitis</i> spp. interspecific rootstock | Leaf-feeding form              |
| AUT167             | 48.49, 15.68                         | 2015                 | AUT                        | <i>Vitis</i> spp. interspecific rootstock | Leaf-feeding form              |
| AUT168             | 48.49, 15.68                         | 2015                 | AUT                        | <i>Vitis</i> spp. interspecific rootstock | Leaf-feeding form              |
| AUT169             | 48.49, 15.68                         | 2015                 | AUT                        | <i>Vitis</i> spp. interspecific rootstock | Leaf-feeding form              |
| AUT170             | 48.49, 15.68                         | 2015                 | AUT                        | <i>Vitis</i> spp. interspecific rootstock | Leaf-feeding form              |
| AUT171             | 48.49, 15.68                         | 2015                 | AUT                        | <i>Vitis</i> spp. interspecific rootstock | Leaf-feeding form              |
| AUT172             | 48.49, 15.68                         | 2015                 | AUT                        | <i>Vitis</i> spp. interspecific rootstock | Leaf-feeding form              |
| AUT173             | 48.49, 15.68                         | 2015                 | AUT                        | <i>Vitis</i> spp. interspecific rootstock | Leaf-feeding form              |
| AUT174             | 48.49, 15.68                         | 2015                 | AUT                        | <i>Vitis</i> spp. interspecific rootstock | Leaf-feeding form              |
| AUT175             | 48.49, 15.68                         | 2015                 | AUT                        | <i>Vitis</i> spp. interspecific rootstock | Leaf-feeding form              |
| AUT176             | 48.49, 15.68                         | 2015                 | AUT                        | <i>Vitis</i> spp. interspecific rootstock | Leaf-feeding form              |
| AUT177             | 48.49, 15.68                         | 2015                 | AUT                        | <i>Vitis</i> spp. interspecific rootstock | Leaf-feeding form              |
| AUT178             | 48.49, 15.68                         | 2015                 | AUT                        | <i>Vitis</i> spp. interspecific rootstock | Leaf-feeding form              |
| AUT179             | 48.49, 15.68                         | 2015                 | AUT                        | <i>Vitis</i> spp. interspecific rootstock | Leaf-feeding form              |
| AUT180             | 48.49, 15.68                         | 2015                 | AUT                        | <i>Vitis</i> spp. interspecific rootstock | Leaf-feeding form              |
| AUT181             | 48.49, 15.68                         | 2015                 | AUT                        | <i>Vitis</i> spp. interspecific rootstock | Leaf-feeding form              |
| AUT182             | 48.49, 15.68                         | 2015                 | AUT                        | <i>Vitis</i> spp. interspecific rootstock | Leaf-feeding form              |
| AUT183             | 48.49, 15.68                         | 2015                 | AUT                        | <i>Vitis</i> spp. interspecific rootstock | Leaf-feeding form              |
| AUT184             | 48.49, 15.68                         | 2015                 | AUT                        | <i>Vitis</i> spp. interspecific rootstock | Leaf-feeding form              |
| AUT185             | 48.49, 15.68                         | 2015                 | AUT                        | <i>Vitis</i> spp. interspecific rootstock | Leaf-feeding form              |
| AUT186             | 48.49, 15.68                         | 2015                 | AUT                        | <i>Vitis</i> spp. interspecific rootstock | Leaf-feeding form              |
| AUT187             | 48.49, 15.68                         | 2015                 | AUT                        | <i>Vitis</i> spp. interspecific rootstock | Leaf-feeding form              |

| <b>Sample code</b> | <b>Sampling location (lat, long)</b> | <b>Sampling year</b> | <b>Country<sup>1</sup></b> | <b>Host plant</b>                         | <b>Phylloxera feeding form</b> |
|--------------------|--------------------------------------|----------------------|----------------------------|-------------------------------------------|--------------------------------|
| AUT188             | 48.49, 15.68                         | 2015                 | AUT                        | <i>Vitis</i> spp. interspecific rootstock | Leaf-feeding form              |
| AUT189             | 48.49, 15.68                         | 2015                 | AUT                        | <i>Vitis</i> spp. interspecific rootstock | Leaf-feeding form              |
| AUT190             | 48.49, 15.68                         | 2015                 | AUT                        | <i>Vitis</i> spp. interspecific rootstock | Leaf-feeding form              |
| AUT191             | 48.49, 15.68                         | 2015                 | AUT                        | <i>Vitis</i> spp. interspecific rootstock | Leaf-feeding form              |
| AUT192             | 48.49, 15.68                         | 2015                 | AUT                        | <i>Vitis</i> spp. interspecific rootstock | Leaf-feeding form              |
| AUT193             | 48.49, 15.68                         | 2015                 | AUT                        | <i>Vitis</i> spp. interspecific rootstock | Leaf-feeding form              |
| AUT194             | 48.49, 15.68                         | 2015                 | AUT                        | <i>Vitis</i> spp. interspecific rootstock | Leaf-feeding form              |
| AUT195             | 48.49, 15.68                         | 2015                 | AUT                        | <i>Vitis</i> spp. interspecific rootstock | Leaf-feeding form              |
| AUT196             | 48.49, 15.68                         | 2015                 | AUT                        | <i>Vitis</i> spp. interspecific rootstock | Leaf-feeding form              |
| AUT197             | 48.42, 15.62                         | 2015                 | AUT                        | <i>Vitis</i> spp. interspecific rootstock | Leaf-feeding form              |
| AUT198             | 48.42, 15.62                         | 2015                 | AUT                        | <i>Vitis</i> spp. interspecific rootstock | Leaf-feeding form              |
| AUT199             | 48.42, 15.62                         | 2015                 | AUT                        | <i>Vitis</i> spp. interspecific rootstock | Leaf-feeding form              |
| AUT200             | 48.42, 15.62                         | 2015                 | AUT                        | <i>Vitis</i> spp. interspecific rootstock | Leaf-feeding form              |
| AUT201             | 48.42, 15.62                         | 2015                 | AUT                        | <i>Vitis</i> spp. interspecific rootstock | Leaf-feeding form              |
| AUT202             | 48.42, 15.62                         | 2015                 | AUT                        | <i>Vitis</i> spp. interspecific rootstock | Leaf-feeding form              |
| AUT203             | 48.42, 15.62                         | 2015                 | AUT                        | <i>Vitis</i> spp. interspecific rootstock | Leaf-feeding form              |
| AUT204             | 48.35, 15.7                          | 2015                 | AUT                        | <i>Vitis</i> spp. interspecific rootstock | Leaf-feeding form              |
| AUT205             | 48.35, 15.7                          | 2015                 | AUT                        | <i>Vitis</i> spp. interspecific rootstock | Leaf-feeding form              |
| AUT206             | 48.35, 15.7                          | 2015                 | AUT                        | <i>Vitis</i> spp. interspecific rootstock | Leaf-feeding form              |
| AUT207             | 48.35, 15.7                          | 2015                 | AUT                        | <i>Vitis</i> spp. interspecific rootstock | Leaf-feeding form              |
| AUT208             | 48.35, 15.7                          | 2015                 | AUT                        | <i>Vitis</i> spp. interspecific rootstock | Leaf-feeding form              |
| AUT209             | 48.35, 15.7                          | 2015                 | AUT                        | <i>Vitis</i> spp. interspecific rootstock | Leaf-feeding form              |
| AUT210             | 48.35, 15.7                          | 2015                 | AUT                        | <i>Vitis</i> spp. interspecific rootstock | Leaf-feeding form              |
| AUT211             | 48.35, 15.69                         | 2015                 | AUT                        | <i>Vitis</i> spp. interspecific rootstock | Leaf-feeding form              |
| AUT212             | 48.35, 15.69                         | 2015                 | AUT                        | <i>Vitis</i> spp. interspecific rootstock | Leaf-feeding form              |
| AUT213             | 48.35, 15.69                         | 2015                 | AUT                        | <i>Vitis</i> spp. interspecific rootstock | Leaf-feeding form              |
| AUT214             | 48.35, 15.69                         | 2015                 | AUT                        | <i>Vitis</i> spp. interspecific rootstock | Leaf-feeding form              |

| <b>Sample code</b> | <b>Sampling location (lat, long)</b> | <b>Sampling year</b> | <b>Country<sup>1</sup></b> | <b>Host plant</b>                         | <b>Phylloxera feeding form</b> |
|--------------------|--------------------------------------|----------------------|----------------------------|-------------------------------------------|--------------------------------|
| AUT215             | 48.35, 15.69                         | 2015                 | AUT                        | <i>Vitis</i> spp. interspecific rootstock | Leaf-feeding form              |
| AUT216             | 48.35, 15.69                         | 2015                 | AUT                        | <i>Vitis</i> spp. interspecific rootstock | Leaf-feeding form              |
| AUT217             | 48.35, 15.69                         | 2015                 | AUT                        | <i>Vitis</i> spp. interspecific rootstock | Leaf-feeding form              |
| AUT218             | 48.35, 15.69                         | 2015                 | AUT                        | <i>Vitis</i> spp. interspecific rootstock | Leaf-feeding form              |
| AUT219             | 48.35, 15.69                         | 2015                 | AUT                        | <i>Vitis</i> spp. interspecific rootstock | Leaf-feeding form              |
| AUT220             | 48.35, 15.69                         | 2015                 | AUT                        | <i>Vitis</i> spp. interspecific rootstock | Leaf-feeding form              |
| AUT221             | 48.35, 15.69                         | 2015                 | AUT                        | <i>Vitis</i> spp. interspecific rootstock | Leaf-feeding form              |
| AUT222             | 48.35, 15.69                         | 2015                 | AUT                        | <i>Vitis</i> spp. interspecific rootstock | Leaf-feeding form              |
| AUT223             | 48.35, 15.69                         | 2015                 | AUT                        | <i>Vitis</i> spp. interspecific rootstock | Leaf-feeding form              |
| AUT224             | 48.35, 15.69                         | 2015                 | AUT                        | <i>Vitis</i> spp. interspecific rootstock | Leaf-feeding form              |
| AUT225             | 48.35, 15.69                         | 2015                 | AUT                        | <i>Vitis</i> spp. interspecific rootstock | Leaf-feeding form              |
| AUT226             | 48.35, 15.69                         | 2015                 | AUT                        | <i>Vitis</i> spp. interspecific rootstock | Leaf-feeding form              |
| AUT227             | 48.35, 15.69                         | 2015                 | AUT                        | <i>Vitis</i> spp. interspecific rootstock | Leaf-feeding form              |
| AUT228             | 48.35, 15.69                         | 2015                 | AUT                        | <i>Vitis</i> spp. interspecific rootstock | Leaf-feeding form              |
| AUT229             | 48.35, 15.69                         | 2015                 | AUT                        | <i>Vitis</i> spp. interspecific rootstock | Leaf-feeding form              |
| AUT230             | 48.35, 15.69                         | 2015                 | AUT                        | <i>Vitis</i> spp. interspecific rootstock | Leaf-feeding form              |
| AUT231             | 48.35, 15.69                         | 2015                 | AUT                        | <i>Vitis</i> spp. interspecific rootstock | Leaf-feeding form              |
| AUT232             | 48.35, 15.69                         | 2015                 | AUT                        | <i>Vitis</i> spp. interspecific rootstock | Leaf-feeding form              |
| AUT233             | 48.35, 15.69                         | 2015                 | AUT                        | <i>Vitis</i> spp. interspecific rootstock | Leaf-feeding form              |
| AUT234             | 48.35, 15.69                         | 2015                 | AUT                        | <i>Vitis</i> spp. interspecific rootstock | Leaf-feeding form              |
| AUT235             | 48.35, 15.69                         | 2015                 | AUT                        | <i>Vitis</i> spp. interspecific rootstock | Leaf-feeding form              |
| AUT236             | 48.35, 15.69                         | 2015                 | AUT                        | <i>Vitis</i> spp. interspecific rootstock | Leaf-feeding form              |
| AUT237             | 48.35, 15.69                         | 2015                 | AUT                        | <i>Vitis</i> spp. interspecific rootstock | Leaf-feeding form              |
| AUT238             | 48.35, 15.69                         | 2015                 | AUT                        | <i>Vitis</i> spp. interspecific rootstock | Leaf-feeding form              |
| AUT239             | 48.35, 15.69                         | 2015                 | AUT                        | <i>Vitis</i> spp. interspecific rootstock | Leaf-feeding form              |
| AUT240             | 48.35, 15.69                         | 2015                 | AUT                        | <i>Vitis</i> spp. interspecific rootstock | Leaf-feeding form              |
| AUT241             | 48.35, 15.69                         | 2015                 | AUT                        | <i>Vitis</i> spp. interspecific rootstock | Leaf-feeding form              |

| <b>Sample code</b> | <b>Sampling location (lat, long)</b> | <b>Sampling year</b> | <b>Country<sup>1</sup></b> | <b>Host plant</b>                         | <b>Phylloxera feeding form</b> |
|--------------------|--------------------------------------|----------------------|----------------------------|-------------------------------------------|--------------------------------|
| AUT242             | 48.35, 15.69                         | 2015                 | AUT                        | <i>Vitis</i> spp. interspecific rootstock | Leaf-feeding form              |
| AUT243             | 48.35, 15.69                         | 2015                 | AUT                        | <i>Vitis</i> spp. interspecific rootstock | Leaf-feeding form              |
| AUT244             | 48.35, 15.69                         | 2015                 | AUT                        | <i>Vitis</i> spp. interspecific rootstock | Leaf-feeding form              |
| AUT245             | 48.35, 15.69                         | 2015                 | AUT                        | <i>Vitis</i> spp. interspecific rootstock | Leaf-feeding form              |
| AUT246             | 48.35, 15.69                         | 2015                 | AUT                        | <i>Vitis</i> spp. interspecific rootstock | Leaf-feeding form              |
| AUT247             | 48.35, 15.69                         | 2015                 | AUT                        | <i>Vitis</i> spp. interspecific rootstock | Leaf-feeding form              |
| AUT248             | 48.35, 15.69                         | 2015                 | AUT                        | <i>Vitis</i> spp. interspecific rootstock | Leaf-feeding form              |
| AUT249             | 48.35, 15.69                         | 2015                 | AUT                        | <i>Vitis</i> spp. interspecific rootstock | Leaf-feeding form              |
| AUT250             | 48.35, 15.69                         | 2015                 | AUT                        | <i>Vitis</i> spp. interspecific rootstock | Leaf-feeding form              |
| AUT251             | 48.35, 15.69                         | 2015                 | AUT                        | <i>Vitis</i> spp. interspecific rootstock | Leaf-feeding form              |
| AUT252             | 48.35, 15.69                         | 2015                 | AUT                        | <i>Vitis</i> spp. interspecific rootstock | Leaf-feeding form              |
| AUT253             | 48.35, 15.69                         | 2015                 | AUT                        | <i>Vitis</i> spp. interspecific rootstock | Leaf-feeding form              |
| AUT254             | 48.51, 16.24                         | 2015                 | AUT                        | <i>Vitis</i> spp. interspecific rootstock | Leaf-feeding form              |
| AUT255             | 48.51, 16.24                         | 2015                 | AUT                        | <i>Vitis</i> spp. interspecific rootstock | Leaf-feeding form              |
| AUT256             | 48.51, 16.24                         | 2015                 | AUT                        | <i>Vitis</i> spp. interspecific rootstock | Leaf-feeding form              |
| AUT257             | 48.51, 16.24                         | 2015                 | AUT                        | <i>Vitis</i> spp. interspecific rootstock | Leaf-feeding form              |
| AUT258             | 48.51, 16.24                         | 2015                 | AUT                        | <i>Vitis</i> spp. interspecific rootstock | Leaf-feeding form              |
| AUT259             | 48.51, 16.24                         | 2015                 | AUT                        | <i>Vitis</i> spp. interspecific rootstock | Leaf-feeding form              |
| AUT260             | 48.51, 16.24                         | 2015                 | AUT                        | <i>Vitis</i> spp. interspecific rootstock | Leaf-feeding form              |
| AUT261             | 48.51, 16.24                         | 2015                 | AUT                        | <i>Vitis</i> spp. interspecific rootstock | Leaf-feeding form              |
| AUT262             | 48.51, 16.24                         | 2015                 | AUT                        | <i>Vitis</i> spp. interspecific rootstock | Leaf-feeding form              |
| AUT263             | 48.51, 16.24                         | 2015                 | AUT                        | <i>Vitis</i> spp. interspecific rootstock | Leaf-feeding form              |
| AUT264             | 48.68, 16.62                         | 2015                 | AUT                        | <i>Vitis</i> spp. interspecific rootstock | Leaf-feeding form              |
| AUT265             | 48.68, 16.62                         | 2015                 | AUT                        | <i>Vitis</i> spp. interspecific rootstock | Leaf-feeding form              |
| AUT266             | 48.68, 16.62                         | 2015                 | AUT                        | <i>Vitis</i> spp. interspecific rootstock | Leaf-feeding form              |
| AUT267             | 48.68, 16.62                         | 2015                 | AUT                        | <i>Vitis</i> spp. interspecific rootstock | Leaf-feeding form              |
| AUT268             | 48.68, 16.62                         | 2015                 | AUT                        | <i>Vitis</i> spp. interspecific rootstock | Leaf-feeding form              |

| <b>Sample code</b> | <b>Sampling location (lat, long)</b> | <b>Sampling year</b> | <b>Country<sup>1</sup></b> | <b>Host plant</b>                         | <b>Phylloxera feeding form</b> |
|--------------------|--------------------------------------|----------------------|----------------------------|-------------------------------------------|--------------------------------|
| AUT269             | 48.68, 16.62                         | 2015                 | AUT                        | <i>Vitis</i> spp. interspecific rootstock | Leaf-feeding form              |
| AUT270             | 48.68, 16.62                         | 2015                 | AUT                        | <i>Vitis</i> spp. interspecific rootstock | Leaf-feeding form              |
| AUT271             | 48.68, 16.62                         | 2015                 | AUT                        | <i>Vitis</i> spp. interspecific rootstock | Leaf-feeding form              |
| AUT272             | 48.68, 16.62                         | 2015                 | AUT                        | <i>Vitis</i> spp. interspecific rootstock | Leaf-feeding form              |
| AUT273             | 48.68, 16.62                         | 2015                 | AUT                        | <i>Vitis</i> spp. interspecific rootstock | Leaf-feeding form              |
| AUT274             | 48.68, 16.62                         | 2015                 | AUT                        | <i>Vitis</i> spp. interspecific rootstock | Leaf-feeding form              |
| AUT275             | 48.68, 16.62                         | 2015                 | AUT                        | <i>Vitis</i> spp. interspecific rootstock | Leaf-feeding form              |
| AUT276             | 48.68, 16.62                         | 2015                 | AUT                        | <i>Vitis</i> spp. interspecific rootstock | Leaf-feeding form              |
| AUT277             | 48.68, 16.62                         | 2015                 | AUT                        | <i>Vitis</i> spp. interspecific rootstock | Leaf-feeding form              |
| AUT278             | 48.68, 16.62                         | 2015                 | AUT                        | <i>Vitis</i> spp. interspecific rootstock | Leaf-feeding form              |
| AUT279             | 48.68, 16.62                         | 2015                 | AUT                        | <i>Vitis</i> spp. interspecific rootstock | Leaf-feeding form              |
| AUT280             | 48.68, 16.62                         | 2015                 | AUT                        | <i>Vitis</i> spp. interspecific rootstock | Leaf-feeding form              |
| AUT281             | 48.68, 16.62                         | 2015                 | AUT                        | <i>Vitis</i> spp. interspecific rootstock | Leaf-feeding form              |
| AUT282             | 48.68, 16.62                         | 2015                 | AUT                        | <i>Vitis</i> spp. interspecific rootstock | Leaf-feeding form              |
| AUT283             | 48.68, 16.62                         | 2015                 | AUT                        | <i>Vitis</i> spp. interspecific rootstock | Leaf-feeding form              |
| AUT284             | 48.68, 16.62                         | 2015                 | AUT                        | <i>Vitis</i> spp. interspecific rootstock | Leaf-feeding form              |
| AUT285             | 48.68, 16.62                         | 2015                 | AUT                        | <i>Vitis</i> spp. interspecific rootstock | Leaf-feeding form              |
| AUT286             | 48.68, 16.62                         | 2015                 | AUT                        | <i>Vitis</i> spp. interspecific rootstock | Leaf-feeding form              |
| AUT287             | 48.68, 16.62                         | 2015                 | AUT                        | <i>Vitis</i> spp. interspecific rootstock | Leaf-feeding form              |
| AUT288             | 48.68, 16.62                         | 2015                 | AUT                        | <i>Vitis</i> spp. interspecific rootstock | Leaf-feeding form              |
| AUT289             | 48.68, 16.62                         | 2015                 | AUT                        | <i>Vitis</i> spp. interspecific rootstock | Leaf-feeding form              |
| AUT290             | 48.68, 16.62                         | 2015                 | AUT                        | <i>Vitis</i> spp. interspecific rootstock | Leaf-feeding form              |
| AUT291             | 48.68, 16.62                         | 2015                 | AUT                        | <i>Vitis</i> spp. interspecific rootstock | Leaf-feeding form              |
| AUT292             | 48.68, 16.62                         | 2015                 | AUT                        | <i>Vitis</i> spp. interspecific rootstock | Leaf-feeding form              |
| AUT293             | 48.68, 16.62                         | 2015                 | AUT                        | <i>Vitis</i> spp. interspecific rootstock | Leaf-feeding form              |
| AUT294             | 48.68, 16.62                         | 2015                 | AUT                        | <i>Vitis</i> spp. interspecific rootstock | Leaf-feeding form              |
| AUT295             | 48.68, 16.62                         | 2015                 | AUT                        | <i>Vitis</i> spp. interspecific rootstock | Leaf-feeding form              |

| <b>Sample code</b> | <b>Sampling location (lat, long)</b> | <b>Sampling year</b> | <b>Country<sup>1</sup></b> | <b>Host plant</b>                         | <b>Phylloxera feeding form</b> |
|--------------------|--------------------------------------|----------------------|----------------------------|-------------------------------------------|--------------------------------|
| AUT296             | 48.68, 16.62                         | 2015                 | AUT                        | <i>Vitis</i> spp. interspecific rootstock | Leaf-feeding form              |
| AUT297             | 48.68, 16.62                         | 2015                 | AUT                        | <i>Vitis</i> spp. interspecific rootstock | Leaf-feeding form              |
| AUT298             | 48.68, 16.62                         | 2015                 | AUT                        | <i>Vitis</i> spp. interspecific rootstock | Leaf-feeding form              |
| AUT299             | 48.68, 16.62                         | 2015                 | AUT                        | <i>Vitis</i> spp. interspecific rootstock | Leaf-feeding form              |
| AUT300             | 48.68, 16.62                         | 2015                 | AUT                        | <i>Vitis</i> spp. interspecific rootstock | Leaf-feeding form              |
| AUT301             | 48.68, 16.62                         | 2015                 | AUT                        | <i>Vitis</i> spp. interspecific rootstock | Leaf-feeding form              |
| AUT302             | 48.68, 16.62                         | 2015                 | AUT                        | <i>Vitis</i> spp. interspecific rootstock | Leaf-feeding form              |
| AUT303             | 48.68, 16.62                         | 2015                 | AUT                        | <i>Vitis</i> spp. interspecific rootstock | Leaf-feeding form              |
| AUT304             | 48.68, 16.62                         | 2015                 | AUT                        | <i>Vitis</i> spp. interspecific rootstock | Leaf-feeding form              |
| AUT305             | 48.68, 16.62                         | 2015                 | AUT                        | <i>Vitis</i> spp. interspecific rootstock | Leaf-feeding form              |
| AUT306             | 48.68, 16.62                         | 2015                 | AUT                        | <i>Vitis</i> spp. interspecific rootstock | Leaf-feeding form              |
| AUT307             | 48.68, 16.62                         | 2015                 | AUT                        | <i>Vitis</i> spp. interspecific rootstock | Leaf-feeding form              |
| AUT308             | 48.68, 16.62                         | 2015                 | AUT                        | <i>Vitis</i> spp. interspecific rootstock | Leaf-feeding form              |
| AUT309             | 48.7, 16.71                          | 2015                 | AUT                        | <i>Vitis</i> spp. interspecific rootstock | Leaf-feeding form              |
| AUT310             | 48.7, 16.71                          | 2015                 | AUT                        | <i>Vitis</i> spp. interspecific rootstock | Leaf-feeding form              |
| AUT311             | 48.7, 16.71                          | 2015                 | AUT                        | <i>Vitis</i> spp. interspecific rootstock | Leaf-feeding form              |
| AUT312             | 48.7, 16.71                          | 2015                 | AUT                        | <i>Vitis</i> spp. interspecific rootstock | Leaf-feeding form              |
| AUT313             | 48.7, 16.71                          | 2015                 | AUT                        | <i>Vitis</i> spp. interspecific rootstock | Leaf-feeding form              |
| AUT314             | 48.7, 16.71                          | 2015                 | AUT                        | <i>Vitis</i> spp. interspecific rootstock | Leaf-feeding form              |
| AUT315             | 48.7, 16.71                          | 2015                 | AUT                        | <i>Vitis</i> spp. interspecific rootstock | Leaf-feeding form              |
| AUT316             | 48.7, 16.71                          | 2015                 | AUT                        | <i>Vitis</i> spp. interspecific rootstock | Leaf-feeding form              |
| AUT317             | 48.7, 16.71                          | 2015                 | AUT                        | <i>Vitis</i> spp. interspecific rootstock | Leaf-feeding form              |
| AUT318             | 48.7, 16.71                          | 2015                 | AUT                        | <i>Vitis</i> spp. interspecific rootstock | Leaf-feeding form              |
| AUT319             | 48.7, 16.71                          | 2015                 | AUT                        | <i>Vitis</i> spp. interspecific rootstock | Leaf-feeding form              |
| AUT320             | 48.7, 16.71                          | 2015                 | AUT                        | <i>Vitis</i> spp. interspecific rootstock | Leaf-feeding form              |
| AUT321             | 48.7, 16.71                          | 2015                 | AUT                        | <i>Vitis</i> spp. interspecific rootstock | Leaf-feeding form              |
| AUT322             | 48.7, 16.71                          | 2015                 | AUT                        | <i>Vitis</i> spp. interspecific rootstock | Leaf-feeding form              |

| Sample code | Sampling location (lat, long) | Sampling year | Country <sup>1</sup> | Host plant                                | Phylloxera feeding form |
|-------------|-------------------------------|---------------|----------------------|-------------------------------------------|-------------------------|
| AUT323      | 48.7, 16.71                   | 2015          | AUT                  | <i>Vitis</i> spp. interspecific rootstock | Leaf-feeding form       |
| AUT324      | 48.7, 16.71                   | 2015          | AUT                  | <i>Vitis</i> spp. interspecific rootstock | Leaf-feeding form       |
| AUT325      | 48.7, 16.71                   | 2015          | AUT                  | <i>Vitis</i> spp. interspecific rootstock | Leaf-feeding form       |
| AUT326      | 48.7, 16.71                   | 2015          | AUT                  | <i>Vitis</i> spp. interspecific rootstock | Leaf-feeding form       |
| AUT327      | 48.7, 16.71                   | 2015          | AUT                  | <i>Vitis</i> spp. interspecific rootstock | Leaf-feeding form       |
| AUT328      | 48.7, 16.71                   | 2015          | AUT                  | <i>Vitis</i> spp. interspecific rootstock | Leaf-feeding form       |
| AUT329      | 48.7, 16.71                   | 2015          | AUT                  | <i>Vitis</i> spp. interspecific rootstock | Leaf-feeding form       |
| AUT330      | 48.7, 16.71                   | 2015          | AUT                  | <i>Vitis</i> spp. interspecific rootstock | Leaf-feeding form       |
| AUT331      | 48.7, 16.71                   | 2015          | AUT                  | <i>Vitis</i> spp. interspecific rootstock | Leaf-feeding form       |
| AUT332      | 48.7, 16.71                   | 2015          | AUT                  | <i>Vitis</i> spp. interspecific rootstock | Leaf-feeding form       |
| AUT333      | 48.7, 16.71                   | 2015          | AUT                  | <i>Vitis</i> spp. interspecific rootstock | Leaf-feeding form       |
| AUT334      | 48.7, 16.71                   | 2015          | AUT                  | <i>Vitis</i> spp. interspecific rootstock | Leaf-feeding form       |
| AUT335      | 48.7, 16.71                   | 2015          | AUT                  | <i>Vitis</i> spp. interspecific rootstock | Leaf-feeding form       |
| AUT336      | 48.7, 16.71                   | 2015          | AUT                  | <i>Vitis</i> spp. interspecific rootstock | Leaf-feeding form       |
| AUT337      | 48.7, 16.71                   | 2015          | AUT                  | <i>Vitis</i> spp. interspecific rootstock | Leaf-feeding form       |
| AUT338      | 48.7, 16.71                   | 2015          | AUT                  | <i>Vitis</i> spp. interspecific rootstock | Leaf-feeding form       |
| AUT339      | 48.7, 16.71                   | 2015          | AUT                  | <i>Vitis</i> spp. interspecific rootstock | Leaf-feeding form       |
| AUT340      | 48.7, 16.71                   | 2015          | AUT                  | <i>Vitis</i> spp. interspecific rootstock | Leaf-feeding form       |
| AUT341      | 48.7, 16.71                   | 2015          | AUT                  | <i>Vitis</i> spp. interspecific rootstock | Leaf-feeding form       |
| AUT342      | 48.7, 16.71                   | 2015          | AUT                  | <i>Vitis</i> spp. interspecific rootstock | Leaf-feeding form       |
| AUT343      | 48.7, 16.71                   | 2015          | AUT                  | <i>Vitis</i> spp. interspecific rootstock | Leaf-feeding form       |
| AUT344      | 48.7, 16.71                   | 2015          | AUT                  | <i>Vitis</i> spp. interspecific rootstock | Leaf-feeding form       |
| AUT345      | 48.7, 16.71                   | 2015          | AUT                  | <i>Vitis</i> spp. interspecific rootstock | Leaf-feeding form       |
| AUT346      | 48.7, 16.71                   | 2015          | AUT                  | <i>Vitis</i> spp. interspecific rootstock | Leaf-feeding form       |
| AUT347      | 48.64, 16.64                  | 2015          | AUT                  | <i>Vitis</i> spp. interspecific rootstock | Leaf-feeding form       |
| AUT348      | 48.64, 16.64                  | 2015          | AUT                  | <i>Vitis</i> spp. interspecific rootstock | Leaf-feeding form       |
| AUT349      | 48.64, 16.64                  | 2015          | AUT                  | <i>Vitis</i> spp. interspecific rootstock | Leaf-feeding form       |



| <b>Sample code</b> | <b>Sampling location (lat, long)</b> | <b>Sampling year</b> | <b>Country<sup>1</sup></b> | <b>Host plant</b>                         | <b>Phylloxera feeding form</b> |
|--------------------|--------------------------------------|----------------------|----------------------------|-------------------------------------------|--------------------------------|
| AUT350             | 48.64, 16.64                         | 2015                 | AUT                        | <i>Vitis</i> spp. interspecific rootstock | Leaf-feeding form              |
| AUT351             | 48.64, 16.64                         | 2015                 | AUT                        | <i>Vitis</i> spp. interspecific rootstock | Leaf-feeding form              |
| AUT352             | 48.64, 16.64                         | 2015                 | AUT                        | <i>Vitis</i> spp. interspecific rootstock | Leaf-feeding form              |
| AUT353             | 48.64, 16.64                         | 2015                 | AUT                        | <i>Vitis</i> spp. interspecific rootstock | Leaf-feeding form              |
| AUT354             | 48.64, 16.64                         | 2015                 | AUT                        | <i>Vitis</i> spp. interspecific rootstock | Leaf-feeding form              |
| AUT355             | 48.64, 16.64                         | 2015                 | AUT                        | <i>Vitis</i> spp. interspecific rootstock | Leaf-feeding form              |
| AUT356             | 48.64, 16.64                         | 2015                 | AUT                        | <i>Vitis</i> spp. interspecific rootstock | Leaf-feeding form              |
| AUT357             | 48.64, 16.64                         | 2015                 | AUT                        | <i>Vitis</i> spp. interspecific rootstock | Leaf-feeding form              |
| AUT358             | 48.64, 16.64                         | 2015                 | AUT                        | <i>Vitis</i> spp. interspecific rootstock | Leaf-feeding form              |
| AUT359             | 48.64, 16.64                         | 2015                 | AUT                        | <i>Vitis</i> spp. interspecific rootstock | Leaf-feeding form              |
| AUT360             | 48.64, 16.64                         | 2015                 | AUT                        | <i>Vitis</i> spp. interspecific rootstock | Leaf-feeding form              |
| AUT361             | 48.64, 16.64                         | 2015                 | AUT                        | <i>Vitis</i> spp. interspecific rootstock | Leaf-feeding form              |
| AUT362             | 48.64, 16.64                         | 2015                 | AUT                        | <i>Vitis</i> spp. interspecific rootstock | Leaf-feeding form              |
| AUT363             | 48.64, 16.64                         | 2015                 | AUT                        | <i>Vitis</i> spp. interspecific rootstock | Leaf-feeding form              |
| AUT364             | 48.64, 16.64                         | 2015                 | AUT                        | <i>Vitis</i> spp. interspecific rootstock | Leaf-feeding form              |
| AUT365             | 48.64, 16.64                         | 2015                 | AUT                        | <i>Vitis</i> spp. interspecific rootstock | Leaf-feeding form              |
| AUT366             | 48.64, 16.64                         | 2015                 | AUT                        | <i>Vitis</i> spp. interspecific rootstock | Leaf-feeding form              |
| AUT367             | 48.64, 16.64                         | 2015                 | AUT                        | <i>Vitis</i> spp. interspecific rootstock | Leaf-feeding form              |
| AUT368             | 48.64, 16.64                         | 2015                 | AUT                        | <i>Vitis</i> spp. interspecific rootstock | Leaf-feeding form              |
| AUT369             | 48.63, 16.65                         | 2015                 | AUT                        | <i>Vitis</i> spp. interspecific rootstock | Leaf-feeding form              |
| AUT370             | 48.63, 16.65                         | 2015                 | AUT                        | <i>Vitis</i> spp. interspecific rootstock | Leaf-feeding form              |
| AUT371             | 48.63, 16.65                         | 2015                 | AUT                        | <i>Vitis</i> spp. interspecific rootstock | Leaf-feeding form              |
| AUT372             | 48.63, 16.65                         | 2015                 | AUT                        | <i>Vitis</i> spp. interspecific rootstock | Leaf-feeding form              |
| AUT373             | 48.63, 16.65                         | 2015                 | AUT                        | <i>Vitis</i> spp. interspecific rootstock | Leaf-feeding form              |
| AUT374             | 48.63, 16.65                         | 2015                 | AUT                        | <i>Vitis</i> spp. interspecific rootstock | Leaf-feeding form              |
| AUT375             | 48.63, 16.65                         | 2015                 | AUT                        | <i>Vitis</i> spp. interspecific rootstock | Leaf-feeding form              |
| AUT376             | 48.63, 16.65                         | 2015                 | AUT                        | <i>Vitis</i> spp. interspecific rootstock | Leaf-feeding form              |

| Sample code | Sampling location (lat, long) | Sampling year | Country <sup>1</sup> | Host plant                                | Phylloxera feeding form |
|-------------|-------------------------------|---------------|----------------------|-------------------------------------------|-------------------------|
| AUT377      | 48.63, 16.65                  | 2015          | AUT                  | <i>Vitis</i> spp. interspecific rootstock | Leaf-feeding form       |
| AUT378      | 48.63, 16.65                  | 2015          | AUT                  | <i>Vitis</i> spp. interspecific rootstock | Leaf-feeding form       |
| AUT379      | 48.63, 16.65                  | 2015          | AUT                  | <i>Vitis</i> spp. interspecific rootstock | Leaf-feeding form       |
| AUT380      | 48.63, 16.65                  | 2015          | AUT                  | <i>Vitis</i> spp. interspecific rootstock | Leaf-feeding form       |
| AUT381      | 48.63, 16.65                  | 2015          | AUT                  | <i>Vitis</i> spp. interspecific rootstock | Leaf-feeding form       |
| AUT382      | 48.63, 16.65                  | 2015          | AUT                  | <i>Vitis</i> spp. interspecific rootstock | Leaf-feeding form       |
| AUT383      | 48.63, 16.65                  | 2015          | AUT                  | <i>Vitis</i> spp. interspecific rootstock | Leaf-feeding form       |
| AUT384      | 48.63, 16.65                  | 2015          | AUT                  | <i>Vitis</i> spp. interspecific rootstock | Leaf-feeding form       |
| AUT385      | 48.63, 16.65                  | 2015          | AUT                  | <i>Vitis</i> spp. interspecific rootstock | Leaf-feeding form       |
| AUT386      | 48.63, 16.65                  | 2015          | AUT                  | <i>Vitis</i> spp. interspecific rootstock | Leaf-feeding form       |
| AUT387      | 48.63, 16.65                  | 2015          | AUT                  | <i>Vitis</i> spp. interspecific rootstock | Leaf-feeding form       |
| AUT388      | 48.63, 16.65                  | 2015          | AUT                  | <i>Vitis</i> spp. interspecific rootstock | Leaf-feeding form       |
| AUT389      | 48.63, 16.65                  | 2015          | AUT                  | <i>Vitis</i> spp. interspecific rootstock | Leaf-feeding form       |
| AUT390      | 48.63, 16.65                  | 2015          | AUT                  | <i>Vitis</i> spp. interspecific rootstock | Leaf-feeding form       |
| AUT391      | 48.63, 16.65                  | 2015          | AUT                  | <i>Vitis</i> spp. interspecific rootstock | Leaf-feeding form       |
| DEU001      | 50.03, 8.12                   | 2018          | DEU                  | <i>Vitis vinifera</i> L. cultivar         | Leaf-feeding form       |
| DEU002      | 50.03, 8.12                   | 2018          | DEU                  | <i>Vitis vinifera</i> L. cultivar         | Leaf-feeding form       |
| DEU003      | 50.03, 8.12                   | 2018          | DEU                  | <i>Vitis vinifera</i> L. cultivar         | Leaf-feeding form       |
| DEU004      | 50.03, 8.12                   | 2018          | DEU                  | <i>Vitis vinifera</i> L. cultivar         | Leaf-feeding form       |
| DEU005      | 50.03, 8.12                   | 2018          | DEU                  | <i>Vitis vinifera</i> L. cultivar         | Leaf-feeding form       |
| DEU006      | n.a.                          | 2018          | DEU                  | <i>Vitis vinifera</i> L. cultivar         | Leaf-feeding form       |
| DEU007      | n.a.                          | 2018          | DEU                  | <i>Vitis vinifera</i> L. cultivar         | Leaf-feeding form       |
| DEU008      | n.a.                          | 2018          | DEU                  | <i>Vitis vinifera</i> L. cultivar         | Leaf-feeding form       |
| DEU009      | n.a.                          | 2018          | DEU                  | <i>Vitis vinifera</i> L. cultivar         | Leaf-feeding form       |
| DEU010      | n.a.                          | 2018          | DEU                  | <i>Vitis vinifera</i> L. cultivar         | Leaf-feeding form       |
| DEU011      | n.a.                          | 2018          | DEU                  | <i>Vitis vinifera</i> L. cultivar         | Leaf-feeding form       |
| DEU012      | 50.03, 8.12                   | 2018          | DEU                  | <i>Vitis vinifera</i> L. cultivar         | Leaf-feeding form       |

| Sample code | Sampling location (lat, long) | Sampling year | Country <sup>1</sup> | Host plant                                             | Phylloxera feeding form |
|-------------|-------------------------------|---------------|----------------------|--------------------------------------------------------|-------------------------|
| DEU013      | 50.03, 8.12                   | 2018          | DEU                  | <i>Vitis vinifera</i> L. cultivar                      | Leaf-feeding form       |
| DEU014      | 50.03, 8.12                   | 2018          | DEU                  | <i>Vitis vinifera</i> L. cultivar                      | Leaf-feeding form       |
| DEU015      | 50.03, 8.12                   | 2018          | DEU                  | <i>Vitis vinifera</i> L. cultivar                      | Leaf-feeding form       |
| DEU016      | 50.03, 8.12                   | 2018          | DEU                  | <i>Vitis vinifera</i> L. cultivar                      | Leaf-feeding form       |
| DEU017      | 50.01, 8.02                   | 2018          | DEU                  | <i>Vitis vinifera</i> L. cultivar                      | Leaf-feeding form       |
| DEU018      | 50.01, 8.02                   | 2018          | DEU                  | <i>Vitis vinifera</i> L. cultivar                      | Leaf-feeding form       |
| DEU019      | 47.95, 7.75                   | 2015          | DEU                  | <i>Vitis vinifera</i> L. cultivar                      | Leaf-feeding form       |
| DEU020      | 47.95, 7.75                   | 2015          | DEU                  | <i>Vitis vinifera</i> L. cultivar                      | Leaf-feeding form       |
| DEU021      | 47.95, 7.75                   | 2015          | DEU                  | <i>Vitis vinifera</i> L. cultivar                      | Leaf-feeding form       |
| DEU022      | 47.95, 7.75                   | 2015          | DEU                  | <i>Vitis vinifera</i> L. cultivar                      | Leaf-feeding form       |
| DEU023      | 47.95, 7.75                   | 2015          | DEU                  | <i>Vitis vinifera</i> L. cultivar                      | Leaf-feeding form       |
| DEU024      | 47.95, 7.75                   | 2015          | DEU                  | <i>Vitis vinifera</i> L. cultivar                      | Leaf-feeding form       |
| DEU025      | 47.95, 7.75                   | 2015          | DEU                  | <i>Vitis vinifera</i> L. cultivar                      | Leaf-feeding form       |
| DEU026      | 47.95, 7.75                   | 2015          | DEU                  | <i>Vitis vinifera</i> L. cultivar                      | Leaf-feeding form       |
| DEU027      | 47.95, 7.75                   | 2015          | DEU                  | <i>Vitis vinifera</i> L. cultivar                      | Leaf-feeding form       |
| DEU028      | 47.95, 7.75                   | 2015          | DEU                  | <i>Vitis vinifera</i> L. cultivar                      | Leaf-feeding form       |
| DEU029      | 47.95, 7.75                   | 2015          | DEU                  | <i>Vitis vinifera</i> L. cultivar                      | Leaf-feeding form       |
| DEU030      | 47.96, 7.77                   | 2015          | DEU                  | <i>Vitis</i> spp. interspecific hybrid direct-producer | Leaf-feeding form       |
| DEU031      | 47.96, 7.77                   | 2015          | DEU                  | <i>Vitis</i> spp. interspecific hybrid direct-producer | Leaf-feeding form       |
| DEU032      | 47.96, 7.77                   | 2015          | DEU                  | <i>Vitis</i> spp. interspecific hybrid direct-producer | Leaf-feeding form       |
| DEU033      | 47.96, 7.77                   | 2015          | DEU                  | <i>Vitis</i> spp. interspecific hybrid direct-producer | Leaf-feeding form       |
| DEU034      | 47.96, 7.77                   | 2015          | DEU                  | <i>Vitis</i> spp. interspecific hybrid direct-producer | Leaf-feeding form       |
| DEU035      | 47.96, 7.77                   | 2015          | DEU                  | <i>Vitis</i> spp. interspecific hybrid direct-producer | Leaf-feeding form       |
| DEU036      | 47.96, 7.77                   | 2015          | DEU                  | <i>Vitis</i> spp. interspecific hybrid direct-producer | Leaf-feeding form       |
| DEU037      | 47.96, 7.77                   | 2015          | DEU                  | <i>Vitis</i> spp. interspecific hybrid direct-producer | Leaf-feeding form       |
| DEU038      | 47.96, 7.77                   | 2015          | DEU                  | <i>Vitis</i> spp. interspecific hybrid direct-producer | Leaf-feeding form       |
| DEU039      | 47.96, 7.77                   | 2015          | DEU                  | <i>Vitis</i> spp. interspecific hybrid direct-producer | Leaf-feeding form       |

| Sample code | Sampling location (lat, long) | Sampling year | Country <sup>1</sup> | Host plant                                             | Phylloxera feeding form |
|-------------|-------------------------------|---------------|----------------------|--------------------------------------------------------|-------------------------|
| DEU040      | 47.96, 7.77                   | 2015          | DEU                  | <i>Vitis</i> spp. interspecific hybrid direct-producer | Leaf-feeding form       |
| DEU041      | 47.96, 7.77                   | 2015          | DEU                  | <i>Vitis</i> spp. interspecific hybrid direct-producer | Leaf-feeding form       |
| DEU042      | 47.96, 7.77                   | 2015          | DEU                  | <i>Vitis</i> spp. interspecific hybrid direct-producer | Leaf-feeding form       |
| DEU043      | 47.96, 7.77                   | 2015          | DEU                  | <i>Vitis</i> spp. interspecific hybrid direct-producer | Leaf-feeding form       |
| DEU044      | 47.96, 7.77                   | 2015          | DEU                  | <i>Vitis</i> spp. interspecific hybrid direct-producer | Leaf-feeding form       |
| DEU045      | 47.96, 7.77                   | 2015          | DEU                  | <i>Vitis</i> spp. interspecific hybrid direct-producer | Leaf-feeding form       |
| DEU046      | 47.96, 7.77                   | 2015          | DEU                  | <i>Vitis</i> spp. interspecific hybrid direct-producer | Leaf-feeding form       |
| DEU047      | 47.96, 7.77                   | 2015          | DEU                  | <i>Vitis</i> spp. interspecific hybrid direct-producer | Leaf-feeding form       |
| DEU048      | 47.96, 7.77                   | 2015          | DEU                  | <i>Vitis</i> spp. interspecific hybrid direct-producer | Leaf-feeding form       |
| DEU049      | 47.96, 7.77                   | 2015          | DEU                  | <i>Vitis</i> spp. interspecific hybrid direct-producer | Leaf-feeding form       |
| DEU050      | 47.96, 7.77                   | 2015          | DEU                  | <i>Vitis</i> spp. interspecific hybrid direct-producer | Leaf-feeding form       |
| DEU051      | 47.96, 7.77                   | 2015          | DEU                  | <i>Vitis</i> spp. interspecific hybrid direct-producer | Leaf-feeding form       |
| DEU052      | 47.96, 7.77                   | 2015          | DEU                  | <i>Vitis</i> spp. interspecific hybrid direct-producer | Leaf-feeding form       |
| DEU053      | 47.96, 7.77                   | 2015          | DEU                  | <i>Vitis</i> spp. interspecific hybrid direct-producer | Leaf-feeding form       |
| DEU054      | 47.96, 7.77                   | 2015          | DEU                  | <i>Vitis</i> spp. interspecific hybrid direct-producer | Leaf-feeding form       |
| DEU055      | 47.96, 7.77                   | 2015          | DEU                  | <i>Vitis</i> spp. interspecific hybrid direct-producer | Leaf-feeding form       |
| DEU056      | 47.96, 7.77                   | 2015          | DEU                  | <i>Vitis</i> spp. interspecific hybrid direct-producer | Leaf-feeding form       |
| DEU057      | 48.19, 7.81                   | 2015          | DEU                  | <i>Vitis</i> spp. interspecific hybrid direct-producer | Leaf-feeding form       |
| DEU058      | 48.19, 7.81                   | 2015          | DEU                  | <i>Vitis</i> spp. interspecific hybrid direct-producer | Leaf-feeding form       |
| DEU059      | 48.19, 7.81                   | 2015          | DEU                  | <i>Vitis</i> spp. interspecific hybrid direct-producer | Leaf-feeding form       |
| DEU060      | 48.19, 7.81                   | 2015          | DEU                  | <i>Vitis</i> spp. interspecific hybrid direct-producer | Leaf-feeding form       |
| DEU061      | 48.19, 7.81                   | 2015          | DEU                  | <i>Vitis</i> spp. interspecific hybrid direct-producer | Leaf-feeding form       |
| DEU062      | 48.19, 7.81                   | 2015          | DEU                  | <i>Vitis</i> spp. interspecific hybrid direct-producer | Leaf-feeding form       |
| DEU063      | 48.19, 7.81                   | 2015          | DEU                  | <i>Vitis</i> spp. interspecific hybrid direct-producer | Leaf-feeding form       |
| DEU064      | 48.19, 7.81                   | 2015          | DEU                  | <i>Vitis</i> spp. interspecific hybrid direct-producer | Leaf-feeding form       |
| DEU065      | 48.19, 7.81                   | 2015          | DEU                  | <i>Vitis</i> spp. interspecific hybrid direct-producer | Leaf-feeding form       |
| DEU066      | 48.19, 7.81                   | 2015          | DEU                  | <i>Vitis</i> spp. interspecific hybrid direct-producer | Leaf-feeding form       |

| Sample code | Sampling location (lat, long) | Sampling year | Country <sup>1</sup> | Host plant                                             | Phylloxera feeding form |
|-------------|-------------------------------|---------------|----------------------|--------------------------------------------------------|-------------------------|
| DEU067      | 48.19, 7.81                   | 2015          | DEU                  | <i>Vitis</i> spp. interspecific hybrid direct-producer | Leaf-feeding form       |
| DEU068      | 48.19, 7.81                   | 2015          | DEU                  | <i>Vitis</i> spp. interspecific hybrid direct-producer | Leaf-feeding form       |
| DEU069      | 48.19, 7.81                   | 2015          | DEU                  | <i>Vitis</i> spp. interspecific hybrid direct-producer | Leaf-feeding form       |
| DEU070      | 48.19, 7.81                   | 2015          | DEU                  | <i>Vitis</i> spp. interspecific hybrid direct-producer | Leaf-feeding form       |
| DEU071      | 48.19, 7.81                   | 2015          | DEU                  | <i>Vitis</i> spp. interspecific hybrid direct-producer | Leaf-feeding form       |
| DEU072      | 48.19, 7.81                   | 2015          | DEU                  | <i>Vitis</i> spp. interspecific hybrid direct-producer | Leaf-feeding form       |
| DEU073      | 48.19, 7.81                   | 2015          | DEU                  | <i>Vitis</i> spp. interspecific hybrid direct-producer | Leaf-feeding form       |
| DEU074      | 48.19, 7.81                   | 2015          | DEU                  | <i>Vitis</i> spp. interspecific hybrid direct-producer | Leaf-feeding form       |
| DEU075      | 48.19, 7.81                   | 2015          | DEU                  | <i>Vitis</i> spp. interspecific hybrid direct-producer | Leaf-feeding form       |
| DEU076      | 48.19, 7.81                   | 2015          | DEU                  | <i>Vitis</i> spp. interspecific hybrid direct-producer | Leaf-feeding form       |
| DEU077      | 48.19, 7.81                   | 2015          | DEU                  | <i>Vitis</i> spp. interspecific hybrid direct-producer | Leaf-feeding form       |
| DEU078      | 48.19, 7.81                   | 2015          | DEU                  | <i>Vitis</i> spp. interspecific hybrid direct-producer | Leaf-feeding form       |
| DEU079      | 48.19, 7.81                   | 2015          | DEU                  | <i>Vitis</i> spp. interspecific hybrid direct-producer | Leaf-feeding form       |
| DEU080      | 48.19, 7.81                   | 2015          | DEU                  | <i>Vitis</i> spp. interspecific hybrid direct-producer | Leaf-feeding form       |
| DEU081      | 48.19, 7.81                   | 2015          | DEU                  | <i>Vitis</i> spp. interspecific hybrid direct-producer | Leaf-feeding form       |
| DEU082      | 48.19, 7.81                   | 2015          | DEU                  | <i>Vitis</i> spp. interspecific hybrid direct-producer | Leaf-feeding form       |
| DEU083      | 48.19, 7.81                   | 2015          | DEU                  | <i>Vitis</i> spp. interspecific hybrid direct-producer | Leaf-feeding form       |
| DEU084      | 48.19, 7.81                   | 2015          | DEU                  | <i>Vitis</i> spp. interspecific hybrid direct-producer | Leaf-feeding form       |
| DEU085      | 48.19, 7.81                   | 2015          | DEU                  | <i>Vitis</i> spp. interspecific hybrid direct-producer | Leaf-feeding form       |
| DEU086      | 48.19, 7.81                   | 2015          | DEU                  | <i>Vitis</i> spp. interspecific hybrid direct-producer | Leaf-feeding form       |
| DEU087      | 48.19, 7.81                   | 2015          | DEU                  | <i>Vitis</i> spp. interspecific hybrid direct-producer | Leaf-feeding form       |
| DEU088      | 48.19, 7.81                   | 2015          | DEU                  | <i>Vitis</i> spp. interspecific hybrid direct-producer | Leaf-feeding form       |
| DEU089      | 48.19, 7.81                   | 2015          | DEU                  | <i>Vitis</i> spp. interspecific hybrid direct-producer | Leaf-feeding form       |
| DEU090      | 48.19, 7.81                   | 2015          | DEU                  | <i>Vitis</i> spp. interspecific hybrid direct-producer | Leaf-feeding form       |
| DEU091      | 48.19, 7.81                   | 2015          | DEU                  | <i>Vitis</i> spp. interspecific hybrid direct-producer | Leaf-feeding form       |
| DEU092      | 48.19, 7.81                   | 2015          | DEU                  | <i>Vitis</i> spp. interspecific hybrid direct-producer | Leaf-feeding form       |
| DEU093      | 48.19, 7.81                   | 2015          | DEU                  | <i>Vitis</i> spp. interspecific hybrid direct-producer | Leaf-feeding form       |

| Sample code | Sampling location (lat, long) | Sampling year | Country <sup>1</sup> | Host plant                                             | Phylloxera feeding form |
|-------------|-------------------------------|---------------|----------------------|--------------------------------------------------------|-------------------------|
| DEU094      | 47.83, 7.67                   | n.a.          | DEU                  | <i>Vitis vinifera</i> L. cultivar                      | Leaf-feeding form       |
| DEU095      | 47.83, 7.67                   | n.a.          | DEU                  | <i>Vitis vinifera</i> L. cultivar                      | Leaf-feeding form       |
| DEU096      | 47.83, 7.67                   | n.a.          | DEU                  | <i>Vitis vinifera</i> L. cultivar                      | Leaf-feeding form       |
| DEU097      | 47.83, 7.67                   | n.a.          | DEU                  | <i>Vitis vinifera</i> L. cultivar                      | Root-feeding form       |
| DEU098      | 47.83, 7.67                   | n.a.          | DEU                  | <i>Vitis vinifera</i> L. cultivar                      | Root-feeding form       |
| DEU099      | 47.94, 7.76                   | n.a.          | DEU                  | <i>Vitis vinifera</i> L. cultivar                      | Leaf-feeding form       |
| DEU100      | 47.94, 7.76                   | n.a.          | DEU                  | <i>Vitis vinifera</i> L. cultivar                      | Leaf-feeding form       |
| DEU101      | 47.94, 7.76                   | n.a.          | DEU                  | <i>Vitis vinifera</i> L. cultivar                      | Leaf-feeding form       |
| DEU102      | 47.94, 7.76                   | n.a.          | DEU                  | <i>Vitis vinifera</i> L. cultivar                      | Root-feeding form       |
| DEU103      | 47.94, 7.76                   | n.a.          | DEU                  | <i>Vitis vinifera</i> L. cultivar                      | Root-feeding form       |
| DEU104      | 48.04, 7.65                   | n.a.          | DEU                  | <i>Vitis</i> spp. interspecific hybrid direct-producer | Leaf-feeding form       |
| DEU105      | 48.04, 7.65                   | n.a.          | DEU                  | <i>Vitis</i> spp. interspecific hybrid direct-producer | Leaf-feeding form       |
| DEU106      | 48.04, 7.65                   | n.a.          | DEU                  | <i>Vitis</i> spp. interspecific hybrid direct-producer | Leaf-feeding form       |
| DEU107      | 48.04, 7.65                   | n.a.          | DEU                  | <i>Vitis</i> spp. interspecific hybrid direct-producer | Leaf-feeding form       |
| DEU108      | 48.04, 7.65                   | n.a.          | DEU                  | <i>Vitis vinifera</i> L. cultivar                      | Root-feeding form       |
| DEU109      | 48.12, 7.74                   | n.a.          | DEU                  | <i>Vitis</i> spp. interspecific hybrid direct-producer | Leaf-feeding form       |
| DEU110      | 48.12, 7.74                   | n.a.          | DEU                  | <i>Vitis</i> spp. interspecific hybrid direct-producer | Leaf-feeding form       |
| DEU111      | 48.12, 7.74                   | n.a.          | DEU                  | <i>Vitis</i> spp. interspecific hybrid direct-producer | Leaf-feeding form       |
| DEU112      | 48.12, 7.74                   | n.a.          | DEU                  | <i>Vitis</i> spp. interspecific hybrid direct-producer | Leaf-feeding form       |
| DEU113      | 48.12, 7.74                   | n.a.          | DEU                  | <i>Vitis</i> spp. interspecific hybrid direct-producer | Root-feeding form       |
| DEU114      | n.a.                          | n.a.          | DEU                  | <i>Vitis vinifera</i> L. cultivar                      | Leaf-feeding form       |
| DEU115      | n.a.                          | n.a.          | DEU                  | <i>Vitis vinifera</i> L. cultivar                      | Leaf-feeding form       |
| DEU116      | n.a.                          | n.a.          | DEU                  | <i>Vitis vinifera</i> L. cultivar                      | Leaf-feeding form       |
| DEU117      | n.a.                          | n.a.          | DEU                  | <i>Vitis vinifera</i> L. cultivar                      | Leaf-feeding form       |
| CHE001      | n.a.                          | 2018          | CHE                  | <i>Vitis</i> spp. interspecific hybrid direct-producer | Leaf-feeding form       |
| CHE002      | n.a.                          | 2018          | CHE                  | <i>Vitis</i> spp. interspecific hybrid direct-producer | Leaf-feeding form       |
| CHE003      | n.a.                          | 2018          | CHE                  | <i>Vitis</i> spp. interspecific hybrid direct-producer | Leaf-feeding form       |

| Sample code | Sampling location (lat, long) | Sampling year | Country <sup>1</sup> | Host plant                                             | Phylloxera feeding form |
|-------------|-------------------------------|---------------|----------------------|--------------------------------------------------------|-------------------------|
| CHE004      | 46.42, 6.27                   | 2018          | CHE                  | <i>Vitis vinifera</i> L. cultivar                      | Leaf-feeding form       |
| CHE005      | 46.42, 6.27                   | n.a.          | CHE                  | <i>Vitis vinifera</i> L. cultivar                      | Leaf-feeding form       |
| CHE006      | 47.57, 8.25                   | 2013          | CHE                  | <i>Vitis</i> spp. interspecific rootstock              | Leaf-feeding form       |
| CHE007      | 47.57, 8.25                   | 2013          | CHE                  | <i>Vitis</i> spp. interspecific rootstock              | Leaf-feeding form       |
| CHE008      | 47.57, 8.25                   | 2013          | CHE                  | <i>Vitis</i> spp. interspecific rootstock              | Leaf-feeding form       |
| CHE009      | 47.57, 8.25                   | 2013          | CHE                  | <i>Vitis</i> spp. interspecific rootstock              | Leaf-feeding form       |
| CHE010      | 47.42, 8.17                   | 2013          | CHE                  | <i>Vitis</i> spp. interspecific hybrid direct-producer | Leaf-feeding form       |
| CHE011      | 47.42, 8.17                   | 2013          | CHE                  | <i>Vitis</i> spp. interspecific hybrid direct-producer | Leaf-feeding form       |
| CHE012      | 47.42, 8.17                   | 2013          | CHE                  | <i>Vitis</i> spp. interspecific hybrid direct-producer | Leaf-feeding form       |
| CHE013      | 47.42, 8.17                   | 2013          | CHE                  | <i>Vitis</i> spp. interspecific hybrid direct-producer | Leaf-feeding form       |
| CHE014      | 47.42, 8.17                   | 2013          | CHE                  | <i>Vitis</i> spp. interspecific hybrid direct-producer | Leaf-feeding form       |
| CHE015      | 47.42, 8.17                   | 2013          | CHE                  | <i>Vitis</i> spp. interspecific hybrid direct-producer | Root-feeding form       |
| CHE016      | 47.42, 8.17                   | 2013          | CHE                  | <i>Vitis</i> spp. interspecific hybrid direct-producer | Root-feeding form       |
| CHE017      | 47.42, 8.17                   | 2013          | CHE                  | <i>Vitis</i> spp. interspecific hybrid direct-producer | Root-feeding form       |
| CHE018      | 47.42, 8.17                   | 2013          | CHE                  | <i>Vitis</i> spp. interspecific hybrid direct-producer | Root-feeding form       |
| CHE019      | 47.43, 8.13                   | 2013          | CHE                  | <i>Vitis</i> spp. interspecific hybrid direct-producer | Leaf-feeding form       |
| CHE020      | 47.43, 8.13                   | 2013          | CHE                  | <i>Vitis</i> spp. interspecific hybrid direct-producer | Leaf-feeding form       |
| CHE021      | 47.43, 8.13                   | 2013          | CHE                  | <i>Vitis</i> spp. interspecific hybrid direct-producer | Leaf-feeding form       |
| CHE022      | 47.43, 8.13                   | 2013          | CHE                  | <i>Vitis</i> spp. interspecific hybrid direct-producer | Leaf-feeding form       |
| CHE023      | 47.43, 8.13                   | 2013          | CHE                  | <i>Vitis</i> spp. interspecific hybrid direct-producer | Leaf-feeding form       |
| CHE024      | 47.43, 8.13                   | 2013          | CHE                  | <i>Vitis</i> spp. interspecific hybrid direct-producer | Root-feeding form       |
| CHE025      | 47.43, 8.13                   | 2013          | CHE                  | <i>Vitis</i> spp. interspecific hybrid direct-producer | Root-feeding form       |
| CHE026      | 47.43, 8.13                   | 2013          | CHE                  | <i>Vitis</i> spp. interspecific hybrid direct-producer | Root-feeding form       |
| CHE027      | 47.43, 8.13                   | 2013          | CHE                  | <i>Vitis</i> spp. interspecific hybrid direct-producer | Root-feeding form       |
| CHE028      | 47.43, 8.13                   | 2013          | CHE                  | <i>Vitis</i> spp. interspecific hybrid direct-producer | Root-feeding form       |
| CHE029      | 47.43, 8.13                   | 2013          | CHE                  | <i>Vitis</i> spp. interspecific hybrid direct-producer | Root-feeding form       |
| CHE030      | 47.43, 8.12                   | 2013          | CHE                  | <i>Vitis</i> spp. interspecific hybrid direct-producer | Leaf-feeding form       |

| Sample code | Sampling location (lat, long) | Sampling year | Country <sup>1</sup> | Host plant                                              | Phylloxera feeding form |
|-------------|-------------------------------|---------------|----------------------|---------------------------------------------------------|-------------------------|
| CHE031      | 47.43, 8.12                   | 2013          | CHE                  | <i>Vitis</i> spp. interspecific hybrid direct-producer  | Leaf-feeding form       |
| CHE032      | 47.43, 8.12                   | 2013          | CHE                  | <i>Vitis</i> spp. interspecific hybrid direct-producer  | Leaf-feeding form       |
| CHE033      | 47.43, 8.12                   | 2013          | CHE                  | <i>Vitis</i> spp. interspecific hybrid direct-producer  | Leaf-feeding form       |
| CHE034      | 47.43, 8.12                   | 2013          | CHE                  | <i>Vitis</i> spp. interspecific hybrid direct-producer  | Leaf-feeding form       |
| CHE035      | 47.43, 8.12                   | 2013          | CHE                  | <i>Vitis</i> spp. interspecific hybrid direct-producer  | Root-feeding form       |
| CHE036      | 47.43, 8.12                   | 2013          | CHE                  | <i>Vitis</i> spp. interspecific hybrid direct-producer  | Root-feeding form       |
| CHE037      | 47.43, 8.12                   | 2013          | CHE                  | <i>Vitis</i> spp. interspecific hybrid direct-producer  | Root-feeding form       |
| CHE038      | 47.43, 8.12                   | 2013          | CHE                  | <i>Vitis</i> spp. interspecific hybrid direct-producer  | Root-feeding form       |
| CHE039      | 47.43, 8.12                   | 2013          | CHE                  | <i>Vitis</i> spp. interspecific hybrid direct-producer  | Root-feeding form       |
| CHE040      | 47.43, 8.12                   | 2013          | CHE                  | <i>Vitis</i> spp. interspecific hybrid direct-producer  | Root-feeding form       |
| CHE041      | 47.43, 8.12                   | 2013          | CHE                  | <i>Vitis</i> spp. interspecific hybrid direct-producer  | Root-feeding form       |
| CHE042      | 47.43, 8.12                   | 2013          | CHE                  | <i>Vitis</i> spp. interspecific hybrid direct-producer  | Root-feeding form       |
| CHE043      | 47.43, 8.12                   | 2013          | CHE                  | <i>Vitis</i> spp. interspecific hybrid direct-producer  | Root-feeding form       |
| CHE044      | 47.43, 8.12                   | 2013          | CHE                  | <i>Vitis</i> spp. interspecific hybrid direct-producer  | Root-feeding form       |
| CHE045      | 47.43, 8.12                   | 2013          | CHE                  | <i>Vitis</i> spp. interspecific hybrid direct-producer  | Root-feeding form       |
| CHE046      | 47.43, 8.12                   | 2013          | CHE                  | <i>Vitis</i> spp. interspecific hybrid direct-producer  | Root-feeding form       |
| CHE047      | 47.43, 8.12                   | 2013          | CHE                  | <i>Vitis</i> spp. interspecific hybrid direct-producer  | Root-feeding form       |
| CHE048      | 47.43, 8.12                   | 2013          | CHE                  | <i>Vitis</i> spp. interspecific hybrid direct-producer  | Root-feeding form       |
| CHE049      | 47.43, 8.12                   | 2013          | CHE                  | <i>Vitis</i> spp. interspecific hybrid direct-producer  | Root-feeding form       |
| CHE050      | 47.43, 8.12                   | 2013          | CHE                  | <i>Vitis</i> spp. interspecific hybrid direct-producer  | Root-feeding form       |
| CHE051      | 47.43, 8.12                   | 2013          | CHE                  | <i>Vitis</i> spp. interspecific hybrid direct-producer  | Root-feeding form       |
| CHE052      | 47.43, 8.12                   | 2013          | CHE                  | <i>Vitis</i> spp. interspecific hybrid direct-producer  | Root-feeding form       |
| CHE053      | 47.52, 7.83                   | 2013          | CHE                  | <i>Vitis</i> spp. interspecific resistant grape variety | Leaf-feeding form       |
| CHE054      | 47.52, 7.83                   | 2013          | CHE                  | <i>Vitis</i> spp. interspecific resistant grape variety | Leaf-feeding form       |
| CHE055      | 47.52, 7.83                   | 2013          | CHE                  | <i>Vitis</i> spp. interspecific resistant grape variety | Leaf-feeding form       |
| CHE056      | 47.52, 7.83                   | 2013          | CHE                  | <i>Vitis</i> spp. interspecific resistant grape variety | Leaf-feeding form       |
| CHE057      | 47.52, 7.83                   | 2013          | CHE                  | <i>Vitis</i> spp. interspecific resistant grape variety | Leaf-feeding form       |



| Sample code | Sampling location (lat, long) | Sampling year | Country <sup>1</sup> | Host plant                                              | Phylloxera feeding form |
|-------------|-------------------------------|---------------|----------------------|---------------------------------------------------------|-------------------------|
| CHE058      | 47.52, 7.83                   | 2013          | CHE                  | <i>Vitis</i> spp. interspecific resistant grape variety | Root-feeding form       |
| CHE059      | 47.52, 7.83                   | 2013          | CHE                  | <i>Vitis</i> spp. interspecific resistant grape variety | Root-feeding form       |
| CHE060      | 47.52, 7.82                   | 2013          | CHE                  | <i>Vitis</i> spp. interspecific resistant grape variety | Root-feeding form       |
| CHE061      | 47.52, 7.82                   | 2013          | CHE                  | <i>Vitis</i> spp. interspecific resistant grape variety | Root-feeding form       |
| CHE062      | 47.52, 7.82                   | 2013          | CHE                  | <i>Vitis</i> spp. interspecific resistant grape variety | Root-feeding form       |
| CHE063      | 47.52, 7.82                   | 2013          | CHE                  | <i>Vitis</i> spp. interspecific resistant grape variety | Leaf-feeding form       |
| CHE064      | 47.52, 7.82                   | 2013          | CHE                  | <i>Vitis</i> spp. interspecific resistant grape variety | Leaf-feeding form       |
| CHE065      | 47.52, 7.82                   | 2013          | CHE                  | <i>Vitis</i> spp. interspecific resistant grape variety | Leaf-feeding form       |
| CHE066      | 47.52, 7.82                   | 2013          | CHE                  | <i>Vitis</i> spp. interspecific resistant grape variety | Leaf-feeding form       |
| CHE067      | 47.52, 7.82                   | 2013          | CHE                  | <i>Vitis</i> spp. interspecific resistant grape variety | Leaf-feeding form       |
| CHE068      | 47.52, 7.82                   | 2013          | CHE                  | <i>Vitis vinifera</i> L. cultivar                       | Root-feeding form       |
| CHE069      | 47.52, 7.82                   | 2013          | CHE                  | <i>Vitis vinifera</i> L. cultivar                       | Root-feeding form       |
| CHE070      | 47.52, 7.82                   | 2013          | CHE                  | <i>Vitis vinifera</i> L. cultivar                       | Leaf-feeding form       |
| CHE071      | 47.52, 7.82                   | 2013          | CHE                  | <i>Vitis vinifera</i> L. cultivar                       | Leaf-feeding form       |
| CHE072      | 47.52, 7.82                   | 2013          | CHE                  | <i>Vitis vinifera</i> L. cultivar                       | Leaf-feeding form       |
| CHE073      | 47.52, 7.82                   | 2013          | CHE                  | <i>Vitis vinifera</i> L. cultivar                       | Leaf-feeding form       |
| CHE074      | 47.52, 7.82                   | 2013          | CHE                  | <i>Vitis vinifera</i> L. cultivar                       | Leaf-feeding form       |
| CHE075      | 47.48, 7.57                   | 2013          | CHE                  | <i>Vitis</i> spp. interspecific hybrid direct-producer  | Leaf-feeding form       |
| CHE076      | 47.48, 7.57                   | 2013          | CHE                  | <i>Vitis</i> spp. interspecific hybrid direct-producer  | Leaf-feeding form       |
| CHE077      | 47.48, 7.57                   | 2013          | CHE                  | <i>Vitis</i> spp. interspecific hybrid direct-producer  | Leaf-feeding form       |
| CHE078      | 47.48, 7.57                   | 2013          | CHE                  | <i>Vitis</i> spp. interspecific hybrid direct-producer  | Leaf-feeding form       |
| CHE079      | 47.48, 7.57                   | 2013          | CHE                  | <i>Vitis</i> spp. interspecific hybrid direct-producer  | Leaf-feeding form       |
| CHE080      | 47.48, 7.57                   | 2013          | CHE                  | <i>Vitis</i> spp. interspecific hybrid direct-producer  | Root-feeding form       |
| CHE081      | 47.48, 7.48                   | 2013          | CHE                  | <i>Vitis vinifera</i> L. cultivar                       | Leaf-feeding form       |
| CHE082      | 47.48, 7.48                   | 2013          | CHE                  | <i>Vitis vinifera</i> L. cultivar                       | Leaf-feeding form       |
| CHE083      | 47.48, 7.48                   | 2013          | CHE                  | <i>Vitis vinifera</i> L. cultivar                       | Leaf-feeding form       |
| CHE084      | 47.48, 7.48                   | 2013          | CHE                  | <i>Vitis vinifera</i> L. cultivar                       | Leaf-feeding form       |

| Sample code | Sampling location (lat, long) | Sampling year | Country <sup>1</sup> | Host plant                                             | Phylloxera feeding form |
|-------------|-------------------------------|---------------|----------------------|--------------------------------------------------------|-------------------------|
| CHE085      | 47.48, 7.48                   | 2013          | CHE                  | <i>Vitis vinifera</i> L. cultivar                      | Leaf-feeding form       |
| CHE086      | 47.48, 7.48                   | 2013          | CHE                  | <i>Vitis</i> spp. interspecific rootstock              | Root-feeding form       |
| CHE087      | 47.48, 7.48                   | 2013          | CHE                  | <i>Vitis</i> spp. interspecific rootstock              | Root-feeding form       |
| CHE088      | 47.5, 7.53                    | 2013          | CHE                  | <i>Vitis</i> spp. interspecific hybrid direct-producer | Leaf-feeding form       |
| CHE089      | 47.5, 7.53                    | 2013          | CHE                  | <i>Vitis</i> spp. interspecific hybrid direct-producer | Leaf-feeding form       |
| CHE090      | 47.5, 7.53                    | 2013          | CHE                  | <i>Vitis</i> spp. interspecific hybrid direct-producer | Leaf-feeding form       |
| CHE091      | 47.5, 7.53                    | 2013          | CHE                  | <i>Vitis</i> spp. interspecific hybrid direct-producer | Leaf-feeding form       |
| CHE092      | 47.5, 7.53                    | 2013          | CHE                  | <i>Vitis</i> spp. interspecific hybrid direct-producer | Leaf-feeding form       |
| CHE093      | 47.5, 7.53                    | 2013          | CHE                  | <i>Vitis</i> spp. interspecific hybrid direct-producer | Leaf-feeding form       |
| CHE094      | 47.5, 7.53                    | 2013          | CHE                  | <i>Vitis</i> spp. interspecific hybrid direct-producer | Leaf-feeding form       |
| CHE095      | 47.5, 7.53                    | 2013          | CHE                  | <i>Vitis</i> spp. interspecific hybrid direct-producer | Leaf-feeding form       |
| CHE096      | 47.5, 7.53                    | 2013          | CHE                  | <i>Vitis</i> spp. interspecific hybrid direct-producer | Leaf-feeding form       |
| CHE097      | 47.5, 7.53                    | 2013          | CHE                  | n.a.                                                   | n.a.                    |
| CHE098      | 46.98, 9.55                   | 2013          | CHE                  | <i>Vitis</i> spp. interspecific hybrid direct-producer | Leaf-feeding form       |
| CHE099      | 46.98, 9.55                   | 2013          | CHE                  | <i>Vitis</i> spp. interspecific hybrid direct-producer | Leaf-feeding form       |
| CHE100      | 46.98, 9.55                   | 2013          | CHE                  | <i>Vitis</i> spp. interspecific hybrid direct-producer | Leaf-feeding form       |
| CHE101      | 46.98, 9.55                   | 2013          | CHE                  | <i>Vitis</i> spp. interspecific hybrid direct-producer | Leaf-feeding form       |
| CHE102      | 46.98, 9.55                   | 2013          | CHE                  | <i>Vitis</i> spp. interspecific hybrid direct-producer | Leaf-feeding form       |
| CHE103      | 46.98, 9.55                   | 2013          | CHE                  | <i>Vitis</i> spp. interspecific hybrid direct-producer | Root-feeding form       |
| CHE104      | 46.98, 9.55                   | 2013          | CHE                  | <i>Vitis</i> spp. interspecific hybrid direct-producer | Root-feeding form       |
| CHE105      | 46.98, 9.55                   | 2013          | CHE                  | <i>Vitis</i> spp. interspecific hybrid direct-producer | Root-feeding form       |
| CHE106      | 46.98, 9.55                   | 2013          | CHE                  | <i>Vitis</i> spp. interspecific hybrid direct-producer | Root-feeding form       |
| CHE107      | 46.98, 9.55                   | 2013          | CHE                  | <i>Vitis</i> spp. interspecific hybrid direct-producer | Root-feeding form       |
| CHE108      | 46.98, 9.55                   | 2013          | CHE                  | <i>Vitis</i> spp. interspecific hybrid direct-producer | Root-feeding form       |
| CHE109      | 46.98, 9.55                   | 2013          | CHE                  | <i>Vitis</i> spp. interspecific hybrid direct-producer | Root-feeding form       |
| CHE110      | 46.98, 9.55                   | 2013          | CHE                  | <i>Vitis</i> spp. interspecific hybrid direct-producer | Root-feeding form       |
| CHE111      | 46.98, 9.55                   | 2013          | CHE                  | <i>Vitis</i> spp. interspecific hybrid direct-producer | Root-feeding form       |

| Sample code | Sampling location (lat, long) | Sampling year | Country <sup>1</sup> | Host plant                                             | Phylloxera feeding form |
|-------------|-------------------------------|---------------|----------------------|--------------------------------------------------------|-------------------------|
| CHE112      | 46.97, 9.57                   | 2013          | CHE                  | <i>Vitis</i> spp. interspecific rootstock              | Root-feeding form       |
| CHE113      | 46.97, 9.57                   | 2013          | CHE                  | <i>Vitis</i> spp. interspecific rootstock              | Root-feeding form       |
| CHE114      | 46.97, 9.57                   | 2013          | CHE                  | <i>Vitis</i> spp. interspecific rootstock              | Root-feeding form       |
| CHE115      | 46.97, 9.57                   | 2013          | CHE                  | <i>Vitis</i> spp. interspecific rootstock              | Root-feeding form       |
| CHE116      | 46.97, 9.57                   | 2013          | CHE                  | <i>Vitis</i> spp. interspecific rootstock              | Root-feeding form       |
| CHE117      | 47.05, 9.43                   | 2013          | CHE                  | <i>Vitis</i> spp. interspecific hybrid direct-producer | Leaf-feeding form       |
| CHE118      | 47.05, 9.43                   | 2013          | CHE                  | <i>Vitis</i> spp. interspecific hybrid direct-producer | Leaf-feeding form       |
| CHE119      | 47.05, 9.43                   | 2013          | CHE                  | <i>Vitis</i> spp. interspecific hybrid direct-producer | Leaf-feeding form       |
| CHE120      | 47.05, 9.43                   | 2013          | CHE                  | <i>Vitis</i> spp. interspecific hybrid direct-producer | Leaf-feeding form       |
| CHE121      | 47.05, 9.43                   | 2013          | CHE                  | <i>Vitis</i> spp. interspecific hybrid direct-producer | Leaf-feeding form       |
| CHE122      | 47.05, 9.43                   | 2013          | CHE                  | <i>Vitis</i> spp. interspecific rootstock              | Root-feeding form       |
| CHE123      | 47.05, 9.43                   | 2013          | CHE                  | <i>Vitis</i> spp. interspecific rootstock              | Root-feeding form       |
| CHE124      | 47.05, 9.43                   | 2013          | CHE                  | <i>Vitis</i> spp. interspecific rootstock              | Root-feeding form       |
| CHE125      | 47.05, 9.43                   | 2013          | CHE                  | <i>Vitis</i> spp. interspecific rootstock              | Root-feeding form       |
| CHE126      | 47.05, 9.43                   | 2013          | CHE                  | <i>Vitis</i> spp. interspecific rootstock              | Root-feeding form       |
| CHE127      | 47.12, 9.23                   | n.a.          | CHE                  | <i>Vitis</i> spp. interspecific hybrid direct-producer | Leaf-feeding form       |
| CHE128      | 47.12, 9.23                   | n.a.          | CHE                  | <i>Vitis</i> spp. interspecific hybrid direct-producer | Leaf-feeding form       |
| CHE129      | 47.12, 9.23                   | n.a.          | CHE                  | <i>Vitis</i> spp. interspecific hybrid direct-producer | Leaf-feeding form       |
| CHE130      | 47.12, 9.23                   | n.a.          | CHE                  | <i>Vitis</i> spp. interspecific hybrid direct-producer | Leaf-feeding form       |
| CHE131      | 47.12, 9.23                   | n.a.          | CHE                  | <i>Vitis</i> spp. interspecific hybrid direct-producer | Leaf-feeding form       |
| CHE132      | 47.12, 9.23                   | n.a.          | CHE                  | <i>Vitis</i> spp. interspecific hybrid direct-producer | Leaf-feeding form       |
| CHE133      | 47.12, 9.23                   | n.a.          | CHE                  | <i>Vitis</i> spp. interspecific hybrid direct-producer | Leaf-feeding form       |
| CHE134      | 47.12, 9.23                   | n.a.          | CHE                  | <i>Vitis</i> spp. interspecific hybrid direct-producer | Leaf-feeding form       |
| CHE135      | 47.12, 9.23                   | n.a.          | CHE                  | <i>Vitis</i> spp. interspecific hybrid direct-producer | Leaf-feeding form       |
| CHE136      | 47.83, 8.97                   | 2013          | CHE                  | <i>Vitis vinifera</i> L. cultivar                      | Leaf-feeding form       |
| CHE137      | 47.83, 8.97                   | 2013          | CHE                  | <i>Vitis vinifera</i> L. cultivar                      | Leaf-feeding form       |
| CHE138      | 47.83, 8.97                   | 2013          | CHE                  | <i>Vitis vinifera</i> L. cultivar                      | Leaf-feeding form       |

| Sample code | Sampling location (lat, long) | Sampling year | Country <sup>1</sup> | Host plant                                             | Phylloxera feeding form |
|-------------|-------------------------------|---------------|----------------------|--------------------------------------------------------|-------------------------|
| CHE139      | 47.83, 8.97                   | 2013          | CHE                  | <i>Vitis vinifera</i> L. cultivar                      | Leaf-feeding form       |
| CHE140      | 47.83, 8.97                   | 2013          | CHE                  | <i>Vitis vinifera</i> L. cultivar                      | Leaf-feeding form       |
| CHE141      | 47.83, 8.97                   | 2013          | CHE                  | <i>Vitis vinifera</i> L. cultivar                      | Leaf-feeding form       |
| CHE142      | 47.83, 8.97                   | 2013          | CHE                  | <i>Vitis vinifera</i> L. cultivar                      | Leaf-feeding form       |
| CHE143      | 47.83, 8.97                   | 2013          | CHE                  | <i>Vitis vinifera</i> L. cultivar                      | Leaf-feeding form       |
| CHE144      | n.a.                          | 2013          | CHE                  | n.a.                                                   | n.a.                    |
| CHE145      | n.a.                          | 2013          | CHE                  | n.a.                                                   | n.a.                    |
| CHE146      | n.a.                          | 2013          | CHE                  | n.a.                                                   | n.a.                    |
| CHE147      | n.a.                          | 2013          | CHE                  | n.a.                                                   | n.a.                    |
| CHE148      | 46.5, 6.67                    | n.a.          | CHE                  | <i>Vitis</i> spp. interspecific hybrid direct-producer | Leaf-feeding form       |
| CHE149      | 46.5, 6.67                    | n.a.          | CHE                  | <i>Vitis</i> spp. interspecific hybrid direct-producer | Leaf-feeding form       |
| CHE150      | 46.5, 6.67                    | n.a.          | CHE                  | <i>Vitis</i> spp. interspecific hybrid direct-producer | Leaf-feeding form       |
| CHE151      | 46.5, 6.67                    | n.a.          | CHE                  | <i>Vitis</i> spp. interspecific hybrid direct-producer | Leaf-feeding form       |
| CHE152      | 47.08, 7.15                   | 2013          | CHE                  | <i>Vitis</i> spp. interspecific rootstock              | Root-feeding form       |
| CHE153      | 47.08, 7.15                   | 2013          | CHE                  | <i>Vitis</i> spp. interspecific rootstock              | Root-feeding form       |
| CHE154      | 47.08, 7.15                   | 2013          | CHE                  | <i>Vitis</i> spp. interspecific rootstock              | Root-feeding form       |
| CHE155      | 47.08, 7.13                   | 2013          | CHE                  | <i>Vitis</i> spp. interspecific hybrid direct-producer | Leaf-feeding form       |
| CHE156      | 47.08, 7.13                   | 2013          | CHE                  | <i>Vitis</i> spp. interspecific hybrid direct-producer | Leaf-feeding form       |
| CHE157      | 47.08, 7.13                   | 2013          | CHE                  | <i>Vitis</i> spp. interspecific hybrid direct-producer | Leaf-feeding form       |
| CHE158      | 47.08, 7.13                   | 2013          | CHE                  | <i>Vitis</i> spp. interspecific hybrid direct-producer | Leaf-feeding form       |
| CHE159      | 47.08, 7.13                   | 2013          | CHE                  | <i>Vitis</i> spp. interspecific hybrid direct-producer | Leaf-feeding form       |
| CHE160      | 47.07, 7.09                   | 2013          | CHE                  | <i>Vitis</i> spp. interspecific hybrid direct-producer | Leaf-feeding form       |
| CHE161      | 47.07, 7.09                   | 2013          | CHE                  | <i>Vitis</i> spp. interspecific hybrid direct-producer | Leaf-feeding form       |
| CHE162      | 47.07, 7.09                   | 2013          | CHE                  | <i>Vitis</i> spp. interspecific hybrid direct-producer | Leaf-feeding form       |
| CHE163      | 47.07, 7.09                   | 2013          | CHE                  | <i>Vitis</i> spp. interspecific hybrid direct-producer | Leaf-feeding form       |
| CHE164      | 47.07, 7.09                   | 2013          | CHE                  | <i>Vitis</i> spp. interspecific hybrid direct-producer | Leaf-feeding form       |
| CHE165      | 47.08, 7.15                   | 2013          | CHE                  | <i>Vitis</i> spp. interspecific hybrid direct-producer | Leaf-feeding form       |

| Sample code | Sampling location (lat, long) | Sampling year | Country <sup>1</sup> | Host plant                                             | Phylloxera feeding form |
|-------------|-------------------------------|---------------|----------------------|--------------------------------------------------------|-------------------------|
| CHE166      | 47.08, 7.15                   | 2013          | CHE                  | <i>Vitis</i> spp. interspecific hybrid direct-producer | Leaf-feeding form       |
| CHE167      | 46.41, 6.23                   | n.a.          | CHE                  | <i>Vitis</i> spp. interspecific rootstock              | Root-feeding form       |
| CHE168      | 46.41, 6.23                   | n.a.          | CHE                  | <i>Vitis</i> spp. interspecific rootstock              | Root-feeding form       |
| CHE169      | 46.41, 6.23                   | n.a.          | CHE                  | <i>Vitis</i> spp. interspecific rootstock              | Root-feeding form       |
| CHE170      | 46.41, 6.23                   | n.a.          | CHE                  | <i>Vitis</i> spp. interspecific rootstock              | Root-feeding form       |
| CHE171      | 46.41, 6.23                   | n.a.          | CHE                  | <i>Vitis</i> spp. interspecific rootstock              | Root-feeding form       |
| CHE172      | 46.41, 6.23                   | n.a.          | CHE                  | <i>Vitis</i> spp. interspecific rootstock              | Root-feeding form       |
| CHE173      | 46.41, 6.23                   | n.a.          | CHE                  | <i>Vitis</i> spp. interspecific rootstock              | Root-feeding form       |
| CHE174      | 47.53, 8.58                   | 2013          | CHE                  | <i>Vitis</i> spp. interspecific hybrid direct-producer | Leaf-feeding form       |
| CHE175      | 47.53, 8.58                   | 2013          | CHE                  | <i>Vitis</i> spp. interspecific hybrid direct-producer | Leaf-feeding form       |
| CHE176      | 47.53, 8.58                   | 2013          | CHE                  | <i>Vitis</i> spp. interspecific hybrid direct-producer | Leaf-feeding form       |
| CHE177      | 47.53, 8.58                   | 2013          | CHE                  | <i>Vitis</i> spp. interspecific hybrid direct-producer | Leaf-feeding form       |
| CHE178      | 47.53, 8.58                   | 2013          | CHE                  | <i>Vitis</i> spp. interspecific hybrid direct-producer | Leaf-feeding form       |
| CHE179      | 47.53, 8.58                   | 2013          | CHE                  | <i>Vitis</i> spp. interspecific hybrid direct-producer | Root-feeding form       |
| CHE180      | 47.53, 8.58                   | 2013          | CHE                  | <i>Vitis</i> spp. interspecific hybrid direct-producer | Root-feeding form       |
| CHE181      | 47.53, 8.58                   | 2013          | CHE                  | <i>Vitis</i> spp. interspecific hybrid direct-producer | Root-feeding form       |
| CHE182      | 47.53, 8.58                   | 2013          | CHE                  | <i>Vitis</i> spp. interspecific hybrid direct-producer | Root-feeding form       |
| CHE183      | 47.53, 8.58                   | 2013          | CHE                  | <i>Vitis</i> spp. interspecific hybrid direct-producer | Root-feeding form       |
| CHE184      | 47.53, 8.58                   | 2013          | CHE                  | <i>Vitis</i> spp. interspecific hybrid direct-producer | Root-feeding form       |
| CHE185      | 47.53, 8.58                   | 2013          | CHE                  | <i>Vitis</i> spp. interspecific hybrid direct-producer | Root-feeding form       |
| CHE186      | 47.63, 8.67                   | 2013          | CHE                  | <i>Vitis</i> spp. interspecific hybrid direct-producer | Leaf-feeding form       |
| CHE187      | 47.63, 8.67                   | 2013          | CHE                  | <i>Vitis</i> spp. interspecific hybrid direct-producer | Leaf-feeding form       |
| CHE188      | 47.63, 8.67                   | 2013          | CHE                  | <i>Vitis</i> spp. interspecific hybrid direct-producer | Leaf-feeding form       |
| CHE189      | 47.63, 8.67                   | 2013          | CHE                  | <i>Vitis</i> spp. interspecific hybrid direct-producer | Leaf-feeding form       |
| CHE190      | 47.63, 8.67                   | 2013          | CHE                  | <i>Vitis</i> spp. interspecific hybrid direct-producer | Leaf-feeding form       |
| CHE191      | 47.63, 8.67                   | 2013          | CHE                  | <i>Vitis</i> spp. interspecific rootstock              | Root-feeding form       |
| CHE192      | 47.63, 8.67                   | 2013          | CHE                  | <i>Vitis</i> spp. interspecific rootstock              | Root-feeding form       |

| Sample code | Sampling location (lat, long) | Sampling year | Country <sup>1</sup> | Host plant                                             | Phylloxera feeding form |
|-------------|-------------------------------|---------------|----------------------|--------------------------------------------------------|-------------------------|
| CHE193      | 47.63, 8.67                   | 2013          | CHE                  | <i>Vitis</i> spp. interspecific rootstock              | Root-feeding form       |
| CHE194      | 47.63, 8.67                   | 2013          | CHE                  | <i>Vitis</i> spp. interspecific rootstock              | Root-feeding form       |
| CHE195      | 47.63, 8.67                   | 2013          | CHE                  | <i>Vitis</i> spp. interspecific rootstock              | Root-feeding form       |
| CHE196      | 47.63, 8.67                   | 2013          | CHE                  | <i>Vitis</i> spp. interspecific rootstock              | Root-feeding form       |
| CHE197      | 47.63, 8.67                   | 2013          | CHE                  | <i>Vitis</i> spp. interspecific rootstock              | Root-feeding form       |
| CHE198      | 47.63, 8.67                   | 2013          | CHE                  | <i>Vitis</i> spp. interspecific rootstock              | Root-feeding form       |
| CHE199      | 47.63, 8.67                   | 2013          | CHE                  | <i>Vitis</i> spp. interspecific rootstock              | Root-feeding form       |
| CHE200      | 47.63, 8.67                   | 2013          | CHE                  | <i>Vitis</i> spp. interspecific rootstock              | Root-feeding form       |
| CHE201      | 47.63, 8.67                   | 2013          | CHE                  | <i>Vitis</i> spp. interspecific hybrid direct-producer | Leaf-feeding form       |
| CHE202      | 47.63, 8.67                   | 2013          | CHE                  | <i>Vitis</i> spp. interspecific hybrid direct-producer | Leaf-feeding form       |
| CHE203      | 47.63, 8.67                   | 2013          | CHE                  | <i>Vitis</i> spp. interspecific hybrid direct-producer | Leaf-feeding form       |
| CHE204      | 47.63, 8.67                   | 2013          | CHE                  | <i>Vitis</i> spp. interspecific hybrid direct-producer | Leaf-feeding form       |
| CHE205      | 47.63, 8.67                   | 2013          | CHE                  | <i>Vitis</i> spp. interspecific hybrid direct-producer | Leaf-feeding form       |
| CHE206      | 47.63, 8.67                   | 2013          | CHE                  | <i>Vitis</i> spp. interspecific hybrid direct-producer | Root-feeding form       |
| CHE207      | 47.63, 8.67                   | 2013          | CHE                  | <i>Vitis</i> spp. interspecific hybrid direct-producer | Root-feeding form       |
| CHE208      | 47.63, 8.67                   | 2013          | CHE                  | <i>Vitis</i> spp. interspecific hybrid direct-producer | Root-feeding form       |
| CHE209      | 47.63, 8.67                   | 2013          | CHE                  | <i>Vitis</i> spp. interspecific hybrid direct-producer | Root-feeding form       |
| CHE210      | 47.63, 8.67                   | 2013          | CHE                  | <i>Vitis</i> spp. interspecific hybrid direct-producer | Root-feeding form       |
| CHE211      | 47.63, 8.67                   | 2013          | CHE                  | <i>Vitis</i> spp. interspecific hybrid direct-producer | Root-feeding form       |
| CHE212      | 47.63, 8.67                   | 2013          | CHE                  | <i>Vitis</i> spp. interspecific hybrid direct-producer | Root-feeding form       |
| CHE213      | 47.63, 8.67                   | 2013          | CHE                  | <i>Vitis</i> spp. interspecific hybrid direct-producer | Root-feeding form       |
| CHE214      | 47.63, 8.67                   | 2013          | CHE                  | <i>Vitis</i> spp. interspecific hybrid direct-producer | Root-feeding form       |
| CHE215      | 47.63, 8.67                   | 2013          | CHE                  | <i>Vitis</i> spp. interspecific hybrid direct-producer | Root-feeding form       |
| CHE216      | 47.58, 8.8                    | 2013          | CHE                  | <i>Vitis</i> spp. interspecific hybrid direct-producer | Leaf-feeding form       |
| CHE217      | 47.58, 8.8                    | 2013          | CHE                  | <i>Vitis</i> spp. interspecific hybrid direct-producer | Leaf-feeding form       |
| CHE218      | 47.58, 8.8                    | 2013          | CHE                  | <i>Vitis</i> spp. interspecific hybrid direct-producer | Leaf-feeding form       |
| CHE219      | 47.58, 8.8                    | 2013          | CHE                  | <i>Vitis</i> spp. interspecific hybrid direct-producer | Leaf-feeding form       |

| Sample code | Sampling location (lat, long) | Sampling year | Country <sup>1</sup> | Host plant                                             | Phylloxera feeding form |
|-------------|-------------------------------|---------------|----------------------|--------------------------------------------------------|-------------------------|
| CHE220      | 47.58, 8.8                    | 2013          | CHE                  | <i>Vitis</i> spp. interspecific hybrid direct-producer | Leaf-feeding form       |
| CHE221      | 47.58, 8.8                    | 2013          | CHE                  | <i>Vitis</i> spp. interspecific hybrid direct-producer | Leaf-feeding form       |
| CHE222      | 47.58, 8.8                    | 2013          | CHE                  | <i>Vitis</i> spp. interspecific rootstock              | Root-feeding form       |
| CHE223      | 47.58, 8.8                    | 2013          | CHE                  | <i>Vitis</i> spp. interspecific rootstock              | Root-feeding form       |
| CHE224      | 47.58, 8.8                    | 2013          | CHE                  | <i>Vitis</i> spp. interspecific rootstock              | Root-feeding form       |
| CHE225      | 47.58, 8.8                    | 2013          | CHE                  | <i>Vitis</i> spp. interspecific rootstock              | Root-feeding form       |
| CHE226      | 47.58, 8.8                    | 2013          | CHE                  | <i>Vitis</i> spp. interspecific rootstock              | Root-feeding form       |
| CHE227      | 47.58, 8.8                    | 2013          | CHE                  | <i>Vitis</i> spp. interspecific rootstock              | Root-feeding form       |
| CHE228      | 47.58, 8.8                    | 2013          | CHE                  | <i>Vitis</i> spp. interspecific rootstock              | Root-feeding form       |
| CHE229      | 47.58, 8.8                    | 2013          | CHE                  | <i>Vitis</i> spp. interspecific rootstock              | Root-feeding form       |
| CHE230      | 47.58, 8.8                    | 2013          | CHE                  | <i>Vitis</i> spp. interspecific rootstock              | Root-feeding form       |
| CHE231      | 47.58, 8.8                    | 2013          | CHE                  | <i>Vitis</i> spp. interspecific rootstock              | Root-feeding form       |
| CHE232      | 47.7, 8.45                    | 2013          | CHE                  | <i>Vitis</i> spp. interspecific hybrid direct-producer | Leaf-feeding form       |
| CHE233      | 47.7, 8.45                    | 2013          | CHE                  | <i>Vitis</i> spp. interspecific hybrid direct-producer | Leaf-feeding form       |
| CHE234      | 47.7, 8.45                    | 2013          | CHE                  | <i>Vitis</i> spp. interspecific hybrid direct-producer | Leaf-feeding form       |
| CHE235      | 47.7, 8.45                    | 2013          | CHE                  | <i>Vitis</i> spp. interspecific hybrid direct-producer | Leaf-feeding form       |
| CHE236      | 47.7, 8.45                    | 2013          | CHE                  | <i>Vitis</i> spp. interspecific hybrid direct-producer | Leaf-feeding form       |
| CHE237      | 47.7, 8.45                    | 2013          | CHE                  | <i>Vitis</i> spp. interspecific rootstock              | Root-feeding form       |
| CHE238      | 47.7, 8.45                    | 2013          | CHE                  | <i>Vitis</i> spp. interspecific rootstock              | Root-feeding form       |
| CHE239      | 47.7, 8.45                    | 2013          | CHE                  | <i>Vitis</i> spp. interspecific rootstock              | Root-feeding form       |
| CHE240      | 47.7, 8.45                    | 2013          | CHE                  | <i>Vitis</i> spp. interspecific rootstock              | Root-feeding form       |
| CHE241      | 47.7, 8.45                    | 2013          | CHE                  | <i>Vitis</i> spp. interspecific rootstock              | Root-feeding form       |
| CHE242      | 47.52, 8.62                   | 2013          | CHE                  | <i>Vitis</i> spp. interspecific hybrid direct-producer | Leaf-feeding form       |
| CHE243      | 47.52, 8.62                   | 2013          | CHE                  | <i>Vitis</i> spp. interspecific hybrid direct-producer | Leaf-feeding form       |
| CHE244      | 47.52, 8.62                   | 2013          | CHE                  | <i>Vitis</i> spp. interspecific hybrid direct-producer | Leaf-feeding form       |
| CHE245      | 47.52, 8.62                   | 2013          | CHE                  | <i>Vitis</i> spp. interspecific hybrid direct-producer | Leaf-feeding form       |
| CHE246      | 47.52, 8.62                   | 2013          | CHE                  | <i>Vitis</i> spp. interspecific hybrid direct-producer | Leaf-feeding form       |

| Sample code | Sampling location (lat, long) | Sampling year | Country <sup>1</sup> | Host plant                                             | Phylloxera feeding form |
|-------------|-------------------------------|---------------|----------------------|--------------------------------------------------------|-------------------------|
| CHE247      | 47.52, 8.62                   | 2013          | CHE                  | <i>Vitis</i> spp. interspecific rootstock              | Root-feeding form       |
| CHE248      | 47.52, 8.62                   | 2013          | CHE                  | <i>Vitis</i> spp. interspecific rootstock              | Root-feeding form       |
| CHE249      | 47.52, 8.62                   | 2013          | CHE                  | <i>Vitis</i> spp. interspecific rootstock              | Root-feeding form       |
| CHE250      | 47.52, 8.62                   | 2013          | CHE                  | <i>Vitis</i> spp. interspecific rootstock              | Root-feeding form       |
| CHE251      | 47.52, 8.62                   | 2013          | CHE                  | <i>Vitis</i> spp. interspecific rootstock              | Root-feeding form       |
| CHE252      | 47.47, 8.43                   | 2013          | CHE                  | <i>Vitis</i> spp. interspecific hybrid direct-producer | Leaf-feeding form       |
| CHE253      | 47.47, 8.43                   | 2013          | CHE                  | <i>Vitis</i> spp. interspecific hybrid direct-producer | Leaf-feeding form       |
| CHE254      | 47.47, 8.43                   | 2013          | CHE                  | <i>Vitis</i> spp. interspecific hybrid direct-producer | Leaf-feeding form       |
| CHE255      | 47.47, 8.43                   | 2013          | CHE                  | <i>Vitis</i> spp. interspecific hybrid direct-producer | Leaf-feeding form       |
| CHE256      | 47.47, 8.43                   | 2013          | CHE                  | <i>Vitis</i> spp. interspecific hybrid direct-producer | Leaf-feeding form       |
| CHE257      | 47.47, 8.43                   | 2013          | CHE                  | <i>Vitis</i> spp. interspecific hybrid direct-producer | Root-feeding form       |
| CHE258      | 47.47, 8.43                   | 2013          | CHE                  | <i>Vitis</i> spp. interspecific hybrid direct-producer | Root-feeding form       |
| CHE259      | 47.47, 8.43                   | 2013          | CHE                  | <i>Vitis</i> spp. interspecific hybrid direct-producer | Root-feeding form       |
| CHE260      | 47.47, 8.43                   | 2013          | CHE                  | <i>Vitis</i> spp. interspecific hybrid direct-producer | Root-feeding form       |
| CHE261      | 47.47, 8.43                   | 2013          | CHE                  | <i>Vitis</i> spp. interspecific hybrid direct-producer | Root-feeding form       |
| CHE262      | 47.47, 8.43                   | 2013          | CHE                  | <i>Vitis</i> spp. interspecific hybrid direct-producer | Leaf-feeding form       |
| CHE263      | 47.47, 8.43                   | 2013          | CHE                  | <i>Vitis</i> spp. interspecific hybrid direct-producer | Leaf-feeding form       |
| CHE264      | 47.47, 8.43                   | 2013          | CHE                  | <i>Vitis</i> spp. interspecific hybrid direct-producer | Leaf-feeding form       |
| CHE265      | 47.47, 8.43                   | 2013          | CHE                  | <i>Vitis</i> spp. interspecific hybrid direct-producer | Leaf-feeding form       |
| CHE266      | 47.47, 8.43                   | 2013          | CHE                  | <i>Vitis</i> spp. interspecific hybrid direct-producer | Leaf-feeding form       |
| CHE267      | 47.47, 8.43                   | 2013          | CHE                  | <i>Vitis</i> spp. interspecific rootstock              | Root-feeding form       |
| CHE268      | 47.47, 8.43                   | 2013          | CHE                  | <i>Vitis</i> spp. interspecific rootstock              | Root-feeding form       |
| CHE269      | 47.47, 8.43                   | 2013          | CHE                  | <i>Vitis</i> spp. interspecific rootstock              | Root-feeding form       |
| CHE270      | 47.47, 8.43                   | 2013          | CHE                  | <i>Vitis</i> spp. interspecific rootstock              | Root-feeding form       |
| CHE271      | 47.6, 8.52                    | 2013          | CHE                  | <i>Vitis</i> spp. interspecific hybrid direct-producer | Leaf-feeding form       |
| CHE272      | 47.6, 8.52                    | 2013          | CHE                  | <i>Vitis</i> spp. interspecific hybrid direct-producer | Leaf-feeding form       |
| CHE273      | 47.6, 8.52                    | 2013          | CHE                  | <i>Vitis</i> spp. interspecific hybrid direct-producer | Leaf-feeding form       |



| Sample code | Sampling location (lat, long) | Sampling year | Country <sup>1</sup> | Host plant                                             | Phylloxera feeding form |
|-------------|-------------------------------|---------------|----------------------|--------------------------------------------------------|-------------------------|
| CHE274      | 47.6, 8.52                    | 2013          | CHE                  | <i>Vitis</i> spp. interspecific hybrid direct-producer | Leaf-feeding form       |
| CHE275      | 47.6, 8.52                    | 2013          | CHE                  | <i>Vitis</i> spp. interspecific hybrid direct-producer | Leaf-feeding form       |
| CHE276      | 47.6, 8.52                    | 2013          | CHE                  | <i>Vitis</i> spp. interspecific hybrid direct-producer | Root-feeding form       |
| CHE277      | 47.6, 8.52                    | 2013          | CHE                  | <i>Vitis</i> spp. interspecific hybrid direct-producer | Leaf-feeding form       |
| CHE278      | 47.6, 8.52                    | 2013          | CHE                  | <i>Vitis</i> spp. interspecific hybrid direct-producer | Leaf-feeding form       |
| CHE279      | 47.6, 8.52                    | 2013          | CHE                  | <i>Vitis</i> spp. interspecific hybrid direct-producer | Leaf-feeding form       |
| CHE280      | 47.6, 8.52                    | 2013          | CHE                  | <i>Vitis</i> spp. interspecific hybrid direct-producer | Leaf-feeding form       |
| CHE281      | 47.68, 8.45                   | 2013          | CHE                  | <i>Vitis</i> spp. interspecific rootstock              | Root-feeding form       |
| CHE282      | 47.68, 8.45                   | 2013          | CHE                  | <i>Vitis</i> spp. interspecific rootstock              | Root-feeding form       |
| CHE283      | 47.68, 8.45                   | 2013          | CHE                  | <i>Vitis</i> spp. interspecific rootstock              | Root-feeding form       |
| URY001      | n.a.                          | 2018          | URY                  | <i>Vitis vinifera</i> L. cultivar                      | Leaf-feeding form       |
| URY002      | n.a.                          | 2018          | URY                  | <i>Vitis vinifera</i> L. cultivar                      | Leaf-feeding form       |
| URY003      | n.a.                          | 2018          | URY                  | <i>Vitis vinifera</i> L. cultivar                      | Leaf-feeding form       |
| URY004      | n.a.                          | 2018          | URY                  | <i>Vitis vinifera</i> L. cultivar                      | Leaf-feeding form       |
| URY005      | n.a.                          | 2018          | URY                  | <i>Vitis vinifera</i> L. cultivar                      | Leaf-feeding form       |
| URY006      | n.a.                          | 2018          | URY                  | <i>Vitis vinifera</i> L. cultivar                      | Leaf-feeding form       |
| URY007      | n.a.                          | 2018          | URY                  | <i>Vitis vinifera</i> L. cultivar                      | Leaf-feeding form       |
| URY008      | n.a.                          | 2018          | URY                  | <i>Vitis vinifera</i> L. cultivar                      | Leaf-feeding form       |
| URY009      | n.a.                          | 2018          | URY                  | <i>Vitis vinifera</i> L. cultivar                      | Leaf-feeding form       |
| URY010      | n.a.                          | 2018          | URY                  | <i>Vitis vinifera</i> L. cultivar                      | Leaf-feeding form       |
| URY011      | n.a.                          | 2018          | URY                  | <i>Vitis vinifera</i> L. cultivar                      | Leaf-feeding form       |
| URY012      | n.a.                          | 2018          | URY                  | <i>Vitis vinifera</i> L. cultivar                      | Leaf-feeding form       |
| URY013      | n.a.                          | 2018          | URY                  | <i>Vitis vinifera</i> L. cultivar                      | Leaf-feeding form       |
| URY014      | n.a.                          | 2018          | URY                  | <i>Vitis vinifera</i> L. cultivar                      | Leaf-feeding form       |
| URY015      | n.a.                          | 2018          | URY                  | <i>Vitis vinifera</i> L. cultivar                      | Leaf-feeding form       |
| URY016      | n.a.                          | 2018          | URY                  | <i>Vitis vinifera</i> L. cultivar                      | Leaf-feeding form       |
| URY017      | n.a.                          | 2018          | URY                  | <i>Vitis vinifera</i> L. cultivar                      | Leaf-feeding form       |

| <b>Sample code</b> | <b>Sampling location (lat, long)</b> | <b>Sampling year</b> | <b>Country<sup>1</sup></b> | <b>Host plant</b>                 | <b>Phylloxera feeding form</b> |
|--------------------|--------------------------------------|----------------------|----------------------------|-----------------------------------|--------------------------------|
| URY018             | n.a.                                 | 2018                 | URY                        | <i>Vitis vinifera</i> L. cultivar | Leaf-feeding form              |
| URY019             | n.a.                                 | 2018                 | URY                        | <i>Vitis vinifera</i> L. cultivar | Leaf-feeding form              |
| URY020             | n.a.                                 | 2018                 | URY                        | <i>Vitis vinifera</i> L. cultivar | Leaf-feeding form              |
| URY021             | n.a.                                 | 2018                 | URY                        | <i>Vitis vinifera</i> L. cultivar | Leaf-feeding form              |
| URY022             | n.a.                                 | 2018                 | URY                        | <i>Vitis vinifera</i> L. cultivar | Leaf-feeding form              |
| URY023             | n.a.                                 | 2018                 | URY                        | <i>Vitis vinifera</i> L. cultivar | Leaf-feeding form              |
| URY024             | n.a.                                 | 2018                 | URY                        | <i>Vitis vinifera</i> L. cultivar | Leaf-feeding form              |
| URY025             | n.a.                                 | 2018                 | URY                        | <i>Vitis vinifera</i> L. cultivar | Leaf-feeding form              |
| URY026             | n.a.                                 | 2018                 | URY                        | <i>Vitis vinifera</i> L. cultivar | Leaf-feeding form              |
| URY027             | n.a.                                 | 2018                 | URY                        | <i>Vitis vinifera</i> L. cultivar | Leaf-feeding form              |
| URY028             | n.a.                                 | 2018                 | URY                        | <i>Vitis vinifera</i> L. cultivar | Leaf-feeding form              |
| URY029             | n.a.                                 | 2018                 | URY                        | <i>Vitis vinifera</i> L. cultivar | Leaf-feeding form              |
| URY030             | n.a.                                 | 2018                 | URY                        | <i>Vitis vinifera</i> L. cultivar | Leaf-feeding form              |
| URY031             | n.a.                                 | 2018                 | URY                        | <i>Vitis vinifera</i> L. cultivar | Leaf-feeding form              |
| URY032             | n.a.                                 | 2018                 | URY                        | <i>Vitis vinifera</i> L. cultivar | Leaf-feeding form              |
| URY033             | n.a.                                 | 2018                 | URY                        | <i>Vitis vinifera</i> L. cultivar | Leaf-feeding form              |
| URY034             | n.a.                                 | 2018                 | URY                        | <i>Vitis vinifera</i> L. cultivar | Leaf-feeding form              |
| URY035             | n.a.                                 | 2018                 | URY                        | <i>Vitis vinifera</i> L. cultivar | Leaf-feeding form              |
| URY036             | n.a.                                 | 2018                 | URY                        | <i>Vitis vinifera</i> L. cultivar | Leaf-feeding form              |
| URY037             | n.a.                                 | 2018                 | URY                        | <i>Vitis vinifera</i> L. cultivar | Leaf-feeding form              |
| URY038             | n.a.                                 | 2018                 | URY                        | <i>Vitis vinifera</i> L. cultivar | Leaf-feeding form              |
| URY039             | n.a.                                 | 2018                 | URY                        | <i>Vitis vinifera</i> L. cultivar | Leaf-feeding form              |
| URY040             | n.a.                                 | 2018                 | URY                        | <i>Vitis vinifera</i> L. cultivar | Leaf-feeding form              |
| URY041             | n.a.                                 | 2018                 | URY                        | <i>Vitis vinifera</i> L. cultivar | Leaf-feeding form              |
| URY042             | n.a.                                 | 2018                 | URY                        | <i>Vitis vinifera</i> L. cultivar | Leaf-feeding form              |
| URY043             | n.a.                                 | 2018                 | URY                        | <i>Vitis vinifera</i> L. cultivar | Leaf-feeding form              |
| URY044             | n.a.                                 | 2018                 | URY                        | <i>Vitis vinifera</i> L. cultivar | Leaf-feeding form              |

| Sample code | Sampling location (lat, long) | Sampling year | Country <sup>1</sup> | Host plant                                              | Phylloxera feeding form |
|-------------|-------------------------------|---------------|----------------------|---------------------------------------------------------|-------------------------|
| SRB001      | 45.21, 19.75                  | 2017          | SRB                  | <i>Vitis</i> spp. interspecific resistant grape variety | Leaf-feeding form       |
| SRB002      | 45.21, 19.75                  | 2017          | SRB                  | <i>Vitis</i> spp. interspecific resistant grape variety | Leaf-feeding form       |
| SRB003      | 45.21, 19.75                  | 2017          | SRB                  | <i>Vitis</i> spp. interspecific resistant grape variety | Leaf-feeding form       |
| SRB004      | 45.21, 19.75                  | 2018          | SRB                  | <i>Vitis</i> spp. interspecific resistant grape variety | Root-feeding form       |
| SRB005      | 45.21, 19.75                  | 2018          | SRB                  | <i>Vitis</i> spp. interspecific resistant grape variety | Leaf-feeding form       |
| SRB006      | 45.21, 19.75                  | 2018          | SRB                  | <i>Vitis</i> spp. interspecific resistant grape variety | Leaf-feeding form       |
| SRB007      | 45.21, 19.75                  | 2018          | SRB                  | <i>Vitis</i> spp. interspecific resistant grape variety | Leaf-feeding form       |
| SRB008      | 45.21, 19.75                  | 2018          | SRB                  | <i>Vitis</i> spp. interspecific resistant grape variety | Leaf-feeding form       |
| SRB009      | 45.21, 19.75                  | 2018          | SRB                  | <i>Vitis</i> spp. interspecific resistant grape variety | Leaf-feeding form       |
| SRB010      | 45.21, 19.75                  | 2018          | SRB                  | <i>Vitis</i> spp. interspecific resistant grape variety | Leaf-feeding form       |
| SRB011      | 45.21, 19.75                  | 2018          | SRB                  | <i>Vitis</i> spp. interspecific resistant grape variety | Leaf-feeding form       |
| SRB012      | 45.21, 19.75                  | 2017          | SRB                  | <i>Vitis</i> spp. interspecific rootstock               | Root-feeding form       |
| SRB013      | 45.21, 19.75                  | 2017          | SRB                  | <i>Vitis</i> spp. interspecific rootstock               | Root-feeding form       |
| SRB014      | 45.21, 19.75                  | 2017          | SRB                  | <i>Vitis</i> spp. interspecific rootstock               | Leaf-feeding form       |
| SRB015      | 45.21, 19.75                  | 2017          | SRB                  | <i>Vitis</i> spp. interspecific rootstock               | Leaf-feeding form       |
| SRB016      | 45.21, 19.75                  | 2017          | SRB                  | <i>Vitis</i> spp. interspecific rootstock               | Root-feeding form       |
| SRB017      | 45.21, 19.75                  | 2017          | SRB                  | <i>Vitis</i> spp. interspecific rootstock               | Root-feeding form       |
| SRB018      | 45.21, 19.75                  | 2017          | SRB                  | <i>Vitis</i> spp. interspecific rootstock               | Leaf-feeding form       |
| SRB019      | 45.21, 19.75                  | 2017          | SRB                  | <i>Vitis</i> spp. interspecific rootstock               | Leaf-feeding form       |
| SRB020      | 45.21, 19.75                  | 2017          | SRB                  | <i>Vitis</i> spp. interspecific rootstock               | Leaf-feeding form       |
| SRB021      | 45.21, 19.75                  | 2017          | SRB                  | <i>Vitis</i> spp. interspecific rootstock               | Leaf-feeding form       |
| SRB022      | 45.21, 19.75                  | 2017          | SRB                  | <i>Vitis</i> spp. interspecific rootstock               | Leaf-feeding form       |
| SRB023      | 45.21, 19.75                  | 2018          | SRB                  | <i>Vitis</i> spp. interspecific rootstock               | Leaf-feeding form       |
| SRB024      | 45.21, 19.75                  | 2018          | SRB                  | <i>Vitis</i> spp. interspecific rootstock               | Leaf-feeding form       |
| SRB025      | 45.21, 19.75                  | 2018          | SRB                  | <i>Vitis</i> spp. interspecific rootstock               | Leaf-feeding form       |
| SRB026      | 45.21, 19.75                  | 2018          | SRB                  | <i>Vitis</i> spp. interspecific rootstock               | Leaf-feeding form       |
| SRB027      | 45.21, 19.75                  | 2018          | SRB                  | <i>Vitis</i> spp. interspecific rootstock               | Leaf-feeding form       |

| Sample code | Sampling location (lat, long) | Sampling year | Country <sup>1</sup> | Host plant                                              | Phylloxera feeding form |
|-------------|-------------------------------|---------------|----------------------|---------------------------------------------------------|-------------------------|
| SRB028      | 45.21, 19.75                  | 2018          | SRB                  | <i>Vitis</i> spp. interspecific rootstock               | Leaf-feeding form       |
| SRB029      | 45.21, 19.75                  | 2018          | SRB                  | <i>Vitis</i> spp. interspecific rootstock               | Leaf-feeding form       |
| SRB030      | 45.21, 19.75                  | 2018          | SRB                  | <i>Vitis</i> spp. interspecific rootstock               | Leaf-feeding form       |
| SRB031      | 45.21, 19.75                  | 2018          | SRB                  | <i>Vitis vinifera</i> L. cultivar                       | Leaf-feeding form       |
| SRB032      | 45.21, 19.75                  | 2018          | SRB                  | <i>Vitis vinifera</i> L. cultivar                       | Leaf-feeding form       |
| SRB033      | 45.21, 19.75                  | 2018          | SRB                  | <i>Vitis vinifera</i> L. cultivar                       | Leaf-feeding form       |
| SRB034      | 45.21, 19.75                  | 2018          | SRB                  | <i>Vitis vinifera</i> L. cultivar                       | Leaf-feeding form       |
| SRB035      | 45.21, 19.75                  | 2018          | SRB                  | <i>Vitis vinifera</i> L. cultivar                       | Leaf-feeding form       |
| SRB036      | 45.21, 19.75                  | 2018          | SRB                  | <i>Vitis</i> spp. interspecific resistant grape variety | Leaf-feeding form       |
| SRB037      | 45.21, 19.75                  | 2018          | SRB                  | <i>Vitis</i> spp. interspecific resistant grape variety | Leaf-feeding form       |
| SRB038      | 45.21, 19.75                  | 2018          | SRB                  | <i>Vitis</i> spp. interspecific resistant grape variety | Root-feeding form       |
| SRB039      | 45.21, 19.75                  | 2018          | SRB                  | <i>Vitis vinifera</i> L. cultivar                       | Root-feeding form       |
| ITA001      | 43.2, 12.07                   | 2018          | ITA                  | <i>Vitis</i> spp. interspecific rootstock               | Leaf-feeding form       |
| ITA002      | 43.2, 12.07                   | 2018          | ITA                  | <i>Vitis</i> spp. interspecific rootstock               | Leaf-feeding form       |
| ITA003      | 43.2, 12.07                   | 2018          | ITA                  | <i>Vitis</i> spp. interspecific rootstock               | Leaf-feeding form       |
| ITA004      | 43.2, 12.07                   | 2018          | ITA                  | <i>Vitis</i> spp. interspecific rootstock               | Leaf-feeding form       |
| ITA005      | 43.2, 12.07                   | 2018          | ITA                  | <i>Vitis</i> spp. interspecific rootstock               | Leaf-feeding form       |
| ITA006      | 43.2, 12.07                   | 2018          | ITA                  | <i>Vitis</i> spp. interspecific rootstock               | Leaf-feeding form       |
| ITA007      | 43.72, 11.2                   | 2018          | ITA                  | <i>Vitis</i> spp. interspecific rootstock               | Leaf-feeding form       |
| ITA008      | 43.72, 11.2                   | 2018          | ITA                  | <i>Vitis</i> spp. interspecific rootstock               | Leaf-feeding form       |
| ITA009      | 43.72, 11.2                   | 2018          | ITA                  | <i>Vitis</i> spp. interspecific rootstock               | Leaf-feeding form       |
| ITA010      | 43.72, 11.2                   | 2018          | ITA                  | <i>Vitis</i> spp. interspecific rootstock               | Leaf-feeding form       |
| ITA011      | 43.72, 11.2                   | 2018          | ITA                  | <i>Vitis</i> spp. interspecific rootstock               | Leaf-feeding form       |
| ITA012      | 43.01, 11.53                  | 2018          | ITA                  | <i>Vitis vinifera</i> L. cultivar                       | Leaf-feeding form       |
| ITA013      | 43.01, 11.53                  | 2018          | ITA                  | <i>Vitis vinifera</i> L. cultivar                       | Leaf-feeding form       |
| ITA014      | 43.01, 11.53                  | 2018          | ITA                  | <i>Vitis</i> spp. interspecific rootstock               | Leaf-feeding form       |
| ITA015      | 43.01, 11.53                  | 2018          | ITA                  | <i>Vitis</i> spp. interspecific rootstock               | Leaf-feeding form       |

| Sample code | Sampling location (lat, long) | Sampling year | Country <sup>1</sup> | Host plant                                | Phylloxera feeding form |
|-------------|-------------------------------|---------------|----------------------|-------------------------------------------|-------------------------|
| ITA016      | 43.01, 11.53                  | 2018          | ITA                  | <i>Vitis</i> spp. interspecific rootstock | Leaf-feeding form       |
| ITA017      | 43.07, 11.5                   | 2018          | ITA                  | <i>Vitis vinifera</i> L. cultivar         | Leaf-feeding form       |
| ITA018      | 43.07, 11.5                   | 2018          | ITA                  | <i>Vitis vinifera</i> L. cultivar         | Leaf-feeding form       |
| ITA019      | 43.07, 11.5                   | 2018          | ITA                  | <i>Vitis vinifera</i> L. cultivar         | Leaf-feeding form       |
| ITA020      | 43.07, 11.5                   | 2018          | ITA                  | <i>Vitis vinifera</i> L. cultivar         | Leaf-feeding form       |
| ITA021      | 43.07, 11.5                   | 2018          | ITA                  | <i>Vitis vinifera</i> L. cultivar         | Leaf-feeding form       |
| ITA022      | 43.72, 11.2                   | 2018          | ITA                  | <i>Vitis</i> spp. interspecific rootstock | Leaf-feeding form       |
| ITA023      | 43.72, 11.2                   | 2018          | ITA                  | <i>Vitis</i> spp. interspecific rootstock | Leaf-feeding form       |
| ITA024      | 43.72, 11.2                   | 2018          | ITA                  | <i>Vitis</i> spp. interspecific rootstock | Leaf-feeding form       |
| ITA025      | 43.72, 11.2                   | 2018          | ITA                  | <i>Vitis</i> spp. interspecific rootstock | Leaf-feeding form       |
| ITA026      | 43.72, 11.2                   | 2018          | ITA                  | <i>Vitis</i> spp. interspecific rootstock | Leaf-feeding form       |
| ITA027      | 43.01, 11.53                  | 2018          | ITA                  | <i>Vitis</i> spp. interspecific rootstock | Leaf-feeding form       |
| ITA028      | 43.01, 11.53                  | 2018          | ITA                  | <i>Vitis</i> spp. interspecific rootstock | Leaf-feeding form       |
| ITA029      | 43.01, 11.53                  | 2018          | ITA                  | <i>Vitis</i> spp. interspecific rootstock | Leaf-feeding form       |
| ITA030      | 43.01, 11.53                  | 2018          | ITA                  | <i>Vitis</i> spp. interspecific rootstock | Leaf-feeding form       |
| ITA031      | 43.01, 11.53                  | 2018          | ITA                  | <i>Vitis</i> spp. interspecific rootstock | Leaf-feeding form       |
| ITA032      | 43.72, 11.2                   | 2018          | ITA                  | <i>Vitis</i> spp. interspecific rootstock | Leaf-feeding form       |
| ITA033      | 43.72, 11.2                   | 2018          | ITA                  | <i>Vitis</i> spp. interspecific rootstock | Leaf-feeding form       |
| ITA034      | 43.72, 11.2                   | 2018          | ITA                  | <i>Vitis</i> spp. interspecific rootstock | Leaf-feeding form       |
| ITA035      | 43.72, 11.2                   | 2018          | ITA                  | <i>Vitis</i> spp. interspecific rootstock | Leaf-feeding form       |
| ITA036      | 43.72, 11.2                   | 2018          | ITA                  | <i>Vitis</i> spp. interspecific rootstock | Leaf-feeding form       |
| ITA037      | 43.72, 11.2                   | 2018          | ITA                  | <i>Vitis</i> spp. interspecific rootstock | Leaf-feeding form       |
| ITA038      | 43.72, 11.2                   | 2018          | ITA                  | <i>Vitis</i> spp. interspecific rootstock | Leaf-feeding form       |
| ITA039      | 43.72, 11.2                   | 2018          | ITA                  | <i>Vitis</i> spp. interspecific rootstock | Leaf-feeding form       |
| ITA040      | 43.72, 11.2                   | 2018          | ITA                  | <i>Vitis</i> spp. interspecific rootstock | Leaf-feeding form       |
| ITA041      | 43.72, 11.2                   | 2018          | ITA                  | <i>Vitis</i> spp. interspecific rootstock | Leaf-feeding form       |
| ITA042      | 43.2, 12.07                   | 2018          | ITA                  | <i>Vitis</i> spp. interspecific rootstock | Leaf-feeding form       |

| Sample code | Sampling location (lat, long) | Sampling year | Country <sup>1</sup> | Host plant                                | Phylloxera feeding form |
|-------------|-------------------------------|---------------|----------------------|-------------------------------------------|-------------------------|
| ITA043      | 43.2, 12.07                   | 2018          | ITA                  | <i>Vitis</i> spp. interspecific rootstock | Leaf-feeding form       |
| ITA044      | 43.2, 12.07                   | 2018          | ITA                  | <i>Vitis</i> spp. interspecific rootstock | Leaf-feeding form       |
| ITA045      | 43.2, 12.07                   | 2018          | ITA                  | <i>Vitis</i> spp. interspecific rootstock | Leaf-feeding form       |
| ITA046      | 43.2, 12.07                   | 2018          | ITA                  | <i>Vitis</i> spp. interspecific rootstock | Leaf-feeding form       |
| ITA047      | 43.2, 12.07                   | 2018          | ITA                  | <i>Vitis</i> spp. interspecific rootstock | Leaf-feeding form       |
| ITA048      | 45.89, 11.04                  | 2018          | ITA                  | <i>Vitis</i> spp. interspecific rootstock | Leaf-feeding form       |
| ITA049      | 45.89, 11.04                  | 2018          | ITA                  | <i>Vitis</i> spp. interspecific rootstock | Leaf-feeding form       |
| ITA050      | 45.89, 11.04                  | 2018          | ITA                  | <i>Vitis</i> spp. interspecific rootstock | Leaf-feeding form       |
| ITA051      | 45.89, 11.04                  | 2018          | ITA                  | <i>Vitis</i> spp. interspecific rootstock | Leaf-feeding form       |
| ITA052      | 45.89, 11.04                  | 2018          | ITA                  | <i>Vitis</i> spp. interspecific rootstock | Leaf-feeding form       |
| ITA053      | 45.44, 10.99                  | 2017          | ITA                  | <i>Vitis vinifera</i> L. cultivar         | Leaf-feeding form       |
| ITA054      | 45.44, 10.99                  | 2017          | ITA                  | <i>Vitis vinifera</i> L. cultivar         | Leaf-feeding form       |
| ITA055      | 45.44, 10.99                  | 2017          | ITA                  | <i>Vitis vinifera</i> L. cultivar         | Leaf-feeding form       |
| ITA056      | 45.44, 10.99                  | 2017          | ITA                  | <i>Vitis vinifera</i> L. cultivar         | Leaf-feeding form       |
| ITA057      | 45.44, 10.99                  | 2017          | ITA                  | <i>Vitis vinifera</i> L. cultivar         | Leaf-feeding form       |
| ITA058      | 45.44, 10.99                  | 2017          | ITA                  | <i>Vitis vinifera</i> L. cultivar         | Leaf-feeding form       |
| ITA059      | 45.44, 10.99                  | 2017          | ITA                  | <i>Vitis vinifera</i> L. cultivar         | Leaf-feeding form       |
| ITA060      | 45.44, 10.99                  | 2017          | ITA                  | <i>Vitis vinifera</i> L. cultivar         | Leaf-feeding form       |
| ITA061      | n.a.                          | 2017          | ITA                  | <i>Vitis vinifera</i> L. cultivar         | Leaf-feeding form       |
| ITA062      | n.a.                          | 2017          | ITA                  | <i>Vitis vinifera</i> L. cultivar         | Leaf-feeding form       |
| ITA063      | 45.47, 10.61                  | 2017          | ITA                  | <i>Vitis vinifera</i> L. cultivar         | Leaf-feeding form       |
| ITA064      | 45.47, 10.61                  | 2017          | ITA                  | <i>Vitis vinifera</i> L. cultivar         | Leaf-feeding form       |
| ITA065      | 45.44, 10.99                  | 2017          | ITA                  | <i>Vitis vinifera</i> L. cultivar         | Leaf-feeding form       |
| ITA066      | 45.44, 10.99                  | 2017          | ITA                  | <i>Vitis vinifera</i> L. cultivar         | Leaf-feeding form       |
| ITA067      | 45.44, 10.99                  | 2017          | ITA                  | <i>Vitis vinifera</i> L. cultivar         | Leaf-feeding form       |
| ITA068      | 45.44, 10.99                  | 2017          | ITA                  | <i>Vitis vinifera</i> L. cultivar         | Leaf-feeding form       |
| ITA069      | 45.44, 10.99                  | 2017          | ITA                  | <i>Vitis vinifera</i> L. cultivar         | Leaf-feeding form       |

| Sample code | Sampling location (lat, long) | Sampling year | Country <sup>1</sup> | Host plant                                | Phylloxera feeding form |
|-------------|-------------------------------|---------------|----------------------|-------------------------------------------|-------------------------|
| ITA070      | 45.44, 10.99                  | 2017          | ITA                  | <i>Vitis vinifera</i> L. cultivar         | Leaf-feeding form       |
| ITA071      | 45.42, 11.25                  | 2017          | ITA                  | <i>Vitis vinifera</i> L. cultivar         | Leaf-feeding form       |
| ITA072      | 45.42, 11.25                  | 2017          | ITA                  | <i>Vitis vinifera</i> L. cultivar         | Leaf-feeding form       |
| ITA073      | 45.42, 11.25                  | 2017          | ITA                  | <i>Vitis vinifera</i> L. cultivar         | Leaf-feeding form       |
| ITA074      | 45.42, 11.25                  | 2017          | ITA                  | <i>Vitis vinifera</i> L. cultivar         | Leaf-feeding form       |
| ITA075      | 45.42, 11.25                  | 2017          | ITA                  | <i>Vitis vinifera</i> L. cultivar         | Leaf-feeding form       |
| ITA076      | 45.42, 11.25                  | 2017          | ITA                  | <i>Vitis vinifera</i> L. cultivar         | Leaf-feeding form       |
| ITA077      | 45.42, 11.25                  | 2017          | ITA                  | <i>Vitis vinifera</i> L. cultivar         | Leaf-feeding form       |
| ITA078      | 45.42, 11.25                  | 2017          | ITA                  | <i>Vitis vinifera</i> L. cultivar         | Leaf-feeding form       |
| ITA079      | 45.42, 11.25                  | 2017          | ITA                  | <i>Vitis vinifera</i> L. cultivar         | Leaf-feeding form       |
| ZAF001      | -33.55, 18.96                 | 2019          | ZAF                  | <i>Vitis</i> spp. interspecific rootstock | Leaf-feeding form       |
| ZAF002      | -33.55, 18.96                 | 2019          | ZAF                  | <i>Vitis</i> spp. interspecific rootstock | Leaf-feeding form       |
| ZAF003      | -33.55, 18.96                 | 2019          | ZAF                  | <i>Vitis</i> spp. interspecific rootstock | Leaf-feeding form       |
| ZAF004      | -33.55, 18.96                 | 2019          | ZAF                  | <i>Vitis</i> spp. interspecific rootstock | Leaf-feeding form       |
| ZAF005      | -33.55, 18.96                 | 2019          | ZAF                  | <i>Vitis</i> spp. interspecific rootstock | Leaf-feeding form       |
| ZAF006      | -33.55, 18.96                 | 2019          | ZAF                  | <i>Vitis</i> spp. interspecific rootstock | Leaf-feeding form       |
| ZAF007      | -33.55, 18.96                 | 2019          | ZAF                  | <i>Vitis</i> spp. interspecific rootstock | Leaf-feeding form       |
| ZAF008      | -33.55, 18.96                 | 2019          | ZAF                  | <i>Vitis</i> spp. interspecific rootstock | Leaf-feeding form       |
| HUN001      | 47.69, 19.75                  | 2016          | HUN                  | <i>Vitis</i> spp. interspecific rootstock | Leaf-feeding form       |
| HUN002      | n.a.                          | 2016          | HUN                  | <i>Vitis</i> spp. interspecific rootstock | Leaf-feeding form       |
| HUN003      | n.a.                          | 2016          | HUN                  | <i>Vitis</i> spp. interspecific rootstock | Leaf-feeding form       |
| HUN004      | 47.69, 19.75                  | 2016          | HUN                  | <i>Vitis</i> spp. interspecific rootstock | Leaf-feeding form       |
| HUN005      | 47.69, 19.75                  | 2016          | HUN                  | <i>Vitis</i> spp. interspecific rootstock | Leaf-feeding form       |
| HUN006      | 47.69, 19.75                  | 2016          | HUN                  | <i>Vitis</i> spp. interspecific rootstock | Leaf-feeding form       |
| HUN007      | 47.01, 18.26                  | 2016          | HUN                  | <i>Vitis</i> spp. interspecific rootstock | Root-feeding form       |
| HUN008      | 47.01, 18.26                  | 2016          | HUN                  | <i>Vitis</i> spp. interspecific rootstock | Leaf-feeding form       |
| HUN009      | 47.01, 18.26                  | 2016          | HUN                  | <i>Vitis</i> spp. interspecific rootstock | Leaf-feeding form       |

| Sample code | Sampling location (lat, long) | Sampling year | Country <sup>1</sup> | Host plant                                | Phylloxera feeding form |
|-------------|-------------------------------|---------------|----------------------|-------------------------------------------|-------------------------|
| HUN010      | 47.01, 18.26                  | 2016          | HUN                  | <i>Vitis</i> spp. interspecific rootstock | Leaf-feeding form       |
| HUN011      | 47, 17.99                     | 2016          | HUN                  | <i>Vitis</i> spp. interspecific rootstock | Root-feeding form       |
| HUN012      | 47, 17.99                     | 2016          | HUN                  | <i>Vitis</i> spp. interspecific rootstock | Root-feeding form       |
| HUN013      | 47, 17.99                     | 2016          | HUN                  | <i>Vitis</i> spp. interspecific rootstock | Root-feeding form       |
| HUN014      | 47, 17.99                     | 2016          | HUN                  | <i>Vitis</i> spp. interspecific rootstock | Leaf-feeding form       |
| HUN015      | 47, 17.99                     | 2016          | HUN                  | <i>Vitis</i> spp. interspecific rootstock | Leaf-feeding form       |
| HUN016      | 47, 17.99                     | 2016          | HUN                  | <i>Vitis</i> spp. interspecific rootstock | Leaf-feeding form       |
| HUN017      | 46.89, 17.61                  | 2016          | HUN                  | <i>Vitis</i> spp. interspecific rootstock | Root-feeding form       |
| HUN018      | 46.89, 17.61                  | 2016          | HUN                  | <i>Vitis</i> spp. interspecific rootstock | Root-feeding form       |
| HUN019      | 46.89, 17.61                  | 2016          | HUN                  | <i>Vitis</i> spp. interspecific rootstock | Root-feeding form       |
| HUN020      | 46.89, 17.61                  | 2016          | HUN                  | <i>Vitis</i> spp. interspecific rootstock | Root-feeding form       |
| HUN021      | 46.89, 17.61                  | 2016          | HUN                  | <i>Vitis</i> spp. interspecific rootstock | Leaf-feeding form       |
| HUN022      | 46.89, 17.61                  | 2016          | HUN                  | <i>Vitis</i> spp. interspecific rootstock | Leaf-feeding form       |
| HUN023      | 46.89, 17.61                  | 2016          | HUN                  | <i>Vitis</i> spp. interspecific rootstock | Leaf-feeding form       |
| HUN024      | 46.89, 17.61                  | 2016          | HUN                  | <i>Vitis</i> spp. interspecific rootstock | Leaf-feeding form       |
| HUN025      | 47.68, 16.62                  | 2016          | HUN                  | <i>Vitis</i> spp. interspecific rootstock | Root-feeding form       |
| HUN026      | 47.68, 16.62                  | 2016          | HUN                  | <i>Vitis</i> spp. interspecific rootstock | Root-feeding form       |
| HUN027      | 47.68, 16.62                  | 2016          | HUN                  | <i>Vitis</i> spp. interspecific rootstock | Root-feeding form       |
| HUN028      | 47.68, 16.62                  | 2016          | HUN                  | <i>Vitis</i> spp. interspecific rootstock | Leaf-feeding form       |
| HUN029      | 47.68, 16.62                  | 2016          | HUN                  | <i>Vitis</i> spp. interspecific rootstock | Leaf-feeding form       |
| HUN030      | 47.45, 18.73                  | 2016          | HUN                  | <i>Vitis</i> spp. interspecific rootstock | Leaf-feeding form       |
| HUN031      | 47.45, 18.73                  | 2016          | HUN                  | <i>Vitis</i> spp. interspecific rootstock | Leaf-feeding form       |
| HUN032      | 47.45, 18.73                  | 2016          | HUN                  | <i>Vitis</i> spp. interspecific rootstock | Leaf-feeding form       |
| HUN033      | 47.49, 18.63                  | 2016          | HUN                  | <i>Vitis</i> spp. interspecific rootstock | Root-feeding form       |
| HUN034      | 47.49, 18.63                  | 2016          | HUN                  | <i>Vitis</i> spp. interspecific rootstock | Root-feeding form       |
| HUN035      | 47.49, 18.63                  | 2016          | HUN                  | <i>Vitis</i> spp. interspecific rootstock | Leaf-feeding form       |
| HUN036      | 47.49, 18.63                  | 2016          | HUN                  | <i>Vitis</i> spp. interspecific rootstock | Leaf-feeding form       |



| <b>Sample code</b> | <b>Sampling location (lat, long)</b> | <b>Sampling year</b> | <b>Country<sup>1</sup></b> | <b>Host plant</b>                         | <b>Phylloxera feeding form</b> |
|--------------------|--------------------------------------|----------------------|----------------------------|-------------------------------------------|--------------------------------|
| HUN037             | 47.49, 18.63                         | 2016                 | HUN                        | <i>Vitis</i> spp. interspecific rootstock | Leaf-feeding form              |
| HUN038             | 47.49, 18.63                         | 2016                 | HUN                        | <i>Vitis</i> spp. interspecific rootstock | Leaf-feeding form              |
| HUN039             | 46.09, 18.29                         | 2016                 | HUN                        | <i>Vitis</i> spp. interspecific rootstock | Leaf-feeding form              |
| HUN040             | 46.09, 18.29                         | 2016                 | HUN                        | <i>Vitis</i> spp. interspecific rootstock | Leaf-feeding form              |
| HUN041             | 46.36, 18.69                         | 2016                 | HUN                        | <i>Vitis</i> spp. interspecific rootstock | Root-feeding form              |
| HUN042             | 46.36, 18.69                         | 2016                 | HUN                        | <i>Vitis</i> spp. interspecific rootstock | Root-feeding form              |
| HUN043             | 46.36, 18.69                         | 2016                 | HUN                        | <i>Vitis</i> spp. interspecific rootstock | Root-feeding form              |
| HUN044             | 46.36, 18.69                         | 2016                 | HUN                        | <i>Vitis</i> spp. interspecific rootstock | Root-feeding form              |
| HUN045             | 46.36, 18.69                         | 2016                 | HUN                        | <i>Vitis</i> spp. interspecific rootstock | Root-feeding form              |
| HUN046             | 46.36, 18.69                         | 2016                 | HUN                        | <i>Vitis</i> spp. interspecific rootstock | Leaf-feeding form              |
| HUN047             | 46.36, 18.69                         | 2016                 | HUN                        | <i>Vitis</i> spp. interspecific rootstock | Leaf-feeding form              |
| HUN048             | 46.2, 18.97                          | 2016                 | HUN                        | <i>Vitis</i> spp. interspecific rootstock | Root-feeding form              |
| HUN049             | 46.2, 18.97                          | 2016                 | HUN                        | <i>Vitis</i> spp. interspecific rootstock | Root-feeding form              |
| HUN050             | 46.2, 18.97                          | 2016                 | HUN                        | <i>Vitis</i> spp. interspecific rootstock | Leaf-feeding form              |
| HUN051             | 47.91, 20.35                         | 2016                 | HUN                        | <i>Vitis</i> spp. interspecific rootstock | Leaf-feeding form              |
| HUN052             | 48.12, 21.41                         | 2016                 | HUN                        | <i>Vitis</i> spp. interspecific rootstock | Leaf-feeding form              |
| HUN053             | 48.12, 21.41                         | 2016                 | HUN                        | <i>Vitis</i> spp. interspecific rootstock | Leaf-feeding form              |
| HUN054             | 48.12, 21.41                         | 2016                 | HUN                        | <i>Vitis</i> spp. interspecific rootstock | Leaf-feeding form              |
| HUN055             | 47.55, 21.59                         | 2016                 | HUN                        | <i>Vitis</i> spp. interspecific rootstock | Leaf-feeding form              |
| HUN056             | 47.55, 21.59                         | 2016                 | HUN                        | <i>Vitis</i> spp. interspecific rootstock | Leaf-feeding form              |
| HUN057             | 46.94, 19.65                         | 2016                 | HUN                        | <i>Vitis</i> spp. interspecific rootstock | Leaf-feeding form              |
| HUN058             | 46.94, 19.65                         | 2016                 | HUN                        | <i>Vitis</i> spp. interspecific rootstock | Leaf-feeding form              |
| HUN059             | 47.58, 19.37                         | 2016                 | HUN                        | <i>Vitis</i> spp. interspecific rootstock | Root-feeding form              |
| HUN060             | 47.58, 19.37                         | 2016                 | HUN                        | <i>Vitis</i> spp. interspecific rootstock | Root-feeding form              |
| HUN061             | 47.58, 19.37                         | 2016                 | HUN                        | <i>Vitis</i> spp. interspecific rootstock | Root-feeding form              |
| HUN062             | 47.58, 19.37                         | 2016                 | HUN                        | <i>Vitis</i> spp. interspecific rootstock | Root-feeding form              |
| HUN063             | 47.58, 19.37                         | 2016                 | HUN                        | <i>Vitis</i> spp. interspecific rootstock | Root-feeding form              |

| <b>Sample code</b> | <b>Sampling location (lat, long)</b> | <b>Sampling year</b> | <b>Country<sup>1</sup></b> | <b>Host plant</b>                         | <b>Phylloxera feeding form</b> |
|--------------------|--------------------------------------|----------------------|----------------------------|-------------------------------------------|--------------------------------|
| HUN064             | 47.58, 19.37                         | 2016                 | HUN                        | <i>Vitis</i> spp. interspecific rootstock | Leaf-feeding form              |
| HUN065             | 47.49, 18.91                         | 2016                 | HUN                        | <i>Vitis</i> spp. interspecific rootstock | Root-feeding form              |
| HUN066             | 47.49, 18.91                         | 2016                 | HUN                        | <i>Vitis</i> spp. interspecific rootstock | Root-feeding form              |
| HUN067             | 47.49, 18.91                         | 2016                 | HUN                        | <i>Vitis</i> spp. interspecific rootstock | Root-feeding form              |
| HUN068             | 47.49, 18.91                         | 2016                 | HUN                        | <i>Vitis</i> spp. interspecific rootstock | Root-feeding form              |
| HUN069             | 47.49, 18.91                         | 2016                 | HUN                        | <i>Vitis</i> spp. interspecific rootstock | Root-feeding form              |
| HUN070             | 47.49, 18.91                         | 2016                 | HUN                        | <i>Vitis</i> spp. interspecific rootstock | Leaf-feeding form              |
| HUN071             | 47.49, 18.91                         | 2016                 | HUN                        | <i>Vitis</i> spp. interspecific rootstock | Leaf-feeding form              |
| HUN072             | 47.49, 18.91                         | 2016                 | HUN                        | <i>Vitis</i> spp. interspecific rootstock | Leaf-feeding form              |
| HUN073             | 47.49, 18.91                         | 2016                 | HUN                        | <i>Vitis</i> spp. interspecific rootstock | Leaf-feeding form              |
| HUN074             | 47.56, 17.76                         | 2016                 | HUN                        | <i>Vitis</i> spp. interspecific rootstock | Leaf-feeding form              |
| HUN075             | 47.56, 17.76                         | 2016                 | HUN                        | <i>Vitis</i> spp. interspecific rootstock | Leaf-feeding form              |
| HUN076             | 47.56, 17.76                         | 2016                 | HUN                        | <i>Vitis</i> spp. interspecific rootstock | Leaf-feeding form              |
| HUN077             | 47.56, 17.76                         | 2016                 | HUN                        | <i>Vitis</i> spp. interspecific rootstock | Leaf-feeding form              |
| HUN078             | 47.84, 20.24                         | 2016                 | HUN                        | <i>Vitis</i> spp. interspecific rootstock | Root-feeding form              |
| HUN079             | 47.84, 20.24                         | 2016                 | HUN                        | <i>Vitis</i> spp. interspecific rootstock | Root-feeding form              |
| HUN080             | 47.84, 20.24                         | 2016                 | HUN                        | <i>Vitis</i> spp. interspecific rootstock | Root-feeding form              |
| HUN081             | 47.84, 20.24                         | 2016                 | HUN                        | <i>Vitis</i> spp. interspecific rootstock | Leaf-feeding form              |
| HUN082             | 47.69, 19.75                         | 2016                 | HUN                        | <i>Vitis</i> spp. interspecific rootstock | Root-feeding form              |
| HUN083             | 47.01, 18.26                         | 2016                 | HUN                        | <i>Vitis</i> spp. interspecific rootstock | Root-feeding form              |
| HUN084             | 47.91, 20.35                         | 2016                 | HUN                        | <i>Vitis</i> spp. interspecific rootstock | Root-feeding form              |
| HUN085             | 47.49, 18.63                         | 2016                 | HUN                        | <i>Vitis</i> spp. interspecific rootstock | Root-feeding form              |
| HUN086             | 46.09, 18.29                         | 2016                 | HUN                        | <i>Vitis</i> spp. interspecific rootstock | Root-feeding form              |
| HUN087             | 46.09, 18.29                         | 2016                 | HUN                        | <i>Vitis</i> spp. interspecific rootstock | Root-feeding form              |
| HUN088             | 46.09, 18.29                         | 2016                 | HUN                        | <i>Vitis</i> spp. interspecific rootstock | Root-feeding form              |
| HUN089             | 47.8, 20.35                          | 2016                 | HUN                        | <i>Vitis</i> spp. interspecific rootstock | Root-feeding form              |
| HUN090             | 47.8, 20.35                          | 2016                 | HUN                        | <i>Vitis</i> spp. interspecific rootstock | Root-feeding form              |

| Sample code | Sampling location (lat, long) | Sampling year | Country <sup>1</sup> | Host plant                                | Phylloxera feeding form |
|-------------|-------------------------------|---------------|----------------------|-------------------------------------------|-------------------------|
| HUN091      | 47.8, 20.35                   | 2016          | HUN                  | <i>Vitis</i> spp. interspecific rootstock | Root-feeding form       |
| HUN092      | 47.91, 20.35                  | 2016          | HUN                  | <i>Vitis</i> spp. interspecific rootstock | Root-feeding form       |
| HUN093      | 47.55, 21.59                  | 2016          | HUN                  | <i>Vitis</i> spp. interspecific rootstock | Root-feeding form       |
| HUN094      | 47.55, 21.59                  | 2016          | HUN                  | <i>Vitis</i> spp. interspecific rootstock | Root-feeding form       |
| HUN095      | 47.55, 21.59                  | 2016          | HUN                  | <i>Vitis</i> spp. interspecific rootstock | Root-feeding form       |
| HUN096      | 46.94, 19.65                  | 2016          | HUN                  | <i>Vitis</i> spp. interspecific rootstock | Root-feeding form       |
| HUN097      | 46.94, 19.65                  | 2016          | HUN                  | <i>Vitis</i> spp. interspecific rootstock | Root-feeding form       |
| HUN098      | 46.94, 19.65                  | 2016          | HUN                  | <i>Vitis</i> spp. interspecific rootstock | Root-feeding form       |
| HUN099      | 47.56, 17.76                  | 2016          | HUN                  | <i>Vitis</i> spp. interspecific rootstock | Root-feeding form       |
| HUN100      | 47.56, 17.76                  | 2016          | HUN                  | <i>Vitis</i> spp. interspecific rootstock | Root-feeding form       |
| HUN101      | 47.56, 17.76                  | 2016          | HUN                  | <i>Vitis</i> spp. interspecific rootstock | Root-feeding form       |
| HUN102      | 47.84, 20.24                  | 2016          | HUN                  | <i>Vitis</i> spp. interspecific rootstock | Leaf-feeding form       |
| HRV001      | 45.81, 15.98                  | 2015          | HRV                  | n.a.                                      | n.a.                    |
| HRV002      | 45.81, 15.98                  | 2015          | HRV                  | n.a.                                      | n.a.                    |
| HRV003      | 45.81, 15.98                  | 2015          | HRV                  | n.a.                                      | n.a.                    |
| HRV004      | 45.81, 15.98                  | 2015          | HRV                  | n.a.                                      | n.a.                    |
| HRV005      | 45.81, 15.98                  | 2015          | HRV                  | n.a.                                      | n.a.                    |
| HRV006      | 45.81, 15.98                  | 2015          | HRV                  | n.a.                                      | n.a.                    |
| HRV007      | 45.81, 15.98                  | 2015          | HRV                  | n.a.                                      | n.a.                    |
| HRV008      | 45.81, 15.98                  | 2015          | HRV                  | n.a.                                      | n.a.                    |
| HRV009      | 45.81, 15.98                  | 2015          | HRV                  | n.a.                                      | n.a.                    |
| HRV010      | 45.81, 15.98                  | 2015          | HRV                  | <i>Vitis vinifera</i> L. cultivar         | Leaf-feeding form       |
| HRV011      | 45.81, 15.98                  | 2015          | HRV                  | <i>Vitis vinifera</i> L. cultivar         | Leaf-feeding form       |
| HRV012      | 45.81, 15.98                  | 2015          | HRV                  | <i>Vitis vinifera</i> L. cultivar         | Leaf-feeding form       |
| HRV013      | 45.81, 15.98                  | 2015          | HRV                  | <i>Vitis vinifera</i> L. cultivar         | Leaf-feeding form       |
| HRV014      | 45.73, 15.72                  | 2015          | HRV                  | <i>Vitis</i> spp. interspecific rootstock | Leaf-feeding form       |
| HRV015      | 45.73, 15.72                  | 2015          | HRV                  | <i>Vitis</i> spp. interspecific rootstock | Leaf-feeding form       |

| Sample code | Sampling location (lat, long) | Sampling year | Country <sup>1</sup> | Host plant                                | Phylloxera feeding form |
|-------------|-------------------------------|---------------|----------------------|-------------------------------------------|-------------------------|
| HRV016      | 45.73, 15.72                  | 2015          | HRV                  | <i>Vitis</i> spp. interspecific rootstock | Leaf-feeding form       |
| HRV017      | 45.73, 15.72                  | 2015          | HRV                  | <i>Vitis</i> spp. interspecific rootstock | Leaf-feeding form       |
| HRV018      | 45.73, 15.72                  | 2015          | HRV                  | <i>Vitis</i> spp. interspecific rootstock | Leaf-feeding form       |
| HRV019      | 45.73, 15.72                  | 2015          | HRV                  | <i>Vitis</i> spp. interspecific rootstock | Leaf-feeding form       |
| HRV020      | 45.73, 15.72                  | 2015          | HRV                  | <i>Vitis</i> spp. interspecific rootstock | Leaf-feeding form       |
| HRV021      | 45.72, 15.72                  | 2015          | HRV                  | <i>Vitis</i> spp. interspecific rootstock | Leaf-feeding form       |
| HRV022      | 45.72, 15.72                  | 2015          | HRV                  | <i>Vitis</i> spp. interspecific rootstock | Leaf-feeding form       |
| HRV023      | 45.72, 15.72                  | 2015          | HRV                  | <i>Vitis</i> spp. interspecific rootstock | Leaf-feeding form       |
| HRV024      | 45.72, 15.7                   | 2015          | HRV                  | <i>Vitis</i> spp. interspecific rootstock | Leaf-feeding form       |
| HRV025      | 45.72, 15.7                   | 2015          | HRV                  | <i>Vitis</i> spp. interspecific rootstock | Leaf-feeding form       |
| HRV026      | 45.72, 15.7                   | 2015          | HRV                  | <i>Vitis</i> spp. interspecific rootstock | Leaf-feeding form       |
| HRV027      | 45.72, 15.7                   | 2015          | HRV                  | <i>Vitis</i> spp. interspecific rootstock | Leaf-feeding form       |
| HRV028      | 45.72, 15.7                   | 2015          | HRV                  | <i>Vitis</i> spp. interspecific rootstock | Leaf-feeding form       |
| HRV029      | 45.72, 15.7                   | 2015          | HRV                  | <i>Vitis</i> spp. interspecific rootstock | Leaf-feeding form       |
| HRV030      | 45.72, 15.7                   | 2015          | HRV                  | <i>Vitis</i> spp. interspecific rootstock | Leaf-feeding form       |
| HRV031      | 45.72, 15.7                   | 2015          | HRV                  | <i>Vitis</i> spp. interspecific rootstock | Leaf-feeding form       |
| HRV032      | 45.72, 15.7                   | 2015          | HRV                  | <i>Vitis</i> spp. interspecific rootstock | Leaf-feeding form       |
| HRV033      | 45.72, 15.7                   | 2015          | HRV                  | <i>Vitis</i> spp. interspecific rootstock | Leaf-feeding form       |
| HRV034      | 45.72, 15.7                   | 2015          | HRV                  | <i>Vitis</i> spp. interspecific rootstock | Leaf-feeding form       |
| HRV035      | 45.72, 15.7                   | 2015          | HRV                  | <i>Vitis</i> spp. interspecific rootstock | Leaf-feeding form       |
| HRV036      | 45.72, 15.7                   | 2015          | HRV                  | <i>Vitis</i> spp. interspecific rootstock | Leaf-feeding form       |
| HRV037      | 45.71, 15.72                  | 2015          | HRV                  | <i>Vitis</i> spp. interspecific rootstock | Leaf-feeding form       |
| HRV038      | 45.71, 15.72                  | 2015          | HRV                  | <i>Vitis</i> spp. interspecific rootstock | Leaf-feeding form       |
| HRV039      | 45.71, 15.72                  | 2015          | HRV                  | <i>Vitis</i> spp. interspecific rootstock | Leaf-feeding form       |
| HRV040      | 45.71, 15.72                  | 2015          | HRV                  | <i>Vitis</i> spp. interspecific rootstock | Leaf-feeding form       |
| HRV041      | 45.71, 15.72                  | 2015          | HRV                  | <i>Vitis</i> spp. interspecific rootstock | Leaf-feeding form       |
| HRV042      | 45.71, 15.72                  | 2015          | HRV                  | <i>Vitis</i> spp. interspecific rootstock | Leaf-feeding form       |

| Sample code | Sampling location (lat, long) | Sampling year | Country <sup>1</sup> | Host plant                                | Phylloxera feeding form |
|-------------|-------------------------------|---------------|----------------------|-------------------------------------------|-------------------------|
| HRV043      | 45.71, 15.72                  | 2015          | HRV                  | <i>Vitis</i> spp. interspecific rootstock | Leaf-feeding form       |
| HRV044      | 45.71, 15.72                  | 2015          | HRV                  | <i>Vitis</i> spp. interspecific rootstock | Leaf-feeding form       |
| HRV045      | 45.74, 15.69                  | 2015          | HRV                  | <i>Vitis</i> spp. interspecific rootstock | Leaf-feeding form       |
| HRV046      | 45.74, 15.69                  | 2015          | HRV                  | <i>Vitis</i> spp. interspecific rootstock | Leaf-feeding form       |
| HRV047      | 45.89, 17.19                  | 2015          | HRV                  | <i>Vitis</i> spp. interspecific rootstock | Leaf-feeding form       |
| HRV048      | 45.89, 17.19                  | 2015          | HRV                  | <i>Vitis</i> spp. interspecific rootstock | Leaf-feeding form       |
| HRV049      | 45.89, 17.19                  | 2015          | HRV                  | <i>Vitis</i> spp. interspecific rootstock | Leaf-feeding form       |
| HRV050      | 45.89, 17.19                  | 2015          | HRV                  | <i>Vitis</i> spp. interspecific rootstock | Leaf-feeding form       |
| HRV051      | 45.89, 17.19                  | 2015          | HRV                  | <i>Vitis</i> spp. interspecific rootstock | Leaf-feeding form       |
| HRV052      | 45.22, 13.58                  | 2015          | HRV                  | <i>Vitis vinifera</i> L. cultivar         | Leaf-feeding form       |
| HRV053      | 45.22, 13.65                  | 2015          | HRV                  | <i>Vitis</i> spp. interspecific rootstock | Leaf-feeding form       |
| HRV054      | 45.22, 13.65                  | 2015          | HRV                  | <i>Vitis</i> spp. interspecific rootstock | Leaf-feeding form       |
| HRV055      | 45.21, 13.69                  | 2015          | HRV                  | <i>Vitis</i> spp. interspecific rootstock | Leaf-feeding form       |
| HRV056      | 45.21, 13.69                  | 2015          | HRV                  | <i>Vitis</i> spp. interspecific rootstock | Leaf-feeding form       |
| HRV057      | 45.21, 13.69                  | 2015          | HRV                  | <i>Vitis</i> spp. interspecific rootstock | Leaf-feeding form       |
| HRV058      | 45.21, 13.69                  | 2015          | HRV                  | <i>Vitis</i> spp. interspecific rootstock | Leaf-feeding form       |
| HRV059      | 45.21, 13.69                  | 2015          | HRV                  | <i>Vitis</i> spp. interspecific rootstock | Leaf-feeding form       |
| HRV060      | 45.21, 13.69                  | 2015          | HRV                  | <i>Vitis</i> spp. interspecific rootstock | Leaf-feeding form       |
| HRV061      | 45.21, 13.69                  | 2015          | HRV                  | <i>Vitis</i> spp. interspecific rootstock | Leaf-feeding form       |
| HRV062      | 45.21, 13.69                  | 2015          | HRV                  | <i>Vitis</i> spp. interspecific rootstock | Leaf-feeding form       |
| HRV063      | 45.21, 13.69                  | 2015          | HRV                  | <i>Vitis</i> spp. interspecific rootstock | Leaf-feeding form       |
| HRV064      | 45.21, 13.69                  | 2015          | HRV                  | <i>Vitis</i> spp. interspecific rootstock | Leaf-feeding form       |
| HRV065      | 45.21, 13.69                  | 2015          | HRV                  | <i>Vitis</i> spp. interspecific rootstock | Leaf-feeding form       |
| HRV066      | 45.21, 13.69                  | 2015          | HRV                  | <i>Vitis</i> spp. interspecific rootstock | Leaf-feeding form       |
| HRV067      | 45.21, 13.69                  | 2015          | HRV                  | <i>Vitis</i> spp. interspecific rootstock | Leaf-feeding form       |
| HRV068      | 45.21, 13.69                  | 2015          | HRV                  | <i>Vitis</i> spp. interspecific rootstock | Leaf-feeding form       |
| HRV069      | 45.21, 13.69                  | 2015          | HRV                  | <i>Vitis</i> spp. interspecific rootstock | Leaf-feeding form       |

| Sample code | Sampling location (lat, long) | Sampling year | Country <sup>1</sup> | Host plant                                | Phylloxera feeding form |
|-------------|-------------------------------|---------------|----------------------|-------------------------------------------|-------------------------|
| HRV070      | 45.09, 14.64                  | 2015          | HRV                  | <i>Vitis</i> spp. interspecific rootstock | Leaf-feeding form       |
| HRV071      | 45.07, 14.66                  | 2015          | HRV                  | <i>Vitis</i> spp. interspecific rootstock | Leaf-feeding form       |
| HRV072      | 45.07, 14.66                  | 2015          | HRV                  | <i>Vitis</i> spp. interspecific rootstock | Leaf-feeding form       |
| HRV073      | 45.07, 14.66                  | 2015          | HRV                  | <i>Vitis</i> spp. interspecific rootstock | Leaf-feeding form       |
| HRV074      | 45.07, 14.66                  | 2015          | HRV                  | <i>Vitis</i> spp. interspecific rootstock | Leaf-feeding form       |
| HRV075      | 45.07, 14.66                  | 2015          | HRV                  | <i>Vitis</i> spp. interspecific rootstock | Leaf-feeding form       |
| HRV076      | 45.07, 14.66                  | 2015          | HRV                  | <i>Vitis</i> spp. interspecific rootstock | Leaf-feeding form       |
| HRV077      | 45.07, 14.66                  | 2015          | HRV                  | <i>Vitis</i> spp. interspecific rootstock | Leaf-feeding form       |
| HRV078      | 45.59, 15.92                  | 2015          | HRV                  | <i>Vitis vinifera</i> L. cultivar         | Leaf-feeding form       |
| HRV079      | 45.59, 15.92                  | 2015          | HRV                  | <i>Vitis vinifera</i> L. cultivar         | Leaf-feeding form       |
| HRV080      | 45.59, 15.92                  | 2015          | HRV                  | <i>Vitis vinifera</i> L. cultivar         | Leaf-feeding form       |
| HRV081      | 45.59, 15.92                  | 2015          | HRV                  | <i>Vitis vinifera</i> L. cultivar         | Leaf-feeding form       |
| HRV082      | 45.59, 15.92                  | 2015          | HRV                  | <i>Vitis vinifera</i> L. cultivar         | Leaf-feeding form       |
| HRV083      | 45.59, 15.92                  | 2015          | HRV                  | <i>Vitis vinifera</i> L. cultivar         | Leaf-feeding form       |
| HRV084      | 45.59, 15.92                  | 2015          | HRV                  | <i>Vitis vinifera</i> L. cultivar         | Leaf-feeding form       |
| HRV085      | 45.59, 15.92                  | 2015          | HRV                  | <i>Vitis vinifera</i> L. cultivar         | Leaf-feeding form       |
| HRV086      | 45.59, 15.92                  | 2015          | HRV                  | <i>Vitis vinifera</i> L. cultivar         | Leaf-feeding form       |
| HRV087      | 45.59, 15.92                  | 2015          | HRV                  | <i>Vitis vinifera</i> L. cultivar         | Leaf-feeding form       |
| HRV088      | 45.59, 15.92                  | 2015          | HRV                  | <i>Vitis vinifera</i> L. cultivar         | Leaf-feeding form       |
| HRV089      | 45.82, 15.59                  | 2015          | HRV                  | <i>Vitis vinifera</i> L. cultivar         | Leaf-feeding form       |
| HRV090      | 45.82, 15.59                  | 2015          | HRV                  | <i>Vitis vinifera</i> L. cultivar         | Leaf-feeding form       |
| HRV091      | 45.82, 15.59                  | 2015          | HRV                  | <i>Vitis vinifera</i> L. cultivar         | Leaf-feeding form       |
| HRV092      | 45.82, 15.59                  | 2015          | HRV                  | <i>Vitis vinifera</i> L. cultivar         | Leaf-feeding form       |
| HRV093      | 45.82, 15.59                  | 2015          | HRV                  | <i>Vitis vinifera</i> L. cultivar         | Leaf-feeding form       |
| HRV094      | 45.82, 15.59                  | 2015          | HRV                  | <i>Vitis vinifera</i> L. cultivar         | Leaf-feeding form       |
| HRV095      | 45.82, 15.59                  | 2015          | HRV                  | <i>Vitis vinifera</i> L. cultivar         | Leaf-feeding form       |
| HRV096      | 43.08, 17.62                  | 2015          | HRV                  | <i>Vitis vinifera</i> L. cultivar         | Leaf-feeding form       |

| Sample code | Sampling location (lat, long) | Sampling year | Country <sup>1</sup> | Host plant                                | Phylloxera feeding form |
|-------------|-------------------------------|---------------|----------------------|-------------------------------------------|-------------------------|
| HRV097      | 43.08, 17.62                  | 2015          | HRV                  | <i>Vitis vinifera</i> L. cultivar         | Leaf-feeding form       |
| HRV098      | 43.03, 17.59                  | 2015          | HRV                  | <i>Vitis vinifera</i> L. cultivar         | Leaf-feeding form       |
| HRV099      | 43.03, 17.59                  | 2015          | HRV                  | <i>Vitis vinifera</i> L. cultivar         | Leaf-feeding form       |
| HRV100      | 43.03, 17.59                  | 2015          | HRV                  | <i>Vitis vinifera</i> L. cultivar         | Leaf-feeding form       |
| HRV101      | 43.03, 17.59                  | 2015          | HRV                  | <i>Vitis vinifera</i> L. cultivar         | Leaf-feeding form       |
| HRV102      | 43.03, 17.59                  | 2015          | HRV                  | <i>Vitis vinifera</i> L. cultivar         | Leaf-feeding form       |
| HRV103      | 43.03, 17.59                  | 2015          | HRV                  | <i>Vitis vinifera</i> L. cultivar         | Leaf-feeding form       |
| HRV104      | 43.03, 17.59                  | 2015          | HRV                  | <i>Vitis vinifera</i> L. cultivar         | Leaf-feeding form       |
| HRV105      | 43.02, 17.57                  | 2015          | HRV                  | <i>Vitis vinifera</i> L. cultivar         | Leaf-feeding form       |
| HRV106      | 43.02, 17.57                  | 2015          | HRV                  | <i>Vitis vinifera</i> L. cultivar         | Leaf-feeding form       |
| HRV107      | 43.02, 17.57                  | 2015          | HRV                  | <i>Vitis vinifera</i> L. cultivar         | Leaf-feeding form       |
| ROU001      | 47.16, 27.59                  | 2016          | ROU                  | <i>Vitis</i> spp. interspecific rootstock | Leaf-feeding form       |
| ROU002      | 47.16, 27.59                  | 2016          | ROU                  | <i>Vitis</i> spp. interspecific rootstock | Leaf-feeding form       |
| ROU003      | 47.16, 27.59                  | 2016          | ROU                  | <i>Vitis</i> spp. interspecific rootstock | Leaf-feeding form       |

<sup>1</sup>: AUT: Austria; CHE: Switzerland; DEU: Germany; HUN: Hungary; HRV: Croatia; ITA: Italy; ROU: Romania; SRB: Serbia; URY: Uruguay; ZAF: South Africa
